# Supplementary material for: Genome-Wide Identification of R2R3-MYB Transcription Factor and Expression Analysis under Abiotic Stress in Rice
Source: MDPI journal article supplement (doi:10.3390/plants11151928), 2022-07-25
Supplement: s1 [file s1]

**Table S6.** Statistical Analysis of Os2R\_MYB Genes Expression Level under the PEG and CdCl<sub>2</sub> Stresses

| Stresses                  | Gene Name         | Gene ID                 | Expression patterns         |
|---------------------------|-------------------|-------------------------|-----------------------------|
| PEG                       | <i>Os2R_MYB36</i> | <i>LOC_Os03g20090.1</i> | up-regulated                |
|                           | <i>Os2R_MYB1</i>  | <i>LOC_Os01g03720.1</i> |                             |
|                           | <i>Os2R_MYB18</i> | <i>LOC_Os01g65370.1</i> |                             |
|                           | <i>Os2R_MYB81</i> | <i>LOC_Os08g43550.1</i> |                             |
|                           | <i>Os2R_MYB98</i> | <i>LOC_Os12g37970.1</i> |                             |
|                           | <i>Os2R_MYB3</i>  | <i>LOC_Os01g07450.1</i> | down-regulated              |
|                           | <i>Os2R_MYB7</i>  | <i>LOC_Os01g19970.1</i> |                             |
|                           | <i>Os2R_MYB15</i> | <i>LOC_Os01g59660.1</i> |                             |
|                           | <i>Os2R_MYB16</i> | <i>LOC_Os01g63160.1</i> |                             |
|                           | <i>Os2R_MYB21</i> | <i>LOC_Os02g02370.1</i> |                             |
|                           | <i>Os2R_MYB23</i> | <i>LOC_Os02g17190.1</i> |                             |
|                           | <i>Os2R_MYB47</i> | <i>LOC_Os04g45020.1</i> |                             |
|                           | <i>Os2R_MYB51</i> | <i>LOC_Os04g50770.1</i> |                             |
|                           | <i>Os2R_MYB56</i> | <i>LOC_Os05g37060.1</i> |                             |
|                           | <i>Os2R_MYB76</i> | <i>LOC_Os08g33150.1</i> |                             |
|                           | <i>Os2R_MYB89</i> | <i>LOC_Os11g10130.1</i> |                             |
|                           | <i>Os2R_MYB93</i> | <i>LOC_Os12g03150.1</i> |                             |
|                           | <i>Os2R_MYB2</i>  | <i>LOC_Os01g04930.1</i> |                             |
|                           | <i>Os2R_MYB90</i> | <i>LOC_Os11g35390.1</i> |                             |
|                           | <i>Os2R_MYB99</i> | <i>LOC_Os12g41920.2</i> |                             |
| CdCl <sub>2</sub>         | <i>Os2R_MYB36</i> | <i>LOC_Os03g20090.1</i> | up-regulated                |
|                           | <i>Os2R_MYB1</i>  | <i>LOC_Os01g03720.1</i> | down-regulated              |
|                           | <i>Os2R_MYB18</i> | <i>LOC_Os01g65370.1</i> |                             |
|                           | <i>Os2R_MYB81</i> | <i>LOC_Os08g43550.1</i> |                             |
|                           | <i>Os2R_MYB98</i> | <i>LOC_Os12g37970.1</i> |                             |
|                           | <i>Os2R_MYB3</i>  | <i>LOC_Os01g07450.1</i> |                             |
|                           | <i>Os2R_MYB7</i>  | <i>LOC_Os01g19970.1</i> |                             |
|                           | <i>Os2R_MYB15</i> | <i>LOC_Os01g59660.1</i> |                             |
|                           | <i>Os2R_MYB16</i> | <i>LOC_Os01g63160.1</i> |                             |
|                           | <i>Os2R_MYB21</i> | <i>LOC_Os02g02370.1</i> |                             |
|                           | <i>Os2R_MYB23</i> | <i>LOC_Os02g17190.1</i> |                             |
|                           | <i>Os2R_MYB47</i> | <i>LOC_Os04g45020.1</i> |                             |
|                           | <i>Os2R_MYB51</i> | <i>LOC_Os04g50770.1</i> |                             |
|                           | <i>Os2R_MYB56</i> | <i>LOC_Os05g37060.1</i> |                             |
|                           | <i>Os2R_MYB76</i> | <i>LOC_Os08g33150.1</i> |                             |
|                           | <i>Os2R_MYB89</i> | <i>LOC_Os11g10130.1</i> |                             |
|                           | <i>Os2R_MYB93</i> | <i>LOC_Os12g03150.1</i> |                             |
|                           | <i>Os2R_MYB2</i>  | <i>LOC_Os01g04930.1</i> | had no obvious changes      |
|                           | <i>Os2R_MYB90</i> | <i>LOC_Os11g35390.1</i> |                             |
|                           | <i>Os2R_MYB99</i> | <i>LOC_Os12g41920.2</i> |                             |
| PEG and CdCl <sub>2</sub> | <i>Os2R_MYB36</i> | <i>LOC_Os03g20090.1</i> | up-regulated                |
|                           | <i>Os2R_MYB1</i>  | <i>LOC_Os01g03720.1</i> | expression pattern opposite |
|                           | <i>Os2R_MYB18</i> | <i>LOC_Os01g65370.1</i> |                             |
|                           | <i>Os2R_MYB81</i> | <i>LOC_Os08g43550.1</i> |                             |
|                           | <i>Os2R_MYB98</i> | <i>LOC_Os12g37970.1</i> |                             |
