# Supplementary material for: Genome-Wide Identification of R2R3-MYB Transcription Factor and Expression Analysis under Abiotic Stress in Rice
Source: MDPI journal article supplement (doi:10.3390/plants11151928), 2022-07-25
Supplement: s1 [file s1]

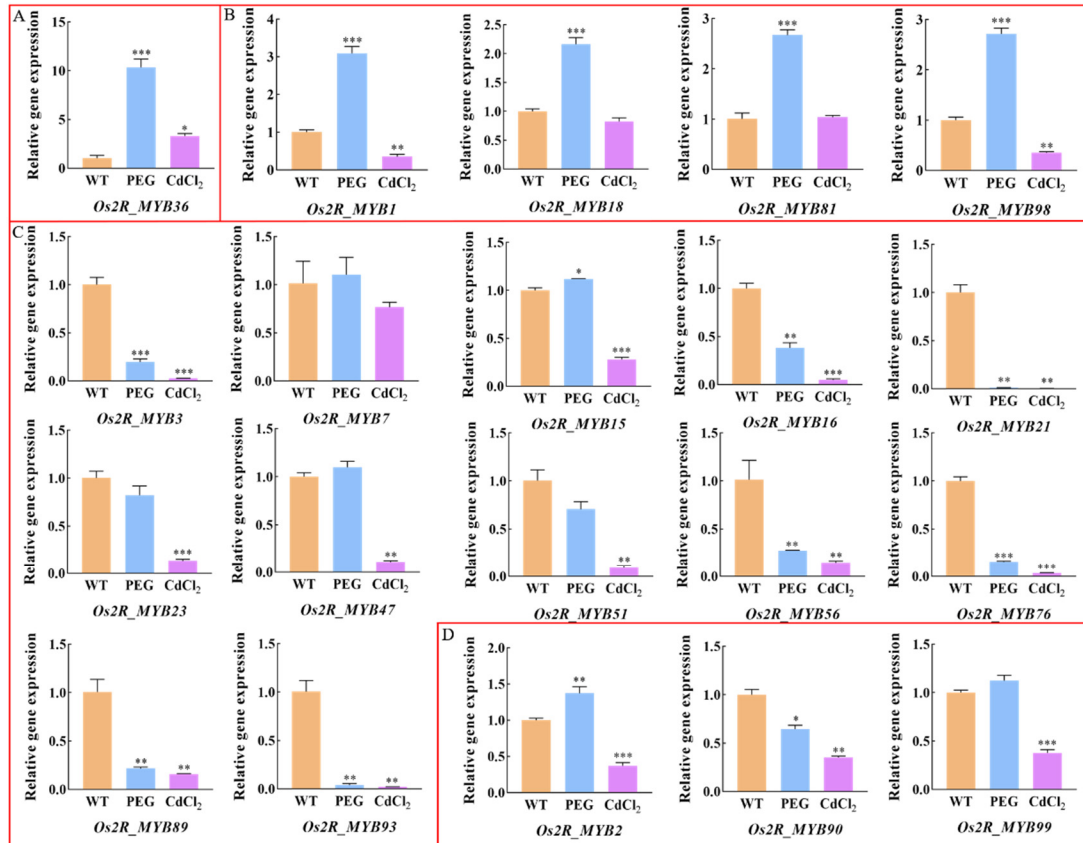

**Figure S2.** Relative gene expression of 20 *Os2R\_MYBs* under PEG and CdCl<sub>2</sub> stress treatments. A, B, C and D represent different expression patterns under PEG and CdCl<sub>2</sub> stress treatment. Nipponbare cultivar was used as the control, *OsGAPDH* was used as a reference gene. The relative expression levels of each gene were calculated by the  $2^{-\Delta\Delta C_t}$  method. All reactions were set-up in triplicates. Bars represent the standard deviation (SD) of the three replicates. A significant difference is indicated by an asterisk according to t-test (\*  $p < 0.05$ , \*\*  $p < 0.01$ , and \*\*\*  $p < 0.001$ ).
