# Supplementary material for: Genome-Wide Identification of R2R3-MYB Transcription Factor and Expression Analysis under Abiotic Stress in Rice
Source: MDPI journal article supplement (doi:10.3390/plants11151928), 2022-07-25
Supplement: s1 [file s1]

**Table S1.** Physicochemical Properties of the 2R-MYB Type Proteins

| Name       | Number of amino acids | Molecular weight | Theoretical pI | Instability index | Grand average of hydropathicity (GRAVY) |
|------------|-----------------------|------------------|----------------|-------------------|-----------------------------------------|
| Os2R_MYB1  | 350                   | 38488.30         | 6.07           | 58.76             | -0.486                                  |
| Os2R_MYB2  | 294                   | 32501.60         | 9.40           | 55.91             | -0.584                                  |
| Os2R_MYB3  | 260                   | 27583.70         | 8.85           | 56.56             | -0.521                                  |
| Os2R_MYB4  | 264                   | 27979.34         | 5.73           | 60.22             | -0.286                                  |
| Os2R_MYB5  | 428                   | 47736.41         | 6.20           | 62.79             | -0.671                                  |
| Os2R_MYB6  | 293                   | 32507.01         | 5.68           | 56.09             | -0.589                                  |
| Os2R_MYB7  | 317                   | 33646.14         | 5.50           | 49.04             | -0.732                                  |
| Os2R_MYB8  | 357                   | 38499.69         | 5.70           | 61.29             | -0.590                                  |
| Os2R_MYB9  | 228                   | 25448.51         | 6.32           | 52.77             | -0.552                                  |
| Os2R_MYB10 | 318                   | 33868.21         | 8.27           | 63.41             | -0.363                                  |
| Os2R_MYB11 | 275                   | 29793.33         | 5.80           | 47.45             | -0.543                                  |
| Os2R_MYB12 | 301                   | 33199.94         | 5.81           | 53.22             | -0.543                                  |
| Os2R_MYB13 | 307                   | 32777.98         | 8.07           | 50.38             | -0.226                                  |
| Os2R_MYB14 | 298                   | 31761.19         | 4.88           | 60.41             | -0.427                                  |
| Os2R_MYB15 | 553                   | 59960.66         | 5.08           | 48.96             | -0.508                                  |
| Os2R_MYB16 | 413                   | 44329.57         | 6.24           | 64.04             | -0.575                                  |
| Os2R_MYB17 | 448                   | 48075.22         | 7.75           | 58.95             | -0.439                                  |
| Os2R_MYB18 | 287                   | 30969.95         | 9.30           | 61.61             | -0.572                                  |
| Os2R_MYB19 | 276                   | 31029.37         | 6.86           | 69.20             | -0.837                                  |
| Os2R_MYB20 | 250                   | 27339.30         | 9.91           | 61.76             | -0.439                                  |
| Os2R_MYB21 | 297                   | 32118.73         | 7.80           | 59.03             | -0.602                                  |
| Os2R_MYB22 | 301                   | 32322.17         | 8.85           | 72.59             | -0.630                                  |
| Os2R_MYB23 | 470                   | 51199.37         | 8.50           | 55.69             | -0.677                                  |
| Os2R_MYB24 | 342                   | 36317.56         | 6.60           | 47.78             | -0.395                                  |
| Os2R_MYB25 | 289                   | 32082.79         | 5.35           | 55.35             | -0.679                                  |
| Os2R_MYB26 | 258                   | 28468.84         | 5.92           | 60.17             | -0.618                                  |
| Os2R_MYB27 | 317                   | 34205.52         | 5.25           | 68.89             | -0.731                                  |
| Os2R_MYB28 | 300                   | 32154.28         | 6.96           | 42.16             | -0.353                                  |
| Os2R_MYB29 | 340                   | 36443.44         | 4.67           | 43.95             | -0.580                                  |
| Os2R_MYB30 | 255                   | 27759.31         | 5.20           | 50.01             | -0.471                                  |
| Os2R_MYB31 | 377                   | 40296.57         | 6.25           | 58.20             | -0.352                                  |
| Os2R_MYB32 | 563                   | 58761.40         | 5.59           | 52.68             | -0.410                                  |
| Os2R_MYB33 | 247                   | 28768.39         | 6.60           | 72.96             | -0.879                                  |
| Os2R_MYB34 | 242                   | 25320.00         | 9.82           | 57.06             | -0.305                                  |
| Os2R_MYB35 | 189                   | 22195.49         | 11.36          | 89.07             | -0.644                                  |
| Os2R_MYB36 | 329                   | 36042.85         | 4.84           | 59.44             | -0.613                                  |
| Os2R_MYB37 | 307                   | 32479.70         | 6.59           | 55.58             | -0.262                                  |
| Os2R_MYB38 | 317                   | 33199.38         | 8.17           | 51.34             | -0.269                                  |
| Os2R_MYB39 | 321                   | 34048.96         | 6.16           | 54.02             | -0.543                                  |
| Os2R_MYB40 | 522                   | 55458.72         | 5.13           | 65.83             | -0.476                                  |
| Os2R_MYB41 | 245                   | 27525.51         | 8.22           | 57.26             | -0.906                                  |
| Os2R_MYB42 | 321                   | 35339.26         | 7.61           | 55.53             | -0.486                                  |

| Name       | Number of amino acids | Molecular weight | Theoretical pI | Instability index | Grand average of hydropathicity (GRAVY) |
|------------|-----------------------|------------------|----------------|-------------------|-----------------------------------------|
| Os2R_MYB43 | 345                   | 36392.82         | 7.24           | 46.94             | -0.417                                  |
| Os2R_MYB44 | 372                   | 39699.24         | 5.77           | 40.31             | -0.537                                  |
| Os2R_MYB45 | 281                   | 30659.25         | 7.09           | 67.63             | -0.640                                  |
| Os2R_MYB46 | 257                   | 27914.37         | 6.56           | 56.90             | -0.591                                  |
| Os2R_MYB47 | 273                   | 29536.02         | 6.07           | 54.84             | -0.514                                  |
| Os2R_MYB48 | 298                   | 31799.50         | 6.00           | 38.87             | -0.365                                  |
| Os2R_MYB49 | 343                   | 37110.93         | 7.69           | 70.61             | -0.543                                  |
| Os2R_MYB50 | 340                   | 36876.57         | 6.20           | 52.17             | -0.363                                  |
| Os2R_MYB51 | 371                   | 39768.54         | 4.94           | 56.25             | -0.518                                  |
| Os2R_MYB52 | 310                   | 33960.04         | 5.65           | 66.07             | -0.388                                  |
| Os2R_MYB53 | 427                   | 47151.65         | 6.12           | 61.20             | -0.656                                  |
| Os2R_MYB54 | 303                   | 31528.14         | 6.61           | 59.62             | -0.450                                  |
| Os2R_MYB55 | 260                   | 28351.23         | 9.06           | 51.43             | -0.608                                  |
| Os2R_MYB56 | 182                   | 20381.59         | 7.11           | 62.40             | -0.723                                  |
| Os2R_MYB57 | 315                   | 34031.20         | 6.49           | 60.09             | -0.533                                  |
| Os2R_MYB58 | 394                   | 45133.28         | 5.19           | 47.06             | -0.786                                  |
| Os2R_MYB59 | 312                   | 33606.16         | 5.18           | 47.51             | -0.395                                  |
| Os2R_MYB60 | 289                   | 30551.35         | 6.09           | 60.18             | -0.299                                  |
| Os2R_MYB61 | 249                   | 26862.71         | 5.97           | 45.85             | -0.492                                  |
| Os2R_MYB62 | 367                   | 39053.13         | 5.62           | 50.32             | -0.387                                  |
| Os2R_MYB63 | 271                   | 28895.07         | 6.82           | 47.41             | -0.469                                  |
| Os2R_MYB64 | 322                   | 36126.04         | 5.82           | 53.75             | -0.468                                  |
| Os2R_MYB65 | 169                   | 19018.54         | 10.77          | 91.68             | -0.590                                  |
| Os2R_MYB66 | 682                   | 75878.94         | 7.31           | 54.68             | -0.771                                  |
| Os2R_MYB67 | 438                   | 47467.99         | 5.71           | 54.42             | -0.544                                  |
| Os2R_MYB68 | 329                   | 35943.62         | 8.25           | 56.95             | -0.603                                  |
| Os2R_MYB69 | 192                   | 22123.39         | 10.40          | 82.19             | -0.665                                  |
| Os2R_MYB70 | 400                   | 41655.86         | 6.40           | 49.84             | -0.237                                  |
| Os2R_MYB71 | 368                   | 39929.04         | 6.59           | 55.13             | -0.408                                  |
| Os2R_MYB72 | 341                   | 35258.90         | 5.90           | 47.08             | -0.498                                  |
| Os2R_MYB73 | 300                   | 33702.95         | 5.52           | 59.14             | -0.502                                  |
| Os2R_MYB74 | 359                   | 39954.66         | 6.13           | 50.48             | -0.647                                  |
| Os2R_MYB75 | 316                   | 34397.20         | 5.89           | 62.48             | -0.644                                  |
| Os2R_MYB76 | 309                   | 34282.98         | 5.41           | 60.33             | -0.511                                  |
| Os2R_MYB77 | 357                   | 39826.53         | 6.15           | 59.04             | -0.732                                  |
| Os2R_MYB78 | 310                   | 32785.77         | 7.69           | 50.15             | -0.592                                  |
| Os2R_MYB79 | 200                   | 21605.32         | 6.12           | 65.11             | -0.458                                  |
| Os2R_MYB80 | 357                   | 36754.20         | 6.10           | 47.90             | -0.178                                  |
| Os2R_MYB81 | 243                   | 26999.11         | 9.10           | 55.43             | -0.554                                  |
| Os2R_MYB82 | 279                   | 30935.94         | 5.03           | 54.69             | -0.506                                  |
| Os2R_MYB83 | 321                   | 33068.81         | 8.17           | 48.20             | -0.540                                  |
| Os2R_MYB84 | 377                   | 40137.68         | 6.06           | 53.99             | -0.427                                  |
| Os2R_MYB85 | 285                   | 31171.89         | 5.83           | 53.16             | -0.570                                  |

| Name       | Number of amino acids | Molecular weight | Theoretical pI | Instability index | Grand average of hydropathicity (GRAVY) |
|------------|-----------------------|------------------|----------------|-------------------|-----------------------------------------|
| Os2R_MYB86 | 251                   | 28224.49         | 9.04           | 48.25             | -0.543                                  |
| Os2R_MYB87 | 276                   | 30064.68         | 7.71           | 59.19             | -0.651                                  |
| Os2R_MYB88 | 294                   | 31656.64         | 5.22           | 68.39             | -0.411                                  |
| Os2R_MYB89 | 267                   | 28815.03         | 9.85           | 59.91             | -0.625                                  |
| Os2R_MYB90 | 330                   | 36061.25         | 6.26           | 48.71             | -0.560                                  |
| Os2R_MYB91 | 285                   | 32783.44         | 5.60           | 54.26             | -0.800                                  |
| Os2R_MYB92 | 237                   | 27226.09         | 8.82           | 71.15             | -0.665                                  |
| Os2R_MYB93 | 311                   | 34063.18         | 5.59           | 57.25             | -0.479                                  |
| Os2R_MYB94 | 266                   | 28647.88         | 8.48           | 65.22             | -0.647                                  |
| Os2R_MYB95 | 845                   | 93326.61         | 5.17           | 66.41             | -0.695                                  |
| Os2R_MYB96 | 409                   | 43722.43         | 6.33           | 59.81             | -0.521                                  |
| Os2R_MYB97 | 300                   | 33864.46         | 5.37           | 50.19             | -0.718                                  |
| Os2R_MYB98 | 242                   | 27843.81         | 8.39           | 67.38             | -0.671                                  |
| Os2R_MYB99 | 297                   | 32057.24         | 8.86           | 35.28             | -0.419                                  |
| Average    | 324                   | 35218.68         | 6.80           | 57.15             | -0.536                                  |
