# Supplementary material for: Genome-Wide Identification of R2R3-MYB Transcription Factor and Expression Analysis under Abiotic Stress in Rice
Source: MDPI journal article supplement (doi:10.3390/plants11151928), 2022-07-25
Supplement: s1 [file s1]

**Table S7.** Quantitative RT-PCR Primers

| Quantitative RT-PCR Primers |                          |
|-----------------------------|--------------------------|
| Name                        | Sequence (5'-3')         |
| qRT-Os2R_MYB1-F             | GCTAAGATGGCTCAACTA       |
| qRT-Os2R_MYB1-R             | CCTCCAGTAGTTCTTGAT       |
| qRT-Os2R_MYB2-F             | GGACTGAAGAAATATGGG       |
| qRT-Os2R_MYB2-R             | GATGTGTTGGACTGATTG       |
| qRT-Os2R_MYB3-F             | GACAACGAGATCAAGAAC       |
| qRT-Os2R_MYB3-R             | GTGAGAGAAGGTGTTGAA       |
| qRT-Os2R_MYB7-F             | GACATCATCCTCAACCTC       |
| qRT-Os2R_MYB7-R             | CGAGTTCCAGTAGTTCTT       |
| qRT-Os2R_MYB15-F            | TACCCATCTATCCTACCA       |
| qRT-Os2R_MYB15-R            | CCAAGGAGATTGCTTATAG      |
| qRT-Os2R_MYB16-F            | GTGGTGTTATGAAGAGAG       |
| qRT-Os2R_MYB16-R            | CAGGTCCTACATTGTATG       |
| qRT-Os2R_MYB18-F            | CTCATCATCAAGCTCCAC       |
| qRT-Os2R_MYB18-R            | CGTGTTCCAGTAGTTCTT       |
| qRT-Os2R_MYB21-F            | GGTGAAGAACTACTGGAA       |
| qRT-Os2R_MYB21-R            | GTGATGATGATGGTGATG       |
| qRT-Os2R_MYB23-F            | CATAACAACCTGGGAACTG      |
| qRT-Os2R_MYB23-R            | GCCATTCTACACCACTTA       |
| qRT-Os2R_MYB36-F            | CTGCTCGTCAACTACATC       |
| qRT-Os2R_MYB36-R            | GTTCTTGATCTCGTTGTC       |
| qRT-Os2R_MYB47-F            | GAGATGGATCAATTACCTG      |
| qRT-Os2R_MYB47-R            | GTTCCAGTAGTTCTTCAC       |
| qRT-Os2R_MYB51-F            | GTCGCCTACATTCAGAAG       |
| qRT-Os2R_MYB51-R            | CTTGATGATGGTCTCCTC       |
| qRT-Os2R_MYB56-F            | AGGGCTAGAGAAATATGG       |
| qRT-Os2R_MYB56-R            | CTGTCGGATGAAGAACTT       |
| qRT-Os2R_MYB76-F            | GGCAATAGGTGGTCTAAG       |
| qRT-Os2R_MYB76-R            | CCGTGTTCTTTCTCTCTG       |
| qRT-Os2R_MYB81-F            | GACGACCTCATCATCAAG       |
| qRT-Os2R_MYB81-R            | CGTGTTCCAGTAGTTCTT       |
| qRT-Os2R_MYB89-F            | AATAGCTCGCTATGCTTC       |
| qRT-Os2R_MYB89-R            | GTACCGTTAAACGACTTG       |
| qRT-Os2R_MYB90-F            | CAAGAAGAAGGTGAAGAG       |
| qRT-Os2R_MYB90-R            | GTTGTTAGGGTTGTAGTAG      |
| qRT-Os2R_MYB93-F            | CAACTCCACTTCATCCTC       |
| qRT-Os2R_MYB93-R            | GAGATGTTGTCCATGCTG       |
| qRT-Os2R_MYB98-F            | AGTGAGAGAAGAGATACG       |
| qRT-Os2R_MYB98-R            | CCTGATACTTTGGCAATG       |
| qRT-Os2R_MYB99-F            | CAGATGGTGATGATGATG       |
| qRT-Os2R_MYB99-R            | CTATGGCTGTCTTGTATG       |
| OsActin1-F                  | CCCTCCTGAAAGGAAGTACAGTGT |
| OsActin1-R                  | ACTCGTCGTA CT CAGCCTTGG  |
| OsGAPDH-F                   | GGGCTGCTAGCTTCAACATC     |
| OsGAPDH-R                   | TTGATTGCAGCCTTGATCTG     |
