# Supplementary material for: Genome-Wide Identification of R2R3-MYB Transcription Factor and Expression Analysis under Abiotic Stress in Rice
Source: MDPI journal article supplement (doi:10.3390/plants11151928), 2022-07-25
Supplement: s1 [file s1]

**Table S2.** Statistical Analysis of the Intron Numbers of 99 Os2R\_MYB Genes

| Name              | Gene ID                 | Intron Numbers | Gene Numbers | Percentages |
|-------------------|-------------------------|----------------|--------------|-------------|
| <i>Os2R_MYB6</i>  | <i>LOC_Os01g19330.1</i> | 0              | 10           | 10.10%      |
| <i>Os2R_MYB20</i> | <i>LOC_Os01g74590.1</i> |                |              |             |
| <i>Os2R_MYB22</i> | <i>LOC_Os02g09480.1</i> |                |              |             |
| <i>Os2R_MYB34</i> | <i>LOC_Os03g13310.1</i> |                |              |             |
| <i>Os2R_MYB35</i> | <i>LOC_Os03g19630.1</i> |                |              |             |
| <i>Os2R_MYB37</i> | <i>LOC_Os03g26130.1</i> |                |              |             |
| <i>Os2R_MYB54</i> | <i>LOC_Os05g28320.1</i> |                |              |             |
| <i>Os2R_MYB65</i> | <i>LOC_Os06g14010.1</i> |                |              |             |
| <i>Os2R_MYB69</i> | <i>LOC_Os07g25370.1</i> |                |              |             |
| <i>Os2R_MYB79</i> | <i>LOC_Os08g34960.1</i> |                |              |             |
| <i>Os2R_MYB2</i>  | <i>LOC_Os01g04930.1</i> | 1              | 24           | 24.24%      |
| <i>Os2R_MYB3</i>  | <i>LOC_Os01g07450.1</i> |                |              |             |
| <i>Os2R_MYB7</i>  | <i>LOC_Os01g19970.1</i> |                |              |             |
| <i>Os2R_MYB9</i>  | <i>LOC_Os01g45090.1</i> |                |              |             |
| <i>Os2R_MYB11</i> | <i>LOC_Os01g50110.1</i> |                |              |             |
| <i>Os2R_MYB16</i> | <i>LOC_Os01g63160.1</i> |                |              |             |
| <i>Os2R_MYB18</i> | <i>LOC_Os01g65370.1</i> |                |              |             |
| <i>Os2R_MYB19</i> | <i>LOC_Os01g74410.1</i> |                |              |             |
| <i>Os2R_MYB26</i> | <i>LOC_Os02g41510.1</i> |                |              |             |
| <i>Os2R_MYB29</i> | <i>LOC_Os02g46780.1</i> |                |              |             |
| <i>Os2R_MYB36</i> | <i>LOC_Os03g20090.1</i> |                |              |             |
| <i>Os2R_MYB50</i> | <i>LOC_Os04g50680.1</i> |                |              |             |
| <i>Os2R_MYB55</i> | <i>LOC_Os05g35500.1</i> |                |              |             |
| <i>Os2R_MYB56</i> | <i>LOC_Os05g37060.1</i> |                |              |             |
| <i>Os2R_MYB57</i> | <i>LOC_Os05g37730.1</i> |                |              |             |
| <i>Os2R_MYB62</i> | <i>LOC_Os06g02250.1</i> |                |              |             |
| <i>Os2R_MYB72</i> | <i>LOC_Os07g43580.1</i> |                |              |             |
| <i>Os2R_MYB73</i> | <i>LOC_Os07g48870.1</i> |                |              |             |
| <i>Os2R_MYB81</i> | <i>LOC_Os08g43550.1</i> |                |              |             |
| <i>Os2R_MYB85</i> | <i>LOC_Os09g36250.1</i> |                |              |             |
| <i>Os2R_MYB86</i> | <i>LOC_Os09g36730.1</i> |                |              |             |
| <i>Os2R_MYB89</i> | <i>LOC_Os11g10130.1</i> |                |              |             |
| <i>Os2R_MYB93</i> | <i>LOC_Os12g03150.1</i> |                |              |             |
| <i>Os2R_MYB96</i> | <i>LOC_Os12g33070.1</i> |                |              |             |
| <i>Os2R_MYB1</i>  | <i>LOC_Os01g03720.1</i> |                |              |             |
| <i>Os2R_MYB4</i>  | <i>LOC_Os01g09590.1</i> |                |              |             |
| <i>Os2R_MYB5</i>  | <i>LOC_Os01g18240.1</i> |                |              |             |
| <i>Os2R_MYB8</i>  | <i>LOC_Os01g36460.1</i> |                |              |             |
| <i>Os2R_MYB10</i> | <i>LOC_Os01g49160.1</i> |                |              |             |
| <i>Os2R_MYB12</i> | <i>LOC_Os01g50720.1</i> |                |              |             |
| <i>Os2R_MYB14</i> | <i>LOC_Os01g52410.1</i> |                |              |             |
| <i>Os2R_MYB15</i> | <i>LOC_Os01g59660.1</i> |                |              |             |

|                   |                         |   |    |        |
|-------------------|-------------------------|---|----|--------|
| <i>Os2R_MYB17</i> | <i>LOC_Os01g63680.1</i> | 2 | 59 | 59.60% |
| <i>Os2R_MYB21</i> | <i>LOC_Os02g02370.1</i> |   |    |        |
| <i>Os2R_MYB23</i> | <i>LOC_Os02g17190.1</i> |   |    |        |
| <i>Os2R_MYB24</i> | <i>LOC_Os02g36890.1</i> |   |    |        |
| <i>Os2R_MYB25</i> | <i>LOC_Os02g40530.1</i> |   |    |        |
| <i>Os2R_MYB27</i> | <i>LOC_Os02g42850.2</i> |   |    |        |
| <i>Os2R_MYB28</i> | <i>LOC_Os02g42870.1</i> |   |    |        |
| <i>Os2R_MYB30</i> | <i>LOC_Os02g49986.1</i> |   |    |        |
| <i>Os2R_MYB31</i> | <i>LOC_Os02g51799.1</i> |   |    |        |
| <i>Os2R_MYB33</i> | <i>LOC_Os03g04900.1</i> |   |    |        |
| <i>Os2R_MYB38</i> | <i>LOC_Os03g27090.1</i> |   |    |        |
| <i>Os2R_MYB39</i> | <i>LOC_Os03g29614.1</i> |   |    |        |
| <i>Os2R_MYB40</i> | <i>LOC_Os03g38210.1</i> |   |    |        |
| <i>Os2R_MYB41</i> | <i>LOC_Os03g51110.1</i> |   |    |        |
| <i>Os2R_MYB42</i> | <i>LOC_Os03g56090.1</i> |   |    |        |
| <i>Os2R_MYB43</i> | <i>LOC_Os04g38740.1</i> |   |    |        |
| <i>Os2R_MYB44</i> | <i>LOC_Os04g39470.1</i> |   |    |        |
| <i>Os2R_MYB45</i> | <i>LOC_Os04g42950.1</i> |   |    |        |
| <i>Os2R_MYB46</i> | <i>LOC_Os04g43680.1</i> |   |    |        |
| <i>Os2R_MYB47</i> | <i>LOC_Os04g45020.1</i> |   |    |        |
| <i>Os2R_MYB48</i> | <i>LOC_Os04g45060.1</i> |   |    |        |
| <i>Os2R_MYB49</i> | <i>LOC_Os04g46384.1</i> |   |    |        |
| <i>Os2R_MYB51</i> | <i>LOC_Os04g50770.1</i> |   |    |        |
| <i>Os2R_MYB52</i> | <i>LOC_Os05g04210.1</i> |   |    |        |
| <i>Os2R_MYB53</i> | <i>LOC_Os05g04820.1</i> |   |    |        |
| <i>Os2R_MYB59</i> | <i>LOC_Os05g46610.1</i> |   |    |        |
| <i>Os2R_MYB60</i> | <i>LOC_Os05g48010.1</i> |   |    |        |
| <i>Os2R_MYB61</i> | <i>LOC_Os05g49310.1</i> |   |    |        |
| <i>Os2R_MYB63</i> | <i>LOC_Os06g10350.1</i> |   |    |        |
| <i>Os2R_MYB64</i> | <i>LOC_Os06g11780.1</i> |   |    |        |
| <i>Os2R_MYB67</i> | <i>LOC_Os07g12130.1</i> |   |    |        |
| <i>Os2R_MYB68</i> | <i>LOC_Os07g14110.1</i> |   |    |        |
| <i>Os2R_MYB70</i> | <i>LOC_Os07g31470.1</i> |   |    |        |
| <i>Os2R_MYB71</i> | <i>LOC_Os07g37210.1</i> |   |    |        |
| <i>Os2R_MYB74</i> | <i>LOC_Os08g05520.1</i> |   |    |        |
| <i>Os2R_MYB75</i> | <i>LOC_Os08g15020.1</i> |   |    |        |
| <i>Os2R_MYB76</i> | <i>LOC_Os08g33150.1</i> |   |    |        |
| <i>Os2R_MYB77</i> | <i>LOC_Os08g33660.1</i> |   |    |        |
| <i>Os2R_MYB78</i> | <i>LOC_Os08g33940.1</i> |   |    |        |
| <i>Os2R_MYB80</i> | <i>LOC_Os08g37970.1</i> |   |    |        |
| <i>Os2R_MYB82</i> | <i>LOC_Os09g23620.1</i> |   |    |        |
| <i>Os2R_MYB83</i> | <i>LOC_Os09g24800.1</i> |   |    |        |
| <i>Os2R_MYB84</i> | <i>LOC_Os09g26170.1</i> |   |    |        |

|                   |                         |   |   |       |
|-------------------|-------------------------|---|---|-------|
| <i>Os2R_MYB87</i> | <i>LOC_Os10g33810.1</i> |   |   |       |
| <i>Os2R_MYB88</i> | <i>LOC_Os10g35660.1</i> |   |   |       |
| <i>Os2R_MYB90</i> | <i>LOC_Os11g35390.1</i> |   |   |       |
| <i>Os2R_MYB91</i> | <i>LOC_Os11g45740.1</i> |   |   |       |
| <i>Os2R_MYB92</i> | <i>LOC_Os11g47460.1</i> |   |   |       |
| <i>Os2R_MYB94</i> | <i>LOC_Os12g07640.1</i> |   |   |       |
| <i>Os2R_MYB97</i> | <i>LOC_Os12g37690.1</i> |   |   |       |
| <i>Os2R_MYB98</i> | <i>LOC_Os12g37970.1</i> |   |   |       |
| <i>Os2R_MYB13</i> | <i>LOC_Os01g51260.1</i> | 3 | 2 | 2.02% |
| <i>Os2R_MYB58</i> | <i>LOC_Os05g41166.1</i> |   |   |       |
| <i>Os2R_MYB32</i> | <i>LOC_Os02g54520.1</i> | 5 | 2 | 2.02% |
| <i>Os2R_MYB99</i> | <i>LOC_Os12g41920.2</i> |   |   |       |
| <i>Os2R_MYB66</i> | <i>LOC_Os06g40330.1</i> | 6 | 1 | 1.01% |
| <i>Os2R_MYB95</i> | <i>LOC_Os12g13570.1</i> | 7 | 1 | 1.01% |
