# Supplementary material for: Genome-Wide Identification of R2R3-MYB Transcription Factor and Expression Analysis under Abiotic Stress in Rice
Source: Plants (Basel). 2022 Jul 25;11(15):1928. doi: 10.3390/plants11151928 (PMC9330779; doi:10.3390/plants11151928)
Supplement: Supplementary file 1 [file plants-11-01928-s001.zip]

Archive with 9 entries (9 files):
- Figure S1 Multiple sequence alignments of Os2R_MYB proteins.pdf
- Figure S2 Relative gene expression of 20 Os2R_MYBs under PEG and CdCl2 stress treatments.pdf
- Table S1 Physicochemical Properties of the 2R-MYB Type Proteins.pdf
- Table S2 Statistical analysis of the intron numbers of 99 Os2R_MYB genes.pdf
- Table S3 R2R3_MYB proteins interaction network construct.xlsx
- Table S4 R2R3_MYB proteins interaction network protein annotations.xlsx
- Table S5 R2R3_MYB proteins interaction network functional annotations.xlsx
- Table S6 Statistical analysis of Os2R_MYB genes expression level under the PEG and CdCl2 stress.pdf
- Table S7 Quantitative RT-PCR Primers.pdf
