# Supplementary material for: Genome-Wide Identification of R2R3-MYB Transcription Factor and Expression Analysis under Abiotic Stress in Rice
Source: Plants (Basel). 2022 Jul 25;11(15):1928. doi: 10.3390/plants11151928 (PMC9330779; doi:10.3390/plants11151928)
Supplement: Supplementary file 1 [file plants-11-01928-s001.zip › Table S3 R2R3_MYB proteins interaction network construct.xlsx]

## Sheet: string_interactions_short
#node1	node2	node1_string_id	node2_string_id	neighborhood_on_chromosome	gene_fusion	phylogenetic_cooccurrence	homology	coexpression	experimentally_determined_interaction	database_annotated	automated_textmining	combined_score
CYCB2-2	Os2R_MYB95	4530.OS06T0726800-01	4530.OS12T0238000-00	0	0	0	0	0.869	0.107	0.153	0.095	0.898
OS04T0639200-01	Os2R_MYB86	4530.OS04T0639200-01	4530.OS09T0538400-01	0	0	0	0	0	0	0	0.915	0.915
OS06T0182300-01	Os2R_MYB13	4530.OS06T0182300-01	4530.OS01T0709000-01	0	0	0	0	0	0	0.053	0.918	0.919
OS06T0182300-01	Os2R_MYB74	4530.OS06T0182300-01	4530.OS08T0151300-01	0	0	0	0	0	0	0.053	0.675	0.679
OS06T0182300-01	TDL1A	4530.OS06T0182300-01	4530.OS12T0472500-01	0	0	0	0	0	0	0	0.921	0.921
Os2R_MYB1	Os2R_MYB24	4530.OS01T0128000-01	4530.OS02T0579300-00	0	0	0	0	0	0	0	0.497	0.497
Os2R_MYB1	Os2R_MYB57	4530.OS01T0128000-01	4530.OS05T0449900-01	0	0	0	0	0.056	0.069	0	0.535	0.555
Os2R_MYB1	Os2R_MYB2	4530.OS01T0128000-01	4530.OS01T0142500-01	0	0	0	0	0.056	0.069	0	0.535	0.555
Os2R_MYB11	OsJ_07944	4530.OS01T0695900-01	4530.OS02T0682500-01	0	0	0	0	0	0.057	0	0.922	0.923
Os2R_MYB12	Os2R_MYB24	4530.OS01T0702700-01	4530.OS02T0579300-00	0	0	0	0	0	0	0	0.405	0.405
Os2R_MYB13	TDL1A	4530.OS01T0709000-01	4530.OS12T0472500-01	0	0	0	0	0	0	0	0.92	0.92
Os2R_MYB19	Os2R_MYB92	4530.OS01T0975300-02	4530.OS11T0700500-01	0	0	0	0.845	0.472	0	0	0	0.472
Os2R_MYB19	OsJ_07944	4530.OS01T0975300-02	4530.OS02T0682500-01	0	0	0	0	0	0.057	0	0.5	0.508
Os2R_MYB2	Os2R_MYB29	4530.OS01T0142500-01	4530.OS02T0695200-01	0	0	0	0	0.056	0.069	0	0.415	0.44
Os2R_MYB2	Os2R_MYB51	4530.OS01T0142500-01	4530.OS04T0594100-01	0	0	0	0	0.056	0.069	0	0.415	0.44
Os2R_MYB24	OsJ_07944	4530.OS02T0579300-00	4530.OS02T0682500-01	0	0	0	0	0	0.057	0	0.46	0.469
Os2R_MYB24	Os2R_MYB54	4530.OS02T0579300-00	4530.OS09T0106700-01	0	0	0	0	0	0	0	0.503	0.503
Os2R_MYB24	Os2R_MYB79	4530.OS02T0579300-00	4530.OS08T0450900-00	0	0	0	0	0	0	0	0.503	0.503
Os2R_MYB24	Os2R_MYB89	4530.OS02T0579300-00	4530.OS11T0207600-00	0	0	0	0	0	0	0	0.581	0.581
Os2R_MYB29	OsJ_07944	4530.OS02T0695200-01	4530.OS02T0682500-01	0	0	0	0	0	0.057	0	0.467	0.475
Os2R_MYB29	Os2R_MYB57	4530.OS02T0695200-01	4530.OS05T0449900-01	0	0	0	0	0.056	0.069	0	0.533	0.553
Os2R_MYB40	Os2R_MYB66	4530.OS03T0578900-00	4530.OS06T0605600-01	0	0	0	0	0	0	0	0.527	0.527
Os2R_MYB41	Os2R_MYB66	4530.OS03T0720800-01	4530.OS06T0605600-01	0	0	0	0	0	0	0	0.506	0.506
Os2R_MYB46	Os2R_MYB57	4530.OS02T0624300-01	4530.OS05T0449900-01	0	0	0	0	0.056	0.069	0	0.474	0.497
Os2R_MYB46	Os2R_MYB71	4530.OS02T0624300-01	4530.OS07T0558100-00	0	0	0	0.9	0.532	0	0	0.471	0.552
Os2R_MYB47	OsJ_07944	4530.OS04T0532800-01	4530.OS02T0682500-01	0	0	0	0	0	0.057	0	0.396	0.406
Os2R_MYB48	OsJ_07944	4530.OS02T0641900-01	4530.OS02T0682500-01	0	0	0	0	0	0.057	0	0.406	0.415
Os2R_MYB49	Os2R_MYB66	4530.OS06T0679400-01	4530.OS06T0605600-01	0	0	0	0	0	0	0	0.527	0.527
Os2R_MYB5	Os2R_MYB96	4530.OS01T0285300-01	4530.OS05T0140100-01	0	0	0	0.976	0.448	0	0	0	0.448
Os2R_MYB50	Os2R_MYB99	4530.OS04T0593200-01	4530.OS12T0613300-02	0	0	0	0	0	0	0	0.523	0.523
Os2R_MYB51	OsJ_07944	4530.OS04T0594100-01	4530.OS02T0682500-01	0	0	0	0	0	0.057	0	0.467	0.475
Os2R_MYB51	Os2R_MYB57	4530.OS04T0594100-01	4530.OS05T0449900-01	0	0	0	0	0.056	0.069	0	0.641	0.656
Os2R_MYB55	Os2R_MYB56	4530.OS05T0429900-01	4530.OS05T0442400-01	0	0	0	0	0.056	0.069	0	0.393	0.419
Os2R_MYB56	Os2R_MYB63	4530.OS05T0442400-01	4530.OS01T0874300-01	0	0	0	0	0.056	0.069	0	0.393	0.419
Os2R_MYB56	Os2R_MYB94	4530.OS05T0442400-01	4530.OS11T0180900-00	0	0	0	0	0.056	0.069	0	0.393	0.419
Os2R_MYB57	Os2R_MYB6	4530.OS05T0449900-01	4530.OS01T0298400-01	0	0	0	0	0.056	0.069	0	0.746	0.757
Os2R_MYB57	Os2R_MYB97	4530.OS05T0449900-01	4530.OS11T0684000-01	0	0	0	0	0.056	0.069	0	0.56	0.579
Os2R_MYB57	Os2R_MYB87	4530.OS05T0449900-01	4530.OS10T0478300-01	0	0	0	0	0.056	0.069	0	0.569	0.588
Os2R_MYB57	Os2R_MYB86	4530.OS05T0449900-01	4530.OS09T0538400-01	0	0	0	0	0.056	0.069	0	0.767	0.777
Os2R_MYB58	Os2R_MYB66	4530.OS05T0490600-00	4530.OS06T0605600-01	0	0	0	0	0	0	0	0.444	0.444
Os2R_MYB66	Os2R_MYB97	4530.OS06T0605600-01	4530.OS11T0684000-01	0	0	0	0	0	0	0	0.404	0.404
Os2R_MYB66	Os2R_MYB89	4530.OS06T0605600-01	4530.OS11T0207600-00	0	0	0	0	0	0	0	0.534	0.534
Os2R_MYB7	OsJ_07944	4530.OS01T0305900-01	4530.OS02T0682500-01	0	0	0	0	0	0.057	0	0.65	0.655
Os2R_MYB71	OsJ_07944	4530.OS07T0558100-00	4530.OS02T0682500-01	0	0	0	0	0	0.057	0	0.406	0.415
Os2R_MYB74	Os2R_MYB96	4530.OS08T0151300-01	4530.OS05T0140100-01	0	0	0	0.832	0.56	0	0	0	0.56
Os2R_MYB74	TDL1A	4530.OS08T0151300-01	4530.OS12T0472500-01	0	0	0	0	0	0	0	0.642	0.642
Os2R_MYB77	OsJ_07944	4530.OS04T0461000-01	4530.OS02T0682500-01	0	0	0	0	0	0.057	0	0.46	0.469
Os2R_MYB86	OsJ_07944	4530.OS09T0538400-01	4530.OS02T0682500-01	0	0	0	0	0	0.057	0	0.619	0.625
Os2R_MYB87	Os2R_MYB99	4530.OS10T0478300-01	4530.OS12T0613300-02	0	0	0	0	0	0	0	0.409	0.408
Os2R_MYB89	OsJ_07944	4530.OS11T0207600-00	4530.OS02T0682500-01	0	0	0	0	0	0.057	0	0.526	0.533
Os2R_MYB9	OsJ_07944	4530.OS01T0637800-00	4530.OS02T0682500-01	0	0	0	0	0	0.057	0	0.532	0.539
Os2R_MYB92	OsJ_07944	4530.OS11T0700500-01	4530.OS02T0682500-01	0	0	0	0	0	0.057	0	0.5	0.508
Os2R_MYB98	OsJ_07944	4530.OS12T0567300-00	4530.OS02T0682500-01	0	0	0	0	0	0.057	0	0.5	0.508
