# Supplementary material for: Genome-Wide Identification of R2R3-MYB Transcription Factor and Expression Analysis under Abiotic Stress in Rice
Source: Plants (Basel). 2022 Jul 25;11(15):1928. doi: 10.3390/plants11151928 (PMC9330779; doi:10.3390/plants11151928)
Supplement: Supplementary file 1 [file plants-11-01928-s001.zip › Table S4 R2R3_MYB proteins interaction network protein annotations.xlsx]

## Sheet: string_protein_annotations
#node	identifier	domain_summary_url	annotation
BIP1	4530.OS02T0115900-02	Dnak-type molecular chaperone bip; os02g0115900 protein; putative dnak-type molecular chaperone bip; Key chaperone involved in folding of secretory proteins in the endoplasmic reticulum (ER) lumen (Probable). Involved in ER quality control for seed storage proteins during seed maturation . Functions as a sensor of the ER stress response, and provides suitable conditions for the production of secr…	https://smart.embl.de/smart/DDvec.cgi?smart=665:SIGNAL(1|25)+Pfam_HSP70(35|642)+
CESA7	4530.OS10T0467800-01	Cellulose synthase A catalytic subunit 7 [UDP-forming]; Catalytic subunit of cellulose synthase terminal complexes ('rosettes'), required for beta-1,4-glucan microfibril crystallization, a major mechanism of the cell wall formation (By similarity). Involved in the secondary cell wall formation; Belongs to the glycosyltransferase 2 family. Plant cellulose synthase subfamily	https://smart.embl.de/smart/DDvec.cgi?smart=1063:RING(18|63)+Pfam_Glyco_trans_2_3(728|890)+
CYCB2-2	4530.OS06T0726800-01	Cyclin-B2-2; Involved in the control of the cell cycle at the G2/M (mitosis) transition. May associate to CDKB2-1 and activate CDKB2- 1 kinase activity to promote cell division; Belongs to the cyclin family. Cyclin AB subfamily	https://smart.embl.de/smart/DDvec.cgi?smart=419:CYCLIN(200|284)+Cyclin_C(293|410)+
HOS66	4530.OS03T0123500-02	Homeobox protein knotted-1-like 3 ; Belongs to the TALE/KNOX homeobox family	https://smart.embl.de/smart/DDvec.cgi?smart=314:KNOX1(51|95)+KNOX2(106|161)+ELK(218|239)+HOX(240|305)+
OS01T0174000-00	4530.OS01T0174000-00	annotation not available	https://smart.embl.de/smart/DDvec.cgi?smart=347:BRLZ(252|316)+
OS01T0517900-00	4530.OS01T0517900-00	annotation not available	https://smart.embl.de/smart/DDvec.cgi?smart=354:Pfam_HSP70(1|345)+
OS02T0710900-01	4530.OS02T0710900-01	Os02g0710900 protein; Putative growth regulator ; Belongs to the heat shock protein 70 family	https://smart.embl.de/smart/DDvec.cgi?smart=902:SIGNAL(1|30)+Pfam_MreB_Mbl(132|425)+
OS03T0271400-01	4530.OS03T0271400-01	HEAT repeat family protein, expressed; Os03g0271400 protein	https://smart.embl.de/smart/DDvec.cgi?smart=384:Pfam_Fes1(8|96)+
OS04T0639200-01	4530.OS04T0639200-01	OSJNBb0003B01.8 protein; Os04g0639200 protein	https://smart.embl.de/smart/DDvec.cgi?smart=194:Pfam_Chloroa_b-bind(60|171)+
OS06T0182300-01	4530.OS06T0182300-01	Os06g0182300 protein	https://smart.embl.de/smart/DDvec.cgi?smart=814:Pfam_Glucan_synthase(233|324)+Pfam_Glucan_synthase(321|814)+
OS06T0483100-00	4530.OS06T0483100-00	annotation not available	https://smart.embl.de/smart/DDvec.cgi?smart=154:Pfam_HSP70(4|101)+
OS09T0512700-01	4530.OS09T0512700-01	Os09g0512700 protein; cDNA clone:001-029-B12, full insert sequence	https://smart.embl.de/smart/DDvec.cgi?smart=410:SIGNAL(1|37)+Pfam_Fes1(91|182)+
Os2R_MYB1	4530.OS01T0128000-01	Os01g0128000 protein; Uncharacterized protein	https://smart.embl.de/smart/DDvec.cgi?smart=350:SANT(29|79)+SANT(82|130)+
Os2R_MYB11	4530.OS01T0695900-01	Myb-related protein 1-like; Os01g0695900 protein; cDNA clone:002-141-A12, full insert sequence	https://smart.embl.de/smart/DDvec.cgi?smart=275:SANT(21|71)+SANT(74|122)+
Os2R_MYB12	4530.OS01T0702700-01	Os01g0702700 protein; Uncharacterized protein; cDNA clone:J023084H22, full insert sequence	https://smart.embl.de/smart/DDvec.cgi?smart=301:SANT(16|66)+SANT(69|117)+
Os2R_MYB13	4530.OS01T0709000-01	Os01g0709000 protein	https://smart.embl.de/smart/DDvec.cgi?smart=307:SANT(13|63)+SANT(66|114)+
Os2R_MYB14	4530.OS01T0722300-01	Blind-like; Os01g0722300 protein; cDNA, clone: J065154C10, full insert sequence	https://smart.embl.de/smart/DDvec.cgi?smart=298:SANT(13|64)+SANT(67|115)+
Os2R_MYB15	4530.OS01T0812000-02	Transcriptional activator of gibberellin-dependent alpha- amylase expression in aleurone cells. Involved in pollen and floral organs development. May bind to the 5'-TAACAAA-3' box of alpha-amylase promoter. Required for anther development Functions in parallel with UDT1 to regulate early anther development. Functions upstream of the transcription factor TDR and may positively regulate its transcr…	https://smart.embl.de/smart/DDvec.cgi?smart=553:SANT(41|91)+SANT(94|142)+
Os2R_MYB16	4530.OS01T0850400-01	cDNA clone:002-146-A03, full insert sequence; Os01g0850400 protein; Putative MYBY1 protein; Uncharacterized protein; cDNA clone:002-146-A03, full insert sequence	https://smart.embl.de/smart/DDvec.cgi?smart=413:SANT(110|159)+SANT(162|210)+
Os2R_MYB19	4530.OS01T0975300-02	Putative Myb factor protein; cDNA clone:001-040-C01, full insert sequence; cDNA clone:J013058H19, full insert sequence	https://smart.embl.de/smart/DDvec.cgi?smart=210:SANT(44|92)+
Os2R_MYB2	4530.OS01T0142500-01	cDNA clone:J013124L02, full insert sequence; MYB transcription factor; Myb transcription factor; Os01g0142500 protein; Uncharacterized protein; cDNA clone:J013124L02, full insert sequence	https://smart.embl.de/smart/DDvec.cgi?smart=294:SANT(25|76)+SANT(138|188)+
Os2R_MYB20	4530.OS01T0977300-01	Os01g0977300 protein; Putative tuber-specific and sucrose-responsive element binding factor; Uncharacterized protein; cDNA clone:002-169-B11, full insert sequence	https://smart.embl.de/smart/DDvec.cgi?smart=250:SANT(9|58)+SANT(61|109)+
Os2R_MYB22	4530.OS02T0187700-00	Os02g0187700 protein; Putative tuber-specific and sucrose-responsive element binding factor	https://smart.embl.de/smart/DDvec.cgi?smart=301:SANT(10|59)+SANT(62|110)+
Os2R_MYB23	4530.OS02T0271900-01	Os02g0271900 protein; Putative MYBY3 protein	https://smart.embl.de/smart/DDvec.cgi?smart=547:SANT(63|112)+SANT(115|163)+
Os2R_MYB24	4530.OS02T0579300-00	annotation not available	https://smart.embl.de/smart/DDvec.cgi?smart=246:SANT(14|63)+
Os2R_MYB25	4530.OS02T0618400-02	Os02g0618400 protein; Putative MYB transcription factor; cDNA clone:J013104N22, full insert sequence	https://smart.embl.de/smart/DDvec.cgi?smart=289:SANT(16|66)+SANT(69|117)+
Os2R_MYB29	4530.OS02T0695200-01	Os02g0695200 protein; Putative myb-related protein 1	https://smart.embl.de/smart/DDvec.cgi?smart=340:SANT(15|65)+SANT(68|116)+
Os2R_MYB30	4530.OS02T0732600-01	Os02g0732600 protein; Putative Myb51 protein	https://smart.embl.de/smart/DDvec.cgi?smart=255:SANT(13|63)+SANT(66|114)+
Os2R_MYB32	4530.OS02T0786400-00	annotation not available	https://smart.embl.de/smart/DDvec.cgi?smart=436:SANT(83|134)+SANT(137|185)+SCP(293|432)+
Os2R_MYB33	4530.OS03T0142600-00	Myb-like DNA-binding domain containing protein; Os03g0142600 protein	https://smart.embl.de/smart/DDvec.cgi?smart=247:SANT(14|64)+SANT(67|115)+COIL(135|176)+
Os2R_MYB34	4530.OS03T0236300-00	annotation not available	https://smart.embl.de/smart/DDvec.cgi?smart=349:SANT(25|74)+SANT(78|126)+
Os2R_MYB38	4530.OS03T0388600-01	Myb-like DNA-binding domain containing protein, expressed; Putative Myb protein; cDNA, clone: J100067L15, full insert sequence	https://smart.embl.de/smart/DDvec.cgi?smart=317:SANT(15|66)+SANT(69|117)+
Os2R_MYB4	4530.OS01T0191900-01	Os01g0191900 protein; Putative typical P-type R2R3 Myb protein; Uncharacterized protein	https://smart.embl.de/smart/DDvec.cgi?smart=264:SANT(13|64)+SANT(67|115)+
Os2R_MYB40	4530.OS03T0578900-00	Os03g0578900 protein; MYB family transcription factor	https://smart.embl.de/smart/DDvec.cgi?smart=528:SANT(191|241)+SANT(244|292)+
Os2R_MYB41	4530.OS03T0720800-01	Myb-like DNA-binding domain containing protein, expressed; Os03g0720800 protein; Putative Myb-like DNA-binding protein; Putative Myb/Myb-related protein; cDNA clone:J013060F16, full insert sequence	https://smart.embl.de/smart/DDvec.cgi?smart=245:SANT(3|52)+SANT(55|103)+
Os2R_MYB42	4530.OS03T0771100-01	Myb-like DNA-binding domain containing protein, expressed; Os03g0771100 protein; P-type R2R3 Myb proteind; cDNA clone:006-308-C02, full insert sequence	https://smart.embl.de/smart/DDvec.cgi?smart=321:SANT(13|64)+SANT(67|115)+
Os2R_MYB45	4530.OS04T0508500-01	Putative uncharacterized protein; Os04g0508500 protein	https://smart.embl.de/smart/DDvec.cgi?smart=281:SANT(24|74)+SANT(77|125)+
Os2R_MYB46	4530.OS02T0624300-01	Os02g0624300 protein; Putative myb protein; cDNA clone:001-110-C03, full insert sequence; Acts as negative regulator of cold tolerance. Negatively regulates beta-amylase genes at the transcriptional level in response to cold stress. Suppresses beta-amylase gene expression by interacting with TIFY11A/JAZ9. Maltose produced by beta-amylases has a role in protecting cell membranes under cold stress …	https://smart.embl.de/smart/DDvec.cgi?smart=258:SANT(13|63)+SANT(66|114)+
Os2R_MYB47	4530.OS04T0532800-01	OSJNBb0039L24.8 protein; Os04g0532800 protein; cDNA clone:002-124-C09, full insert sequence	https://smart.embl.de/smart/DDvec.cgi?smart=273:SANT(14|64)+SANT(67|115)+
Os2R_MYB48	4530.OS02T0641900-01	Putative P-type R2R3 Myb protein	https://smart.embl.de/smart/DDvec.cgi?smart=300:SANT(13|63)+SANT(66|114)+
Os2R_MYB49	4530.OS06T0679400-01	Os06g0679400 protein; Putative transcription factor GAMyb	https://smart.embl.de/smart/DDvec.cgi?smart=447:SANT(27|77)+SANT(80|128)+
Os2R_MYB5	4530.OS01T0285300-01	cDNA clone:J013087D08, full insert sequence; Os01g0285300 protein; Putative MYB2; Putative transcription factor (Myb); Uncharacterized protein; cDNA clone:J013087D08, full insert sequence	https://smart.embl.de/smart/DDvec.cgi?smart=428:SANT(13|63)+SANT(66|114)+
Os2R_MYB50	4530.OS04T0593200-01	OSJNBa0009P12.23 protein; cDNA, clone: J100049K04, full insert sequence	https://smart.embl.de/smart/DDvec.cgi?smart=340:SANT(14|66)+SANT(69|117)+
Os2R_MYB51	4530.OS04T0594100-01	OSJNBa0009P12.32 protein; Os04g0594100 protein	https://smart.embl.de/smart/DDvec.cgi?smart=371:SANT(15|65)+SANT(68|116)+
Os2R_MYB54	4530.OS09T0106700-01	Os09g0106700 protein; cDNA clone:J013055K23, full insert sequence	https://smart.embl.de/smart/DDvec.cgi?smart=319:SANT(16|65)+SANT(68|116)+
Os2R_MYB55	4530.OS05T0429900-01	cDNA clone:001-023-G03, full insert sequence; Myb transcription factor; Os05g0429900 protein; Putative myb protein; cDNA clone:001-023-G03, full insert sequence; cDNA clone:J013083O13, full insert sequence; cDNA clone:J023030O22, full insert sequence	https://smart.embl.de/smart/DDvec.cgi?smart=260:SANT(13|63)+SANT(66|114)+
Os2R_MYB56	4530.OS05T0442400-01	cDNA clone:002-124-C08, full insert sequence; Os05g0442400 protein; Putative myb-like transcription factor; cDNA clone:002-124-C08, full insert sequence	https://smart.embl.de/smart/DDvec.cgi?smart=182:SANT(24|76)+SANT(111|161)+
Os2R_MYB57	4530.OS05T0449900-01	cDNA clone:J013135D01, full insert sequence; Os05g0449900 protein; Putative uncharacterized protein B1122D01.8; cDNA clone:J013135D01, full insert sequence	https://smart.embl.de/smart/DDvec.cgi?smart=315:SANT(36|88)+SANT(149|199)+
Os2R_MYB58	4530.OS05T0490600-00	Os05g0490600 protein	https://smart.embl.de/smart/DDvec.cgi?smart=394:SANT(42|92)+SANT(95|143)+
Os2R_MYB59	4530.OS05T0543600-01	Os05g0543600 protein; Myb-related protein	https://smart.embl.de/smart/DDvec.cgi?smart=312:SANT(15|65)+SANT(68|116)+
Os2R_MYB6	4530.OS01T0298400-01	cDNA, clone: J065186D02, full insert sequence; Os01g0298400 protein; Putative typical P-type R2R3 Myb protein; Uncharacterized protein; cDNA, clone: J065186D02, full insert sequence	https://smart.embl.de/smart/DDvec.cgi?smart=293:SANT(22|72)+SANT(75|123)+
Os2R_MYB60	4530.OS05T0553400-01	Os05g0553400 protein; Putative Myb-related transcription factor; Putative myb transctiption factor	https://smart.embl.de/smart/DDvec.cgi?smart=289:SANT(13|64)+SANT(67|115)+
Os2R_MYB61	4530.OS03T0315400-01	Transcription factor myb2; Transcription factor involved in abiotic stress responses. Plays a regulatory role in tolerance to salt, cold, and drought stresses. Regulates positively the expression of genes involved in proline synthesis and transport, and genes involved in reactive oxygen species (ROS) scavenging such as peroxidase, superoxide dismutase and catalase during salt stress. Transactivat…	https://smart.embl.de/smart/DDvec.cgi?smart=329:SANT(21|71)+SANT(74|122)+
Os2R_MYB62	4530.OS06T0112700-00	Os06g0112700 protein	https://smart.embl.de/smart/DDvec.cgi?smart=367:SANT(14|64)+SANT(67|115)+
Os2R_MYB63	4530.OS01T0874300-01	cDNA clone:001-029-F12, full insert sequence; Os01g0874300 protein; Putative myb-related protein; Putative myb2; Uncharacterized protein; cDNA clone:001-029-F12, full insert sequence	https://smart.embl.de/smart/DDvec.cgi?smart=287:SANT(13|63)+SANT(66|114)+
Os2R_MYB64	4530.OS06T0221000-00	Os06g0221000 protein; Putative MYB family transcription factor	https://smart.embl.de/smart/DDvec.cgi?smart=322:SANT(13|63)+SANT(66|114)+
Os2R_MYB65	4530.OS06T0258500-00	Myb-like transcription factor-like	https://smart.embl.de/smart/DDvec.cgi?smart=142:SANT(34|87)+
Os2R_MYB66	4530.OS06T0605600-01	Os06g0605600 protein; Putative uncharacterized protein P0481H08.28	http://smart.embl.de/smart/DDt.cgi?smart=343:
Os2R_MYB68	4530.OS01T0855400-00	Myb protein; Myb proto-oncogene protein-like; Os01g0855400 protein; Uncharacterized protein	https://smart.embl.de/smart/DDvec.cgi?smart=448:SANT(115|164)+SANT(167|215)+
Os2R_MYB69	4530.OS07T0434300-00	Myb-like transcription factor-like	https://smart.embl.de/smart/DDvec.cgi?smart=198:SANT(26|75)+SANT(78|126)+
Os2R_MYB7	4530.OS01T0305900-01	Putative R2R3 Myb transcription factor MYB-IF35; Uncharacterized protein	https://smart.embl.de/smart/DDvec.cgi?smart=317:SANT(13|63)+SANT(66|114)+
Os2R_MYB70	4530.OS07T0497500-00	Os07g0497500 protein; Putative myb-related protein	https://smart.embl.de/smart/DDvec.cgi?smart=400:SANT(12|62)+SANT(65|113)+
Os2R_MYB71	4530.OS07T0558100-00	Myb protein; Os07g0558100 protein	https://smart.embl.de/smart/DDvec.cgi?smart=368:SANT(13|63)+SANT(66|114)+
Os2R_MYB72	4530.OS07T0629000-01	Os07g0629000 protein; Putative myb protein	https://smart.embl.de/smart/DDvec.cgi?smart=152:SANT(13|63)+SANT(66|114)+
Os2R_MYB73	4530.OS07T0688200-01	MYB transcription factor; Os07g0688200 protein; cDNA clone:J033129J22, full insert sequence	https://smart.embl.de/smart/DDvec.cgi?smart=300:SANT(20|70)+SANT(73|121)+
Os2R_MYB74	4530.OS08T0151300-01	Myb transcription factor (ATMYB4)-like protein; Os08g0151300 protein; cDNA clone:J013114D05, full insert sequence	https://smart.embl.de/smart/DDvec.cgi?smart=359:SANT(13|63)+SANT(66|114)+
Os2R_MYB77	4530.OS04T0461000-01	OSJNBa0072F16.11 protein; Os04g0461000 protein	https://smart.embl.de/smart/DDvec.cgi?smart=345:SANT(13|63)+SANT(66|114)+
Os2R_MYB79	4530.OS08T0450900-00	Putative myb-related protein	https://smart.embl.de/smart/DDvec.cgi?smart=200:SANT(13|62)+SANT(65|113)+
Os2R_MYB80	4530.OS08T0486300-00	annotation not available	https://smart.embl.de/smart/DDvec.cgi?smart=386:SANT(13|92)+SANT(95|143)+
Os2R_MYB82	4530.OS09T0401000-01	Os09g0401000 protein; Putative Myb51 protein	https://smart.embl.de/smart/DDvec.cgi?smart=279:SANT(13|63)+SANT(66|114)+
Os2R_MYB83	4530.OS08T0437300-00	Os08g0437200 protein; Putative typical P-type R2R3 Myb protein	https://smart.embl.de/smart/DDvec.cgi?smart=262:SANT(13|63)+SANT(66|114)+
Os2R_MYB84	4530.OS09T0431300-00	annotation not available	https://smart.embl.de/smart/DDvec.cgi?smart=445:SANT(48|132)+SANT(135|183)+
Os2R_MYB85	4530.OS09T0532900-04	cDNA clone:001-206-D11, full insert sequence; Os09g0532900 protein; Putative myb-related transcription factor; cDNA clone:001-206-D11, full insert sequence; cDNA clone:J023047I22, full insert sequence	https://smart.embl.de/smart/DDvec.cgi?smart=285:SANT(13|63)+SANT(66|114)+
Os2R_MYB86	4530.OS09T0538400-01	cDNA clone:006-202-H01, full insert sequence; MYB transcription factor; Os09g0538400 protein; Putative Myb-related protein Zm38; cDNA clone:006-202-H01, full insert sequence; cDNA clone:006-203-E04, full insert sequence; cDNA clone:006-301-B02, full insert sequence	https://smart.embl.de/smart/DDvec.cgi?smart=251:SANT(13|63)+SANT(66|114)+
Os2R_MYB87	4530.OS10T0478300-01	Myb factor; Myb-related protein Myb4, putative, expressed; Os10g0478300 protein; cDNA clone:002-153-H11, full insert sequence	https://smart.embl.de/smart/DDvec.cgi?smart=276:SANT(13|63)+SANT(66|114)+
Os2R_MYB88	4530.OS08T0248700-01	Os08g0248700 protein; Putative P-type R2R3 Myb protein; cDNA clone:J023093J22, full insert sequence	https://smart.embl.de/smart/DDvec.cgi?smart=316:SANT(13|64)+SANT(67|115)+
Os2R_MYB89	4530.OS11T0207600-00	Myb-like DNA-binding domain containing protein, expressed; Os11g0207600 protein	https://smart.embl.de/smart/DDvec.cgi?smart=267:SANT(25|74)+SANT(77|125)+
Os2R_MYB9	4530.OS01T0637800-00	Myb-related protein 340-like; Os01g0637800 protein	https://smart.embl.de/smart/DDvec.cgi?smart=278:SANT(65|115)+SANT(118|166)+
Os2R_MYB90	4530.OS11T0558200-01	Myb-like DNA-binding domain containing protein, expressed; Os11g0558200 protein; cDNA clone:002-172-B09, full insert sequence	https://smart.embl.de/smart/DDvec.cgi?smart=330:SANT(14|64)+SANT(67|115)+
Os2R_MYB92	4530.OS11T0700500-01	Myb-related protein MYBAS1; Transcription factor	https://smart.embl.de/smart/DDvec.cgi?smart=237:SANT(9|59)+SANT(62|110)+
Os2R_MYB93	4530.OS12T0125000-01	Myb-like DNA-binding domain containing protein, expressed; Os12g0125000 protein; cDNA clone:006-307-B04, full insert sequence	https://smart.embl.de/smart/DDvec.cgi?smart=311:SANT(13|63)+SANT(66|114)+
Os2R_MYB94	4530.OS11T0180900-00	Os11g0180900 protein	https://smart.embl.de/smart/DDvec.cgi?smart=295:SANT(13|63)+SANT(66|114)+
Os2R_MYB95	4530.OS12T0238000-00	Os12g0238000 protein; Myb-like DNA-binding domain containing protein, expressed; Os12g0238000 protein	https://smart.embl.de/smart/DDvec.cgi?smart=845:SANT(54|103)+SANT(106|155)+SANT(158|206)+COIL(729|753)+
Os2R_MYB96	4530.OS05T0140100-01	cDNA clone:J023018J24, full insert sequence; MYB transcription factor; MYB16 protein; Myb transcription factor; Os05g0140100 protein; Putative myb transcription factor; cDNA clone:J023018J24, full insert sequence	https://smart.embl.de/smart/DDvec.cgi?smart=427:SANT(13|63)+SANT(66|114)+
Os2R_MYB97	4530.OS11T0684000-01	Expressed protein; os11g0684000 protein; Probable transcription factor that may be involved in the jasmonate-dependent defense responses to the rice blast fungus Magnaporthe oryzae. Does not seem to function in the salicylic acid- dependent signaling pathway	https://smart.embl.de/smart/DDvec.cgi?smart=285:SANT(30|80)+SANT(83|131)+
Os2R_MYB98	4530.OS12T0567300-00	Myb-related protein MYBAS2; Transcription factor	https://smart.embl.de/smart/DDvec.cgi?smart=242:SANT(9|59)+SANT(62|110)+
Os2R_MYB99	4530.OS12T0613300-02	Myb-like DNA binding domain containing protein; Myb-like DNA-binding domain containing protein, expressed; Os12g0613300 protein; cDNA clone:J023108E10, full insert sequence	https://smart.embl.de/smart/DDvec.cgi?smart=297:SANT(4|59)+H15(116|181)+COIL(234|276)+
OsJ_06259	4530.OS02T0281000-01	Os02g0281000 protein; Putative PKG-Ib	https://smart.embl.de/smart/DDvec.cgi?smart=1086:PP2Cc(109|396)+cNMP(490|614)+cNMP(616|756)+Pfam_Pkinase_Tyr(790|1019)+
OsJ_07944	4530.OS02T0682500-01	Os02g0682500 protein; Putative anthocyanin biosynthetic gene regulator PAC1	https://smart.embl.de/smart/DDvec.cgi?smart=355:WD40(71|111)+WD40(132|172)+WD40(175|213)+WD40(264|304)+
OsJ_13160	4530.OS03T0822700-01	Armadillo/beta-catenin-like repeat family protein, expressed; cDNA clone:001-037-A06, full insert sequence	https://smart.embl.de/smart/DDvec.cgi?smart=379:Pfam_Fes1(10|97)+ARM(132|173)+ARM(175|215)+ARM(216|257)+
OsJ_15986	4530.OS04T0592700-01	OSJNBa0009P12.21 protein; Os04g0592700 protein; cDNA clone:J033052D05, full insert sequence	https://smart.embl.de/smart/DDvec.cgi?smart=891:WD40(66|105)+WD40(108|147)+WD40(150|191)+WD40(194|233)+WD40(236|292)+WD40(355|395)+WD40(398|440)+WD40(443|483)+WD40(496|535)+WD40(538|577)+WD40(580|619)+WD40(622|661)+Pfam_Utp13(682|816)+
OsJ_19547	4530.OS05T0563000-01	cDNA clone:J023145A15, full insert sequence; Os05g0563000 protein; Putative uncharacterized protein OSJNBb0053D02.2; cDNA clone:J023145A15, full insert sequence	https://smart.embl.de/smart/DDvec.cgi?smart=314:Pfam_NAM(66|206)+
P0541C02.2	4530.OS06T0716700-02	90 kDa heat shock protein; Heat shock protein 90	https://smart.embl.de/smart/DDvec.cgi?smart=812:SIGNAL(1|21)+HATPase_c(101|258)+Pfam_HSP90(260|800)+
PPS	4530.OS02T0771100-01	cDNA clone:J013104O14, full insert sequence; Putative COP1, constitutive photomorphogenesis 1	https://smart.embl.de/smart/DDvec.cgi?smart=685:RING(60|97)+WD40(365|409)+WD40(420|459)+WD40(462|502)+WD40(503|544)+WD40(548|586)+WD40(589|628)+WD40(638|682)+
TDL1A	4530.OS12T0472500-01	Expressed protein; os12g0472500 protein; cdna clone:002-144-b06, full insert sequence; Involved in cell specification during anther development. Required for the differentiation of primary parietal cells into secondary parietal cells in anthers . May serve as an extracellular ligand for the MSP1 receptor kinase to limit sporocyte number in ovules	https://smart.embl.de/smart/DDvec.cgi?smart=226:SIGNAL(1|35)+
