# Supplementary material for: Genome-Wide Identification of R2R3-MYB Transcription Factor and Expression Analysis under Abiotic Stress in Rice
Source: Plants (Basel). 2022 Jul 25;11(15):1928. doi: 10.3390/plants11151928 (PMC9330779; doi:10.3390/plants11151928)
Supplement: Supplementary file 1 [file plants-11-01928-s001.zip › Table S5 R2R3_MYB proteins interaction network functional annotations.xlsx]

## Sheet: string_functional_annotations (
#node	identifier	category	term ID	term description
CESA7	4530.OS10T0467800-01	GO Process	GO:0000271	Polysaccharide biosynthetic process
CESA7	4530.OS10T0467800-01	GO Process	GO:0000278	Mitotic cell cycle
CESA7	4530.OS10T0467800-01	GO Process	GO:0000281	Mitotic cytokinesis
CESA7	4530.OS10T0467800-01	GO Process	GO:0000910	Cytokinesis
CESA7	4530.OS10T0467800-01	GO Process	GO:0005975	Carbohydrate metabolic process
CESA7	4530.OS10T0467800-01	GO Process	GO:0005976	Polysaccharide metabolic process
CESA7	4530.OS10T0467800-01	GO Process	GO:0006073	Cellular glucan metabolic process
CESA7	4530.OS10T0467800-01	GO Process	GO:0007049	Cell cycle
CESA7	4530.OS10T0467800-01	GO Process	GO:0008152	Metabolic process
CESA7	4530.OS10T0467800-01	GO Process	GO:0009058	Biosynthetic process
CESA7	4530.OS10T0467800-01	GO Process	GO:0009059	Macromolecule biosynthetic process
CESA7	4530.OS10T0467800-01	GO Process	GO:0009250	Glucan biosynthetic process
CESA7	4530.OS10T0467800-01	GO Process	GO:0009832	Plant-type cell wall biogenesis
CESA7	4530.OS10T0467800-01	GO Process	GO:0009833	Plant-type primary cell wall biogenesis
CESA7	4530.OS10T0467800-01	GO Process	GO:0009834	Plant-type secondary cell wall biogenesis
CESA7	4530.OS10T0467800-01	GO Process	GO:0009987	Cellular process
CESA7	4530.OS10T0467800-01	GO Process	GO:0016043	Cellular component organization
CESA7	4530.OS10T0467800-01	GO Process	GO:0016051	Carbohydrate biosynthetic process
CESA7	4530.OS10T0467800-01	GO Process	GO:0022402	Cell cycle process
CESA7	4530.OS10T0467800-01	GO Process	GO:0030243	Cellulose metabolic process
CESA7	4530.OS10T0467800-01	GO Process	GO:0030244	Cellulose biosynthetic process
CESA7	4530.OS10T0467800-01	GO Process	GO:0033692	Cellular polysaccharide biosynthetic process
CESA7	4530.OS10T0467800-01	GO Process	GO:0034637	Cellular carbohydrate biosynthetic process
CESA7	4530.OS10T0467800-01	GO Process	GO:0034645	Cellular macromolecule biosynthetic process
CESA7	4530.OS10T0467800-01	GO Process	GO:0042546	Cell wall biogenesis
CESA7	4530.OS10T0467800-01	GO Process	GO:0043170	Macromolecule metabolic process
CESA7	4530.OS10T0467800-01	GO Process	GO:0044042	Glucan metabolic process
CESA7	4530.OS10T0467800-01	GO Process	GO:0044085	Cellular component biogenesis
CESA7	4530.OS10T0467800-01	GO Process	GO:0044237	Cellular metabolic process
CESA7	4530.OS10T0467800-01	GO Process	GO:0044238	Primary metabolic process
CESA7	4530.OS10T0467800-01	GO Process	GO:0044249	Cellular biosynthetic process
CESA7	4530.OS10T0467800-01	GO Process	GO:0044260	Cellular macromolecule metabolic process
CESA7	4530.OS10T0467800-01	GO Process	GO:0044262	Cellular carbohydrate metabolic process
CESA7	4530.OS10T0467800-01	GO Process	GO:0044264	Cellular polysaccharide metabolic process
CESA7	4530.OS10T0467800-01	GO Process	GO:0045229	External encapsulating structure organization
CESA7	4530.OS10T0467800-01	GO Process	GO:0051273	Beta-glucan metabolic process
CESA7	4530.OS10T0467800-01	GO Process	GO:0051274	Beta-glucan biosynthetic process
CESA7	4530.OS10T0467800-01	GO Process	GO:0051301	Cell division
CESA7	4530.OS10T0467800-01	GO Process	GO:0061640	Cytoskeleton-dependent cytokinesis
CESA7	4530.OS10T0467800-01	GO Process	GO:0071554	Cell wall organization or biogenesis
CESA7	4530.OS10T0467800-01	GO Process	GO:0071555	Cell wall organization
CESA7	4530.OS10T0467800-01	GO Process	GO:0071669	Plant-type cell wall organization or biogenesis
CESA7	4530.OS10T0467800-01	GO Process	GO:0071704	Organic substance metabolic process
CESA7	4530.OS10T0467800-01	GO Process	GO:0071840	Cellular component organization or biogenesis
CESA7	4530.OS10T0467800-01	GO Process	GO:1901576	Organic substance biosynthetic process
CESA7	4530.OS10T0467800-01	GO Process	GO:1903047	Mitotic cell cycle process
CESA7	4530.OS10T0467800-01	GO Function	GO:0003824	Catalytic activity
CESA7	4530.OS10T0467800-01	GO Function	GO:0005488	Binding
CESA7	4530.OS10T0467800-01	GO Function	GO:0008194	UDP-glycosyltransferase activity
CESA7	4530.OS10T0467800-01	GO Function	GO:0016740	Transferase activity
CESA7	4530.OS10T0467800-01	GO Function	GO:0016757	Transferase activity, transferring glycosyl groups
CESA7	4530.OS10T0467800-01	GO Function	GO:0016758	Transferase activity, transferring hexosyl groups
CESA7	4530.OS10T0467800-01	GO Function	GO:0016759	Cellulose synthase activity
CESA7	4530.OS10T0467800-01	GO Function	GO:0016760	Cellulose synthase (udp-forming) activity
CESA7	4530.OS10T0467800-01	GO Function	GO:0035251	UDP-glucosyltransferase activity
CESA7	4530.OS10T0467800-01	GO Function	GO:0043167	Ion binding
CESA7	4530.OS10T0467800-01	GO Function	GO:0043169	Cation binding
CESA7	4530.OS10T0467800-01	GO Function	GO:0046527	Glucosyltransferase activity
CESA7	4530.OS10T0467800-01	GO Function	GO:0046872	Metal ion binding
CESA7	4530.OS10T0467800-01	GO Component	GO:0005622	Intracellular
CESA7	4530.OS10T0467800-01	GO Component	GO:0005737	Cytoplasm
CESA7	4530.OS10T0467800-01	GO Component	GO:0005794	Golgi apparatus
CESA7	4530.OS10T0467800-01	GO Component	GO:0005802	trans-Golgi network
CESA7	4530.OS10T0467800-01	GO Component	GO:0005886	Plasma membrane
CESA7	4530.OS10T0467800-01	GO Component	GO:0012505	Endomembrane system
CESA7	4530.OS10T0467800-01	GO Component	GO:0016020	Membrane
CESA7	4530.OS10T0467800-01	GO Component	GO:0016021	Integral component of membrane
CESA7	4530.OS10T0467800-01	GO Component	GO:0031224	Intrinsic component of membrane
CESA7	4530.OS10T0467800-01	GO Component	GO:0031984	Organelle subcompartment
CESA7	4530.OS10T0467800-01	GO Component	GO:0043226	Organelle
CESA7	4530.OS10T0467800-01	GO Component	GO:0043227	Membrane-bounded organelle
CESA7	4530.OS10T0467800-01	GO Component	GO:0043229	Intracellular organelle
CESA7	4530.OS10T0467800-01	GO Component	GO:0043231	Intracellular membrane-bounded organelle
CESA7	4530.OS10T0467800-01	GO Component	GO:0071944	Cell periphery
CESA7	4530.OS10T0467800-01	GO Component	GO:0098791	Golgi apparatus subcompartment
CESA7	4530.OS10T0467800-01	GO Component	GO:0110165	Cellular anatomical entity
CESA7	4530.OS10T0467800-01	STRING clusters	CL:37920	Mostly uncharacterized, incl. cellulose biosynthetic process, and fasciclin domain
CESA7	4530.OS10T0467800-01	STRING clusters	CL:37921	Mostly uncharacterized, incl. cellulose biosynthetic process, and fasciclin domain
CESA7	4530.OS10T0467800-01	STRING clusters	CL:37923	Mostly uncharacterized, incl. cellulose biosynthetic process, and fasciclin domain
CESA7	4530.OS10T0467800-01	STRING clusters	CL:37925	Mostly uncharacterized, incl. cellulose biosynthetic process, and fasciclin domain
CESA7	4530.OS10T0467800-01	STRING clusters	CL:37926	Mostly uncharacterized, incl. cellulose biosynthetic process, and fasciclin domain
CESA7	4530.OS10T0467800-01	STRING clusters	CL:37927	Mostly uncharacterized, incl. cellulose biosynthetic process, and fasciclin domain
CESA7	4530.OS10T0467800-01	STRING clusters	CL:37929	Mostly uncharacterized, incl. cellulose biosynthetic process, and fasciclin domain
CESA7	4530.OS10T0467800-01	STRING clusters	CL:37930	Mostly uncharacterized, incl. cellulose biosynthetic process, and fasciclin domain
CESA7	4530.OS10T0467800-01	STRING clusters	CL:37932	Mostly uncharacterized, incl. cellulose biosynthetic process, and fasciclin domain
CESA7	4530.OS10T0467800-01	STRING clusters	CL:37933	Mostly uncharacterized, incl. cellulose biosynthetic process, and fasciclin domain
CESA7	4530.OS10T0467800-01	STRING clusters	CL:37935	Mostly uncharacterized, incl. cellulose biosynthetic process, and fasciclin domain
CESA7	4530.OS10T0467800-01	STRING clusters	CL:37937	Mostly uncharacterized, incl. cellulose biosynthetic process, and fasciclin domain
CESA7	4530.OS10T0467800-01	STRING clusters	CL:37939	Mostly uncharacterized, incl. cellulose biosynthetic process, and fasciclin domain
CESA7	4530.OS10T0467800-01	STRING clusters	CL:37940	Mixed, incl. cellulose biosynthetic process, and fasciclin domain
CESA7	4530.OS10T0467800-01	STRING clusters	CL:37941	Mixed, incl. cellulose biosynthetic process, and fasciclin domain
CESA7	4530.OS10T0467800-01	STRING clusters	CL:37943	Mixed, incl. cellulose biosynthetic process, and fasciclin domain
CESA7	4530.OS10T0467800-01	STRING clusters	CL:37945	Mixed, incl. cellulose biosynthetic process, and fasciclin domain
CESA7	4530.OS10T0467800-01	STRING clusters	CL:38053	Mixed, incl. cellulose biosynthesis, and cell wall beta-glucan biosynthetic process
CESA7	4530.OS10T0467800-01	STRING clusters	CL:38055	Mixed, incl. cellulose biosynthesis, and rab6-interacting golgin
CESA7	4530.OS10T0467800-01	STRING clusters	CL:38057	Cellulose biosynthesis, and cell wall beta-glucan biosynthetic process
CESA7	4530.OS10T0467800-01	COMPARTMENTS	GOCC:0010330	Cellulose synthase complex
CESA7	4530.OS10T0467800-01	COMPARTMENTS	GOCC:0030424	Axon
CESA7	4530.OS10T0467800-01	COMPARTMENTS	GOCC:0032991	Protein-containing complex
CESA7	4530.OS10T0467800-01	COMPARTMENTS	GOCC:0033269	Internode region of axon
CESA7	4530.OS10T0467800-01	COMPARTMENTS	GOCC:0042995	Cell projection
CESA7	4530.OS10T0467800-01	COMPARTMENTS	GOCC:0043005	Neuron projection
CESA7	4530.OS10T0467800-01	COMPARTMENTS	GOCC:0044304	Main axon
CESA7	4530.OS10T0467800-01	COMPARTMENTS	GOCC:0044568	Secondary cell wall cellulose synthase complex
CESA7	4530.OS10T0467800-01	COMPARTMENTS	GOCC:0110165	Cellular anatomical entity
CESA7	4530.OS10T0467800-01	COMPARTMENTS	GOCC:0120025	Plasma membrane bounded cell projection
CESA7	4530.OS10T0467800-01	COMPARTMENTS	GOCC:1902494	Catalytic complex
CESA7	4530.OS10T0467800-01	COMPARTMENTS	GOCC:1990234	Transferase complex
CESA7	4530.OS10T0467800-01	UniProt Keywords	KW-0135	Cellulose biosynthesis
CESA7	4530.OS10T0467800-01	UniProt Keywords	KW-0175	Coiled coil
CESA7	4530.OS10T0467800-01	UniProt Keywords	KW-0325	Glycoprotein
CESA7	4530.OS10T0467800-01	UniProt Keywords	KW-0328	Glycosyltransferase
CESA7	4530.OS10T0467800-01	UniProt Keywords	KW-0472	Membrane
CESA7	4530.OS10T0467800-01	UniProt Keywords	KW-0479	Metal-binding
CESA7	4530.OS10T0467800-01	UniProt Keywords	KW-0808	Transferase
CESA7	4530.OS10T0467800-01	UniProt Keywords	KW-0812	Transmembrane
CESA7	4530.OS10T0467800-01	UniProt Keywords	KW-0862	Zinc
CESA7	4530.OS10T0467800-01	UniProt Keywords	KW-0863	Zinc-finger
CESA7	4530.OS10T0467800-01	UniProt Keywords	KW-0961	Cell wall biogenesis/degradation
CESA7	4530.OS10T0467800-01	UniProt Keywords	KW-1003	Cell membrane
CESA7	4530.OS10T0467800-01	UniProt Keywords	KW-1133	Transmembrane helix
CESA7	4530.OS10T0467800-01	Pfam	PF03552	Cellulose synthase
CESA7	4530.OS10T0467800-01	Pfam	PF13632	Glycosyl transferase family group 2
CESA7	4530.OS10T0467800-01	Pfam	PF14569	Zinc-binding RING-finger
CESA7	4530.OS10T0467800-01	InterPro	IPR001841	Zinc finger, RING-type
CESA7	4530.OS10T0467800-01	InterPro	IPR005150	Cellulose synthase
CESA7	4530.OS10T0467800-01	InterPro	IPR013083	Zinc finger, RING/FYVE/PHD-type
CESA7	4530.OS10T0467800-01	InterPro	IPR027934	Cellulose synthase, RING-type zinc finger
CESA7	4530.OS10T0467800-01	InterPro	IPR029044	Nucleotide-diphospho-sugar transferases
CESA7	4530.OS10T0467800-01	SMART	SM00184	Ring finger
CYCB2-2	4530.OS06T0726800-01	GO Process	GO:0000079	Regulation of cyclin-dependent protein serine/threonine kinase activity
CYCB2-2	4530.OS06T0726800-01	GO Process	GO:0000278	Mitotic cell cycle
CYCB2-2	4530.OS06T0726800-01	GO Process	GO:0001932	Regulation of protein phosphorylation
CYCB2-2	4530.OS06T0726800-01	GO Process	GO:0007049	Cell cycle
CYCB2-2	4530.OS06T0726800-01	GO Process	GO:0009987	Cellular process
CYCB2-2	4530.OS06T0726800-01	GO Process	GO:0019220	Regulation of phosphate metabolic process
CYCB2-2	4530.OS06T0726800-01	GO Process	GO:0019222	Regulation of metabolic process
CYCB2-2	4530.OS06T0726800-01	GO Process	GO:0022402	Cell cycle process
CYCB2-2	4530.OS06T0726800-01	GO Process	GO:0031323	Regulation of cellular metabolic process
CYCB2-2	4530.OS06T0726800-01	GO Process	GO:0031399	Regulation of protein modification process
CYCB2-2	4530.OS06T0726800-01	GO Process	GO:0032268	Regulation of cellular protein metabolic process
CYCB2-2	4530.OS06T0726800-01	GO Process	GO:0042325	Regulation of phosphorylation
CYCB2-2	4530.OS06T0726800-01	GO Process	GO:0043549	Regulation of kinase activity
CYCB2-2	4530.OS06T0726800-01	GO Process	GO:0044770	Cell cycle phase transition
CYCB2-2	4530.OS06T0726800-01	GO Process	GO:0044772	Mitotic cell cycle phase transition
CYCB2-2	4530.OS06T0726800-01	GO Process	GO:0045859	Regulation of protein kinase activity
CYCB2-2	4530.OS06T0726800-01	GO Process	GO:0050789	Regulation of biological process
CYCB2-2	4530.OS06T0726800-01	GO Process	GO:0050790	Regulation of catalytic activity
CYCB2-2	4530.OS06T0726800-01	GO Process	GO:0050794	Regulation of cellular process
CYCB2-2	4530.OS06T0726800-01	GO Process	GO:0051171	Regulation of nitrogen compound metabolic process
CYCB2-2	4530.OS06T0726800-01	GO Process	GO:0051174	Regulation of phosphorus metabolic process
CYCB2-2	4530.OS06T0726800-01	GO Process	GO:0051246	Regulation of protein metabolic process
CYCB2-2	4530.OS06T0726800-01	GO Process	GO:0051301	Cell division
CYCB2-2	4530.OS06T0726800-01	GO Process	GO:0051338	Regulation of transferase activity
CYCB2-2	4530.OS06T0726800-01	GO Process	GO:0051726	Regulation of cell cycle
CYCB2-2	4530.OS06T0726800-01	GO Process	GO:0060255	Regulation of macromolecule metabolic process
CYCB2-2	4530.OS06T0726800-01	GO Process	GO:0065007	Biological regulation
CYCB2-2	4530.OS06T0726800-01	GO Process	GO:0065009	Regulation of molecular function
CYCB2-2	4530.OS06T0726800-01	GO Process	GO:0071900	Regulation of protein serine/threonine kinase activity
CYCB2-2	4530.OS06T0726800-01	GO Process	GO:0080090	Regulation of primary metabolic process
CYCB2-2	4530.OS06T0726800-01	GO Process	GO:1903047	Mitotic cell cycle process
CYCB2-2	4530.OS06T0726800-01	GO Process	GO:1904029	Regulation of cyclin-dependent protein kinase activity
CYCB2-2	4530.OS06T0726800-01	GO Function	GO:0016538	Cyclin-dependent protein serine/threonine kinase regulator activity
CYCB2-2	4530.OS06T0726800-01	GO Function	GO:0019207	Kinase regulator activity
CYCB2-2	4530.OS06T0726800-01	GO Function	GO:0019887	Protein kinase regulator activity
CYCB2-2	4530.OS06T0726800-01	GO Function	GO:0030234	Enzyme regulator activity
CYCB2-2	4530.OS06T0726800-01	GO Function	GO:0098772	Molecular function regulator
CYCB2-2	4530.OS06T0726800-01	GO Component	GO:0000307	Cyclin-dependent protein kinase holoenzyme complex
CYCB2-2	4530.OS06T0726800-01	GO Component	GO:0005622	Intracellular
CYCB2-2	4530.OS06T0726800-01	GO Component	GO:0005634	Nucleus
CYCB2-2	4530.OS06T0726800-01	GO Component	GO:0005737	Cytoplasm
CYCB2-2	4530.OS06T0726800-01	GO Component	GO:0018995	Host cellular component
CYCB2-2	4530.OS06T0726800-01	GO Component	GO:0032991	Protein-containing complex
CYCB2-2	4530.OS06T0726800-01	GO Component	GO:0033643	Host cell part
CYCB2-2	4530.OS06T0726800-01	GO Component	GO:0033646	Host intracellular part
CYCB2-2	4530.OS06T0726800-01	GO Component	GO:0033647	Host intracellular organelle
CYCB2-2	4530.OS06T0726800-01	GO Component	GO:0033648	Host intracellular membrane-bounded organelle
CYCB2-2	4530.OS06T0726800-01	GO Component	GO:0042025	Host cell nucleus
CYCB2-2	4530.OS06T0726800-01	GO Component	GO:0043226	Organelle
CYCB2-2	4530.OS06T0726800-01	GO Component	GO:0043227	Membrane-bounded organelle
CYCB2-2	4530.OS06T0726800-01	GO Component	GO:0043229	Intracellular organelle
CYCB2-2	4530.OS06T0726800-01	GO Component	GO:0043231	Intracellular membrane-bounded organelle
CYCB2-2	4530.OS06T0726800-01	GO Component	GO:0043656	Host intracellular region
CYCB2-2	4530.OS06T0726800-01	GO Component	GO:0043657	Host cell
CYCB2-2	4530.OS06T0726800-01	GO Component	GO:0061695	Transferase complex, transferring phosphorus-containing groups
CYCB2-2	4530.OS06T0726800-01	GO Component	GO:0110165	Cellular anatomical entity
CYCB2-2	4530.OS06T0726800-01	GO Component	GO:1902494	Catalytic complex
CYCB2-2	4530.OS06T0726800-01	GO Component	GO:1902554	Serine/threonine protein kinase complex
CYCB2-2	4530.OS06T0726800-01	GO Component	GO:1902911	Protein kinase complex
CYCB2-2	4530.OS06T0726800-01	GO Component	GO:1990234	Transferase complex
CYCB2-2	4530.OS06T0726800-01	STRING clusters	CL:14121	Mixed, incl. mitotic cell cycle phase transition, and microtubule motor activity
CYCB2-2	4530.OS06T0726800-01	STRING clusters	CL:14299	Cyclin, and E2F/DP family winged-helix DNA-binding domain
CYCB2-2	4530.OS06T0726800-01	STRING clusters	CL:14300	Cyclin, and cell cycle G1/S phase transition
CYCB2-2	4530.OS06T0726800-01	STRING clusters	CL:14303	Cyclin, and cell cycle G1/S phase transition
CYCB2-2	4530.OS06T0726800-01	STRING clusters	CL:14306	Cyclin, and cell cycle G1/S phase transition
CYCB2-2	4530.OS06T0726800-01	STRING clusters	CL:14308	Cyclin, C-terminal domain, and cell cycle G1/S phase transition
CYCB2-2	4530.OS06T0726800-01	STRING clusters	CL:14310	Cyclin, and cell cycle G1/S phase transition
CYCB2-2	4530.OS06T0726800-01	STRING clusters	CL:14312	Cyclin, and cyclin binding
CYCB2-2	4530.OS06T0726800-01	STRING clusters	CL:14316	Cyclin binding, and mitosis
CYCB2-2	4530.OS06T0726800-01	UniProt Keywords	KW-0131	Cell cycle
CYCB2-2	4530.OS06T0726800-01	UniProt Keywords	KW-0132	Cell division
CYCB2-2	4530.OS06T0726800-01	UniProt Keywords	KW-0195	Cyclin
CYCB2-2	4530.OS06T0726800-01	UniProt Keywords	KW-0498	Mitosis
CYCB2-2	4530.OS06T0726800-01	UniProt Keywords	KW-0539	Nucleus
CYCB2-2	4530.OS06T0726800-01	Pfam	PF00134	Cyclin, N-terminal domain
CYCB2-2	4530.OS06T0726800-01	Pfam	PF02984	Cyclin, C-terminal domain
CYCB2-2	4530.OS06T0726800-01	InterPro	IPR004367	Cyclin, C-terminal domain
CYCB2-2	4530.OS06T0726800-01	InterPro	IPR006671	Cyclin, N-terminal
CYCB2-2	4530.OS06T0726800-01	InterPro	IPR013763	Cyclin-like
CYCB2-2	4530.OS06T0726800-01	InterPro	IPR036915	Cyclin-like superfamily
CYCB2-2	4530.OS06T0726800-01	InterPro	IPR039361	Cyclin
CYCB2-2	4530.OS06T0726800-01	SMART	SM00385	Domain present in cyclins, tfiib and retinoblastoma
CYCB2-2	4530.OS06T0726800-01	SMART	SM01332	Cyclins are a family of proteins that control the progression of cells through the cell cycle by activating cyclin-dependent kinase (Cdk) enzymes.
HOS66	4530.OS03T0123500-02	GO Process	GO:0006355	Regulation of transcription, dna-templated
HOS66	4530.OS03T0123500-02	GO Process	GO:0006357	Regulation of transcription by rna polymerase ii
HOS66	4530.OS03T0123500-02	GO Process	GO:0008152	Metabolic process
HOS66	4530.OS03T0123500-02	GO Process	GO:0009058	Biosynthetic process
HOS66	4530.OS03T0123500-02	GO Process	GO:0009888	Tissue development
HOS66	4530.OS03T0123500-02	GO Process	GO:0009889	Regulation of biosynthetic process
HOS66	4530.OS03T0123500-02	GO Process	GO:0009890	Negative regulation of biosynthetic process
HOS66	4530.OS03T0123500-02	GO Process	GO:0009892	Negative regulation of metabolic process
HOS66	4530.OS03T0123500-02	GO Process	GO:0009987	Cellular process
HOS66	4530.OS03T0123500-02	GO Process	GO:0010087	Phloem or xylem histogenesis
HOS66	4530.OS03T0123500-02	GO Process	GO:0010089	Xylem development
HOS66	4530.OS03T0123500-02	GO Process	GO:0010191	Mucilage metabolic process
HOS66	4530.OS03T0123500-02	GO Process	GO:0010192	Mucilage biosynthetic process
HOS66	4530.OS03T0123500-02	GO Process	GO:0010468	Regulation of gene expression
HOS66	4530.OS03T0123500-02	GO Process	GO:0010556	Regulation of macromolecule biosynthetic process
HOS66	4530.OS03T0123500-02	GO Process	GO:0010558	Negative regulation of macromolecule biosynthetic process
HOS66	4530.OS03T0123500-02	GO Process	GO:0010605	Negative regulation of macromolecule metabolic process
HOS66	4530.OS03T0123500-02	GO Process	GO:0010629	Negative regulation of gene expression
HOS66	4530.OS03T0123500-02	GO Process	GO:0019219	Regulation of nucleobase-containing compound metabolic process
HOS66	4530.OS03T0123500-02	GO Process	GO:0019222	Regulation of metabolic process
HOS66	4530.OS03T0123500-02	GO Process	GO:0031323	Regulation of cellular metabolic process
HOS66	4530.OS03T0123500-02	GO Process	GO:0031324	Negative regulation of cellular metabolic process
HOS66	4530.OS03T0123500-02	GO Process	GO:0031326	Regulation of cellular biosynthetic process
HOS66	4530.OS03T0123500-02	GO Process	GO:0031327	Negative regulation of cellular biosynthetic process
HOS66	4530.OS03T0123500-02	GO Process	GO:0032502	Developmental process
HOS66	4530.OS03T0123500-02	GO Process	GO:0044087	Regulation of cellular component biogenesis
HOS66	4530.OS03T0123500-02	GO Process	GO:0044237	Cellular metabolic process
HOS66	4530.OS03T0123500-02	GO Process	GO:0044249	Cellular biosynthetic process
HOS66	4530.OS03T0123500-02	GO Process	GO:0045892	Negative regulation of transcription, dna-templated
HOS66	4530.OS03T0123500-02	GO Process	GO:0045934	Negative regulation of nucleobase-containing compound metabolic process
HOS66	4530.OS03T0123500-02	GO Process	GO:0048519	Negative regulation of biological process
HOS66	4530.OS03T0123500-02	GO Process	GO:0048523	Negative regulation of cellular process
HOS66	4530.OS03T0123500-02	GO Process	GO:0048856	Anatomical structure development
HOS66	4530.OS03T0123500-02	GO Process	GO:0050789	Regulation of biological process
HOS66	4530.OS03T0123500-02	GO Process	GO:0050794	Regulation of cellular process
HOS66	4530.OS03T0123500-02	GO Process	GO:0051171	Regulation of nitrogen compound metabolic process
HOS66	4530.OS03T0123500-02	GO Process	GO:0051172	Negative regulation of nitrogen compound metabolic process
HOS66	4530.OS03T0123500-02	GO Process	GO:0051252	Regulation of rna metabolic process
HOS66	4530.OS03T0123500-02	GO Process	GO:0051253	Negative regulation of rna metabolic process
HOS66	4530.OS03T0123500-02	GO Process	GO:0060255	Regulation of macromolecule metabolic process
HOS66	4530.OS03T0123500-02	GO Process	GO:0065007	Biological regulation
HOS66	4530.OS03T0123500-02	GO Process	GO:0065009	Regulation of molecular function
HOS66	4530.OS03T0123500-02	GO Process	GO:0080090	Regulation of primary metabolic process
HOS66	4530.OS03T0123500-02	GO Process	GO:1902679	Negative regulation of rna biosynthetic process
HOS66	4530.OS03T0123500-02	GO Process	GO:1903338	Regulation of cell wall organization or biogenesis
HOS66	4530.OS03T0123500-02	GO Process	GO:1903506	Regulation of nucleic acid-templated transcription
HOS66	4530.OS03T0123500-02	GO Process	GO:1903507	Negative regulation of nucleic acid-templated transcription
HOS66	4530.OS03T0123500-02	GO Process	GO:2000112	Regulation of cellular macromolecule biosynthetic process
HOS66	4530.OS03T0123500-02	GO Process	GO:2000113	Negative regulation of cellular macromolecule biosynthetic process
HOS66	4530.OS03T0123500-02	GO Process	GO:2000652	Regulation of secondary cell wall biogenesis
HOS66	4530.OS03T0123500-02	GO Process	GO:2001141	Regulation of rna biosynthetic process
HOS66	4530.OS03T0123500-02	GO Function	GO:0000976	Transcription regulatory region sequence-specific dna binding
HOS66	4530.OS03T0123500-02	GO Function	GO:0000977	RNA polymerase II transcription regulatory region sequence-specific DNA binding
HOS66	4530.OS03T0123500-02	GO Function	GO:0000978	RNA polymerase II cis-regulatory region sequence-specific DNA binding
HOS66	4530.OS03T0123500-02	GO Function	GO:0000981	DNA-binding transcription factor activity, RNA polymerase II-specific
HOS66	4530.OS03T0123500-02	GO Function	GO:0000987	Cis-regulatory region sequence-specific dna binding
HOS66	4530.OS03T0123500-02	GO Function	GO:0001067	Regulatory region nucleic acid binding
HOS66	4530.OS03T0123500-02	GO Function	GO:0003676	Nucleic acid binding
HOS66	4530.OS03T0123500-02	GO Function	GO:0003677	DNA binding
HOS66	4530.OS03T0123500-02	GO Function	GO:0003690	Double-stranded dna binding
HOS66	4530.OS03T0123500-02	GO Function	GO:0003700	DNA-binding transcription factor activity
HOS66	4530.OS03T0123500-02	GO Function	GO:0005488	Binding
HOS66	4530.OS03T0123500-02	GO Function	GO:0043565	Sequence-specific dna binding
HOS66	4530.OS03T0123500-02	GO Function	GO:0097159	Organic cyclic compound binding
HOS66	4530.OS03T0123500-02	GO Function	GO:0098772	Molecular function regulator
HOS66	4530.OS03T0123500-02	GO Function	GO:0140110	Transcription regulator activity
HOS66	4530.OS03T0123500-02	GO Function	GO:1901363	Heterocyclic compound binding
HOS66	4530.OS03T0123500-02	GO Function	GO:1990837	Sequence-specific double-stranded dna binding
HOS66	4530.OS03T0123500-02	GO Component	GO:0005622	Intracellular
HOS66	4530.OS03T0123500-02	GO Component	GO:0005634	Nucleus
HOS66	4530.OS03T0123500-02	GO Component	GO:0043226	Organelle
HOS66	4530.OS03T0123500-02	GO Component	GO:0043227	Membrane-bounded organelle
HOS66	4530.OS03T0123500-02	GO Component	GO:0043229	Intracellular organelle
HOS66	4530.OS03T0123500-02	GO Component	GO:0043231	Intracellular membrane-bounded organelle
HOS66	4530.OS03T0123500-02	GO Component	GO:0110165	Cellular anatomical entity
HOS66	4530.OS03T0123500-02	STRING clusters	CL:35026	Mixed, incl. homeobox, and ovate protein family
HOS66	4530.OS03T0123500-02	STRING clusters	CL:35028	Mixed, incl. homeobox, and ovate protein family
HOS66	4530.OS03T0123500-02	STRING clusters	CL:35029	Mixed, incl. homeobox, and ovate protein family
HOS66	4530.OS03T0123500-02	STRING clusters	CL:35030	Mixed, incl. homeobox, and abaxial cell fate specification
HOS66	4530.OS03T0123500-02	STRING clusters	CL:35031	Homeobox, and abaxial cell fate specification
HOS66	4530.OS03T0123500-02	STRING clusters	CL:35032	Mixed, incl. homeobox kn domain, and abaxial cell fate specification
HOS66	4530.OS03T0123500-02	STRING clusters	CL:35033	Mixed, incl. homeobox kn domain, and abaxial cell fate specification
HOS66	4530.OS03T0123500-02	STRING clusters	CL:35034	Mixed, incl. this domain is required for the nuclear localisation of these proteins pubmed:11352458. all of these proteins are members of the tale/knox homeodomain family, a subfamily within homeobox sm00389., and domain associated with hox domains
HOS66	4530.OS03T0123500-02	STRING clusters	CL:35036	This domain is required for the nuclear localisation of these proteins PUBMED:11352458. All of these proteins are members of the Tale/Knox homeodomain family, a subfamily within homeobox SM00389., and domain associated with HOX domains
HOS66	4530.OS03T0123500-02	STRING clusters	CL:35038	This domain is required for the nuclear localisation of these proteins PUBMED:11352458. All of these proteins are members of the Tale/Knox homeodomain family, a subfamily within homeobox SM00389., and DNA-binding domain
HOS66	4530.OS03T0123500-02	COMPARTMENTS	GOCC:0005622	Intracellular
HOS66	4530.OS03T0123500-02	COMPARTMENTS	GOCC:0005634	Nucleus
HOS66	4530.OS03T0123500-02	COMPARTMENTS	GOCC:0043226	Organelle
HOS66	4530.OS03T0123500-02	COMPARTMENTS	GOCC:0043227	Membrane-bounded organelle
HOS66	4530.OS03T0123500-02	COMPARTMENTS	GOCC:0043229	Intracellular organelle
HOS66	4530.OS03T0123500-02	COMPARTMENTS	GOCC:0043231	Intracellular membrane-bounded organelle
HOS66	4530.OS03T0123500-02	COMPARTMENTS	GOCC:0110165	Cellular anatomical entity
HOS66	4530.OS03T0123500-02	UniProt Keywords	KW-0025	Alternative splicing
HOS66	4530.OS03T0123500-02	UniProt Keywords	KW-0238	DNA-binding
HOS66	4530.OS03T0123500-02	UniProt Keywords	KW-0371	Homeobox
HOS66	4530.OS03T0123500-02	UniProt Keywords	KW-0539	Nucleus
HOS66	4530.OS03T0123500-02	Pfam	PF00046	Homeobox domain
HOS66	4530.OS03T0123500-02	Pfam	PF03790	KNOX1 domain
HOS66	4530.OS03T0123500-02	Pfam	PF03791	KNOX2 domain
HOS66	4530.OS03T0123500-02	Pfam	PF05920	Homeobox KN domain
HOS66	4530.OS03T0123500-02	InterPro	IPR001356	Homeobox domain
HOS66	4530.OS03T0123500-02	InterPro	IPR005539	ELK domain
HOS66	4530.OS03T0123500-02	InterPro	IPR005540	KNOX1
HOS66	4530.OS03T0123500-02	InterPro	IPR005541	KNOX2
HOS66	4530.OS03T0123500-02	InterPro	IPR008422	Homeobox KN domain
HOS66	4530.OS03T0123500-02	InterPro	IPR009057	Homeobox-like domain superfamily
HOS66	4530.OS03T0123500-02	SMART	SM00389	Homeodomain
HOS66	4530.OS03T0123500-02	SMART	SM01188	This domain is required for the nuclear localisation of these proteins PUBMED:11352458. All of these proteins are members of the Tale/Knox homeodomain family, a subfamily within homeobox SM00389.
HOS66	4530.OS03T0123500-02	SMART	SM01255	The MEINOX region is comprised of two domains, KNOX1 and KNOX2. KNOX1 plays a role in suppressing target gene expression. KNOX2, essential for function, is thought to be necessary for homo-dimerisation PUBMED:11549765.
HOS66	4530.OS03T0123500-02	SMART	SM01256	The MEINOX region is comprised of two domains, KNOX1 and KNOX2. KNOX1 plays a role in suppressing target gene expression. KNOX2, essential for function, is thought to be necessary for homo-dimerisation PUBMED:11549765.
OS01T0174000-00	4530.OS01T0174000-00	GO Process	GO:0006355	Regulation of transcription, dna-templated
OS01T0174000-00	4530.OS01T0174000-00	GO Process	GO:0007154	Cell communication
OS01T0174000-00	4530.OS01T0174000-00	GO Process	GO:0007165	Signal transduction
OS01T0174000-00	4530.OS01T0174000-00	GO Process	GO:0007602	Phototransduction
OS01T0174000-00	4530.OS01T0174000-00	GO Process	GO:0009314	Response to radiation
OS01T0174000-00	4530.OS01T0174000-00	GO Process	GO:0009411	Response to uv
OS01T0174000-00	4530.OS01T0174000-00	GO Process	GO:0009416	Response to light stimulus
OS01T0174000-00	4530.OS01T0174000-00	GO Process	GO:0009581	Detection of external stimulus
OS01T0174000-00	4530.OS01T0174000-00	GO Process	GO:0009582	Detection of abiotic stimulus
OS01T0174000-00	4530.OS01T0174000-00	GO Process	GO:0009583	Detection of light stimulus
OS01T0174000-00	4530.OS01T0174000-00	GO Process	GO:0009585	Red, far-red light phototransduction
OS01T0174000-00	4530.OS01T0174000-00	GO Process	GO:0009605	Response to external stimulus
OS01T0174000-00	4530.OS01T0174000-00	GO Process	GO:0009606	Tropism
OS01T0174000-00	4530.OS01T0174000-00	GO Process	GO:0009628	Response to abiotic stimulus
OS01T0174000-00	4530.OS01T0174000-00	GO Process	GO:0009629	Response to gravity
OS01T0174000-00	4530.OS01T0174000-00	GO Process	GO:0009630	Gravitropism
OS01T0174000-00	4530.OS01T0174000-00	GO Process	GO:0009639	Response to red or far red light
OS01T0174000-00	4530.OS01T0174000-00	GO Process	GO:0009719	Response to endogenous stimulus
OS01T0174000-00	4530.OS01T0174000-00	GO Process	GO:0009725	Response to hormone
OS01T0174000-00	4530.OS01T0174000-00	GO Process	GO:0009737	Response to abscisic acid
OS01T0174000-00	4530.OS01T0174000-00	GO Process	GO:0009738	Abscisic acid-activated signaling pathway
OS01T0174000-00	4530.OS01T0174000-00	GO Process	GO:0009739	Response to gibberellin
OS01T0174000-00	4530.OS01T0174000-00	GO Process	GO:0009740	Gibberellic acid mediated signaling pathway
OS01T0174000-00	4530.OS01T0174000-00	GO Process	GO:0009755	Hormone-mediated signaling pathway
OS01T0174000-00	4530.OS01T0174000-00	GO Process	GO:0009787	Regulation of abscisic acid-activated signaling pathway
OS01T0174000-00	4530.OS01T0174000-00	GO Process	GO:0009889	Regulation of biosynthetic process
OS01T0174000-00	4530.OS01T0174000-00	GO Process	GO:0009893	Positive regulation of metabolic process
OS01T0174000-00	4530.OS01T0174000-00	GO Process	GO:0009958	Positive gravitropism
OS01T0174000-00	4530.OS01T0174000-00	GO Process	GO:0009966	Regulation of signal transduction
OS01T0174000-00	4530.OS01T0174000-00	GO Process	GO:0009987	Cellular process
OS01T0174000-00	4530.OS01T0174000-00	GO Process	GO:0010017	Red or far-red light signaling pathway
OS01T0174000-00	4530.OS01T0174000-00	GO Process	GO:0010033	Response to organic substance
OS01T0174000-00	4530.OS01T0174000-00	GO Process	GO:0010099	Regulation of photomorphogenesis
OS01T0174000-00	4530.OS01T0174000-00	GO Process	GO:0010114	Response to red light
OS01T0174000-00	4530.OS01T0174000-00	GO Process	GO:0010218	Response to far red light
OS01T0174000-00	4530.OS01T0174000-00	GO Process	GO:0010224	Response to uv-b
OS01T0174000-00	4530.OS01T0174000-00	GO Process	GO:0010468	Regulation of gene expression
OS01T0174000-00	4530.OS01T0174000-00	GO Process	GO:0010476	Gibberellin mediated signaling pathway
OS01T0174000-00	4530.OS01T0174000-00	GO Process	GO:0010556	Regulation of macromolecule biosynthetic process
OS01T0174000-00	4530.OS01T0174000-00	GO Process	GO:0010646	Regulation of cell communication
OS01T0174000-00	4530.OS01T0174000-00	GO Process	GO:0019219	Regulation of nucleobase-containing compound metabolic process
OS01T0174000-00	4530.OS01T0174000-00	GO Process	GO:0019222	Regulation of metabolic process
OS01T0174000-00	4530.OS01T0174000-00	GO Process	GO:0023051	Regulation of signaling
OS01T0174000-00	4530.OS01T0174000-00	GO Process	GO:0023052	Signaling
OS01T0174000-00	4530.OS01T0174000-00	GO Process	GO:0031323	Regulation of cellular metabolic process
OS01T0174000-00	4530.OS01T0174000-00	GO Process	GO:0031326	Regulation of cellular biosynthetic process
OS01T0174000-00	4530.OS01T0174000-00	GO Process	GO:0031537	Regulation of anthocyanin metabolic process
OS01T0174000-00	4530.OS01T0174000-00	GO Process	GO:0031539	Positive regulation of anthocyanin metabolic process
OS01T0174000-00	4530.OS01T0174000-00	GO Process	GO:0032870	Cellular response to hormone stimulus
OS01T0174000-00	4530.OS01T0174000-00	GO Process	GO:0033993	Response to lipid
OS01T0174000-00	4530.OS01T0174000-00	GO Process	GO:0042221	Response to chemical
OS01T0174000-00	4530.OS01T0174000-00	GO Process	GO:0042752	Regulation of circadian rhythm
OS01T0174000-00	4530.OS01T0174000-00	GO Process	GO:0042753	Positive regulation of circadian rhythm
OS01T0174000-00	4530.OS01T0174000-00	GO Process	GO:0048518	Positive regulation of biological process
OS01T0174000-00	4530.OS01T0174000-00	GO Process	GO:0048580	Regulation of post-embryonic development
OS01T0174000-00	4530.OS01T0174000-00	GO Process	GO:0048583	Regulation of response to stimulus
OS01T0174000-00	4530.OS01T0174000-00	GO Process	GO:0050789	Regulation of biological process
OS01T0174000-00	4530.OS01T0174000-00	GO Process	GO:0050793	Regulation of developmental process
OS01T0174000-00	4530.OS01T0174000-00	GO Process	GO:0050794	Regulation of cellular process
OS01T0174000-00	4530.OS01T0174000-00	GO Process	GO:0050896	Response to stimulus
OS01T0174000-00	4530.OS01T0174000-00	GO Process	GO:0051171	Regulation of nitrogen compound metabolic process
OS01T0174000-00	4530.OS01T0174000-00	GO Process	GO:0051239	Regulation of multicellular organismal process
OS01T0174000-00	4530.OS01T0174000-00	GO Process	GO:0051252	Regulation of rna metabolic process
OS01T0174000-00	4530.OS01T0174000-00	GO Process	GO:0051606	Detection of stimulus
OS01T0174000-00	4530.OS01T0174000-00	GO Process	GO:0051716	Cellular response to stimulus
OS01T0174000-00	4530.OS01T0174000-00	GO Process	GO:0060255	Regulation of macromolecule metabolic process
OS01T0174000-00	4530.OS01T0174000-00	GO Process	GO:0065007	Biological regulation
OS01T0174000-00	4530.OS01T0174000-00	GO Process	GO:0065009	Regulation of molecular function
OS01T0174000-00	4530.OS01T0174000-00	GO Process	GO:0070887	Cellular response to chemical stimulus
OS01T0174000-00	4530.OS01T0174000-00	GO Process	GO:0071214	Cellular response to abiotic stimulus
OS01T0174000-00	4530.OS01T0174000-00	GO Process	GO:0071215	Cellular response to abscisic acid stimulus
OS01T0174000-00	4530.OS01T0174000-00	GO Process	GO:0071310	Cellular response to organic substance
OS01T0174000-00	4530.OS01T0174000-00	GO Process	GO:0071370	Cellular response to gibberellin stimulus
OS01T0174000-00	4530.OS01T0174000-00	GO Process	GO:0071396	Cellular response to lipid
OS01T0174000-00	4530.OS01T0174000-00	GO Process	GO:0071478	Cellular response to radiation
OS01T0174000-00	4530.OS01T0174000-00	GO Process	GO:0071482	Cellular response to light stimulus
OS01T0174000-00	4530.OS01T0174000-00	GO Process	GO:0071489	Cellular response to red or far red light
OS01T0174000-00	4530.OS01T0174000-00	GO Process	GO:0071495	Cellular response to endogenous stimulus
OS01T0174000-00	4530.OS01T0174000-00	GO Process	GO:0080090	Regulation of primary metabolic process
OS01T0174000-00	4530.OS01T0174000-00	GO Process	GO:0080167	Response to karrikin
OS01T0174000-00	4530.OS01T0174000-00	GO Process	GO:0097305	Response to alcohol
OS01T0174000-00	4530.OS01T0174000-00	GO Process	GO:0097306	Cellular response to alcohol
OS01T0174000-00	4530.OS01T0174000-00	GO Process	GO:0104004	Cellular response to environmental stimulus
OS01T0174000-00	4530.OS01T0174000-00	GO Process	GO:1901419	Regulation of response to alcohol
OS01T0174000-00	4530.OS01T0174000-00	GO Process	GO:1901700	Response to oxygen-containing compound
OS01T0174000-00	4530.OS01T0174000-00	GO Process	GO:1901701	Cellular response to oxygen-containing compound
OS01T0174000-00	4530.OS01T0174000-00	GO Process	GO:1903506	Regulation of nucleic acid-templated transcription
OS01T0174000-00	4530.OS01T0174000-00	GO Process	GO:1905957	Regulation of cellular response to alcohol
OS01T0174000-00	4530.OS01T0174000-00	GO Process	GO:2000026	Regulation of multicellular organismal development
OS01T0174000-00	4530.OS01T0174000-00	GO Process	GO:2000030	Regulation of response to red or far red light
OS01T0174000-00	4530.OS01T0174000-00	GO Process	GO:2000112	Regulation of cellular macromolecule biosynthetic process
OS01T0174000-00	4530.OS01T0174000-00	GO Process	GO:2001141	Regulation of rna biosynthetic process
OS01T0174000-00	4530.OS01T0174000-00	GO Function	GO:0000976	Transcription regulatory region sequence-specific dna binding
OS01T0174000-00	4530.OS01T0174000-00	GO Function	GO:0001067	Regulatory region nucleic acid binding
OS01T0174000-00	4530.OS01T0174000-00	GO Function	GO:0003676	Nucleic acid binding
OS01T0174000-00	4530.OS01T0174000-00	GO Function	GO:0003677	DNA binding
OS01T0174000-00	4530.OS01T0174000-00	GO Function	GO:0003690	Double-stranded dna binding
OS01T0174000-00	4530.OS01T0174000-00	GO Function	GO:0003700	DNA-binding transcription factor activity
OS01T0174000-00	4530.OS01T0174000-00	GO Function	GO:0005488	Binding
OS01T0174000-00	4530.OS01T0174000-00	GO Function	GO:0043565	Sequence-specific dna binding
OS01T0174000-00	4530.OS01T0174000-00	GO Function	GO:0097159	Organic cyclic compound binding
OS01T0174000-00	4530.OS01T0174000-00	GO Function	GO:0098772	Molecular function regulator
OS01T0174000-00	4530.OS01T0174000-00	GO Function	GO:0140110	Transcription regulator activity
OS01T0174000-00	4530.OS01T0174000-00	GO Function	GO:1901363	Heterocyclic compound binding
OS01T0174000-00	4530.OS01T0174000-00	GO Function	GO:1990837	Sequence-specific double-stranded dna binding
OS01T0174000-00	4530.OS01T0174000-00	GO Component	GO:0005622	Intracellular
OS01T0174000-00	4530.OS01T0174000-00	GO Component	GO:0005634	Nucleus
OS01T0174000-00	4530.OS01T0174000-00	GO Component	GO:0032991	Protein-containing complex
OS01T0174000-00	4530.OS01T0174000-00	GO Component	GO:0032993	protein-DNA complex
OS01T0174000-00	4530.OS01T0174000-00	GO Component	GO:0043226	Organelle
OS01T0174000-00	4530.OS01T0174000-00	GO Component	GO:0043227	Membrane-bounded organelle
OS01T0174000-00	4530.OS01T0174000-00	GO Component	GO:0043229	Intracellular organelle
OS01T0174000-00	4530.OS01T0174000-00	GO Component	GO:0043231	Intracellular membrane-bounded organelle
OS01T0174000-00	4530.OS01T0174000-00	GO Component	GO:0110165	Cellular anatomical entity
OS01T0174000-00	4530.OS01T0174000-00	STRING clusters	CL:15962	Mixed, incl. circadian rhythm - plant, and b-box-type zinc finger
OS01T0174000-00	4530.OS01T0174000-00	STRING clusters	CL:15963	Mixed, incl. circadian rhythm - plant, and b-box-type zinc finger
OS01T0174000-00	4530.OS01T0174000-00	STRING clusters	CL:15964	Mixed, incl. circadian rhythm - plant, and b-box-type zinc finger
OS01T0174000-00	4530.OS01T0174000-00	STRING clusters	CL:15965	Mixed, incl. circadian rhythm - plant, and b-box-type zinc finger
OS01T0174000-00	4530.OS01T0174000-00	STRING clusters	CL:15967	Mixed, incl. photoreceptor activity, and circadian rhythm - plant
OS01T0174000-00	4530.OS01T0174000-00	STRING clusters	CL:16098	B-Box-type zinc finger, and positive regulation of anthocyanin metabolic process
OS01T0174000-00	4530.OS01T0174000-00	STRING clusters	CL:16100	Mixed, incl. positive regulation of photosynthesis, and positive regulation of anthocyanin metabolic process
OS01T0174000-00	4530.OS01T0174000-00	STRING clusters	CL:16102	Positive regulation of photosynthesis, and positive regulation of anthocyanin metabolic process
OS01T0174000-00	4530.OS01T0174000-00	COMPARTMENTS	GOCC:0005622	Intracellular
OS01T0174000-00	4530.OS01T0174000-00	COMPARTMENTS	GOCC:0005634	Nucleus
OS01T0174000-00	4530.OS01T0174000-00	COMPARTMENTS	GOCC:0043226	Organelle
OS01T0174000-00	4530.OS01T0174000-00	COMPARTMENTS	GOCC:0043227	Membrane-bounded organelle
OS01T0174000-00	4530.OS01T0174000-00	COMPARTMENTS	GOCC:0043229	Intracellular organelle
OS01T0174000-00	4530.OS01T0174000-00	COMPARTMENTS	GOCC:0043231	Intracellular membrane-bounded organelle
OS01T0174000-00	4530.OS01T0174000-00	COMPARTMENTS	GOCC:0110165	Cellular anatomical entity
OS01T0174000-00	4530.OS01T0174000-00	Pfam	PF00170	bZIP transcription factor
OS01T0174000-00	4530.OS01T0174000-00	Pfam	PF07716	Basic region leucine zipper
OS01T0174000-00	4530.OS01T0174000-00	InterPro	IPR004827	Basic-leucine zipper domain
OS01T0174000-00	4530.OS01T0174000-00	SMART	SM00338	Basic region leucin zipper
OS02T0710900-01	4530.OS02T0710900-01	GO Process	GO:0001666	Response to hypoxia
OS02T0710900-01	4530.OS02T0710900-01	GO Process	GO:0006950	Response to stress
OS02T0710900-01	4530.OS02T0710900-01	GO Process	GO:0009628	Response to abiotic stimulus
OS02T0710900-01	4530.OS02T0710900-01	GO Process	GO:0009966	Regulation of signal transduction
OS02T0710900-01	4530.OS02T0710900-01	GO Process	GO:0009968	Negative regulation of signal transduction
OS02T0710900-01	4530.OS02T0710900-01	GO Process	GO:0009987	Cellular process
OS02T0710900-01	4530.OS02T0710900-01	GO Process	GO:0010646	Regulation of cell communication
OS02T0710900-01	4530.OS02T0710900-01	GO Process	GO:0010648	Negative regulation of cell communication
OS02T0710900-01	4530.OS02T0710900-01	GO Process	GO:0010941	Regulation of cell death
OS02T0710900-01	4530.OS02T0710900-01	GO Process	GO:0023051	Regulation of signaling
OS02T0710900-01	4530.OS02T0710900-01	GO Process	GO:0023057	Negative regulation of signaling
OS02T0710900-01	4530.OS02T0710900-01	GO Process	GO:0033554	Cellular response to stress
OS02T0710900-01	4530.OS02T0710900-01	GO Process	GO:0036293	Response to decreased oxygen levels
OS02T0710900-01	4530.OS02T0710900-01	GO Process	GO:0036294	Cellular response to decreased oxygen levels
OS02T0710900-01	4530.OS02T0710900-01	GO Process	GO:0042221	Response to chemical
OS02T0710900-01	4530.OS02T0710900-01	GO Process	GO:0042981	Regulation of apoptotic process
OS02T0710900-01	4530.OS02T0710900-01	GO Process	GO:0043066	Negative regulation of apoptotic process
OS02T0710900-01	4530.OS02T0710900-01	GO Process	GO:0043067	Regulation of programmed cell death
OS02T0710900-01	4530.OS02T0710900-01	GO Process	GO:0043069	Negative regulation of programmed cell death
OS02T0710900-01	4530.OS02T0710900-01	GO Process	GO:0048519	Negative regulation of biological process
OS02T0710900-01	4530.OS02T0710900-01	GO Process	GO:0048523	Negative regulation of cellular process
OS02T0710900-01	4530.OS02T0710900-01	GO Process	GO:0048583	Regulation of response to stimulus
OS02T0710900-01	4530.OS02T0710900-01	GO Process	GO:0048585	Negative regulation of response to stimulus
OS02T0710900-01	4530.OS02T0710900-01	GO Process	GO:0050789	Regulation of biological process
OS02T0710900-01	4530.OS02T0710900-01	GO Process	GO:0050794	Regulation of cellular process
OS02T0710900-01	4530.OS02T0710900-01	GO Process	GO:0050896	Response to stimulus
OS02T0710900-01	4530.OS02T0710900-01	GO Process	GO:0051716	Cellular response to stimulus
OS02T0710900-01	4530.OS02T0710900-01	GO Process	GO:0060548	Negative regulation of cell death
OS02T0710900-01	4530.OS02T0710900-01	GO Process	GO:0065007	Biological regulation
OS02T0710900-01	4530.OS02T0710900-01	GO Process	GO:0070482	Response to oxygen levels
OS02T0710900-01	4530.OS02T0710900-01	GO Process	GO:0070887	Cellular response to chemical stimulus
OS02T0710900-01	4530.OS02T0710900-01	GO Process	GO:0071453	Cellular response to oxygen levels
OS02T0710900-01	4530.OS02T0710900-01	GO Process	GO:0071456	Cellular response to hypoxia
OS02T0710900-01	4530.OS02T0710900-01	GO Process	GO:0080134	Regulation of response to stress
OS02T0710900-01	4530.OS02T0710900-01	GO Process	GO:0080135	Regulation of cellular response to stress
OS02T0710900-01	4530.OS02T0710900-01	GO Process	GO:1900037	Regulation of cellular response to hypoxia
OS02T0710900-01	4530.OS02T0710900-01	GO Process	GO:1900038	Negative regulation of cellular response to hypoxia
OS02T0710900-01	4530.OS02T0710900-01	GO Process	GO:1902531	Regulation of intracellular signal transduction
OS02T0710900-01	4530.OS02T0710900-01	GO Process	GO:1902532	Negative regulation of intracellular signal transduction
OS02T0710900-01	4530.OS02T0710900-01	GO Process	GO:1903297	Regulation of hypoxia-induced intrinsic apoptotic signaling pathway
OS02T0710900-01	4530.OS02T0710900-01	GO Process	GO:1903298	Negative regulation of hypoxia-induced intrinsic apoptotic signaling pathway
OS02T0710900-01	4530.OS02T0710900-01	GO Process	GO:2001233	Regulation of apoptotic signaling pathway
OS02T0710900-01	4530.OS02T0710900-01	GO Process	GO:2001234	Negative regulation of apoptotic signaling pathway
OS02T0710900-01	4530.OS02T0710900-01	GO Process	GO:2001242	Regulation of intrinsic apoptotic signaling pathway
OS02T0710900-01	4530.OS02T0710900-01	GO Process	GO:2001243	Negative regulation of intrinsic apoptotic signaling pathway
OS02T0710900-01	4530.OS02T0710900-01	GO Function	GO:0000166	Nucleotide binding
OS02T0710900-01	4530.OS02T0710900-01	GO Function	GO:0005488	Binding
OS02T0710900-01	4530.OS02T0710900-01	GO Function	GO:0005524	ATP binding
OS02T0710900-01	4530.OS02T0710900-01	GO Function	GO:0017076	Purine nucleotide binding
OS02T0710900-01	4530.OS02T0710900-01	GO Function	GO:0030554	Adenyl nucleotide binding
OS02T0710900-01	4530.OS02T0710900-01	GO Function	GO:0032553	Ribonucleotide binding
OS02T0710900-01	4530.OS02T0710900-01	GO Function	GO:0032555	Purine ribonucleotide binding
OS02T0710900-01	4530.OS02T0710900-01	GO Function	GO:0032559	Adenyl ribonucleotide binding
OS02T0710900-01	4530.OS02T0710900-01	GO Function	GO:0035639	Purine ribonucleoside triphosphate binding
OS02T0710900-01	4530.OS02T0710900-01	GO Function	GO:0036094	Small molecule binding
OS02T0710900-01	4530.OS02T0710900-01	GO Function	GO:0043167	Ion binding
OS02T0710900-01	4530.OS02T0710900-01	GO Function	GO:0043168	Anion binding
OS02T0710900-01	4530.OS02T0710900-01	GO Function	GO:0097159	Organic cyclic compound binding
OS02T0710900-01	4530.OS02T0710900-01	GO Function	GO:0097367	Carbohydrate derivative binding
OS02T0710900-01	4530.OS02T0710900-01	GO Function	GO:1901265	Nucleoside phosphate binding
OS02T0710900-01	4530.OS02T0710900-01	GO Function	GO:1901363	Heterocyclic compound binding
OS02T0710900-01	4530.OS02T0710900-01	GO Component	GO:0005622	Intracellular
OS02T0710900-01	4530.OS02T0710900-01	GO Component	GO:0005737	Cytoplasm
OS02T0710900-01	4530.OS02T0710900-01	GO Component	GO:0005773	Vacuole
OS02T0710900-01	4530.OS02T0710900-01	GO Component	GO:0005774	Vacuolar membrane
OS02T0710900-01	4530.OS02T0710900-01	GO Component	GO:0005783	Endoplasmic reticulum
OS02T0710900-01	4530.OS02T0710900-01	GO Component	GO:0005788	Endoplasmic reticulum lumen
OS02T0710900-01	4530.OS02T0710900-01	GO Component	GO:0005794	Golgi apparatus
OS02T0710900-01	4530.OS02T0710900-01	GO Component	GO:0005829	Cytosol
OS02T0710900-01	4530.OS02T0710900-01	GO Component	GO:0012505	Endomembrane system
OS02T0710900-01	4530.OS02T0710900-01	GO Component	GO:0016020	Membrane
OS02T0710900-01	4530.OS02T0710900-01	GO Component	GO:0031090	Organelle membrane
OS02T0710900-01	4530.OS02T0710900-01	GO Component	GO:0031410	Cytoplasmic vesicle
OS02T0710900-01	4530.OS02T0710900-01	GO Component	GO:0031974	Membrane-enclosed lumen
OS02T0710900-01	4530.OS02T0710900-01	GO Component	GO:0031982	Vesicle
OS02T0710900-01	4530.OS02T0710900-01	GO Component	GO:0032991	Protein-containing complex
OS02T0710900-01	4530.OS02T0710900-01	GO Component	GO:0034663	Endoplasmic reticulum chaperone complex
OS02T0710900-01	4530.OS02T0710900-01	GO Component	GO:0043226	Organelle
OS02T0710900-01	4530.OS02T0710900-01	GO Component	GO:0043227	Membrane-bounded organelle
OS02T0710900-01	4530.OS02T0710900-01	GO Component	GO:0043229	Intracellular organelle
OS02T0710900-01	4530.OS02T0710900-01	GO Component	GO:0043231	Intracellular membrane-bounded organelle
OS02T0710900-01	4530.OS02T0710900-01	GO Component	GO:0043233	Organelle lumen
OS02T0710900-01	4530.OS02T0710900-01	GO Component	GO:0070013	Intracellular organelle lumen
OS02T0710900-01	4530.OS02T0710900-01	GO Component	GO:0097708	Intracellular vesicle
OS02T0710900-01	4530.OS02T0710900-01	GO Component	GO:0098588	Bounding membrane of organelle
OS02T0710900-01	4530.OS02T0710900-01	GO Component	GO:0098805	Whole membrane
OS02T0710900-01	4530.OS02T0710900-01	GO Component	GO:0099503	Secretory vesicle
OS02T0710900-01	4530.OS02T0710900-01	GO Component	GO:0110165	Cellular anatomical entity
OS02T0710900-01	4530.OS02T0710900-01	STRING clusters	CL:5505	Mixed, incl. protein export, and endoplasmic reticulum lumen
OS02T0710900-01	4530.OS02T0710900-01	STRING clusters	CL:5506	Endoplasmic reticulum lumen, and seven-hairpin glycosidases
OS02T0710900-01	4530.OS02T0710900-01	STRING clusters	CL:5507	Endoplasmic reticulum lumen, and protein disulfide isomerase activity
OS02T0710900-01	4530.OS02T0710900-01	STRING clusters	CL:5508	Endoplasmic reticulum lumen, and protein disulfide isomerase activity
OS02T0710900-01	4530.OS02T0710900-01	STRING clusters	CL:5510	Endoplasmic reticulum lumen, and protein disulfide isomerase activity
OS02T0710900-01	4530.OS02T0710900-01	STRING clusters	CL:5551	Mixed, incl. ken domain, and regulation of cellular response to hypoxia
OS02T0710900-01	4530.OS02T0710900-01	COMPARTMENTS	GOCC:0005622	Intracellular
OS02T0710900-01	4530.OS02T0710900-01	COMPARTMENTS	GOCC:0005737	Cytoplasm
OS02T0710900-01	4530.OS02T0710900-01	COMPARTMENTS	GOCC:0005773	Vacuole
OS02T0710900-01	4530.OS02T0710900-01	COMPARTMENTS	GOCC:0005774	Vacuolar membrane
OS02T0710900-01	4530.OS02T0710900-01	COMPARTMENTS	GOCC:0005783	Endoplasmic reticulum
OS02T0710900-01	4530.OS02T0710900-01	COMPARTMENTS	GOCC:0005794	Golgi apparatus
OS02T0710900-01	4530.OS02T0710900-01	COMPARTMENTS	GOCC:0012505	Endomembrane system
OS02T0710900-01	4530.OS02T0710900-01	COMPARTMENTS	GOCC:0016020	Membrane
OS02T0710900-01	4530.OS02T0710900-01	COMPARTMENTS	GOCC:0031090	Organelle membrane
OS02T0710900-01	4530.OS02T0710900-01	COMPARTMENTS	GOCC:0031410	Cytoplasmic vesicle
OS02T0710900-01	4530.OS02T0710900-01	COMPARTMENTS	GOCC:0031982	Vesicle
OS02T0710900-01	4530.OS02T0710900-01	COMPARTMENTS	GOCC:0032991	Protein-containing complex
OS02T0710900-01	4530.OS02T0710900-01	COMPARTMENTS	GOCC:0034663	Endoplasmic reticulum chaperone complex
OS02T0710900-01	4530.OS02T0710900-01	COMPARTMENTS	GOCC:0043226	Organelle
OS02T0710900-01	4530.OS02T0710900-01	COMPARTMENTS	GOCC:0043227	Membrane-bounded organelle
OS02T0710900-01	4530.OS02T0710900-01	COMPARTMENTS	GOCC:0043229	Intracellular organelle
OS02T0710900-01	4530.OS02T0710900-01	COMPARTMENTS	GOCC:0043231	Intracellular membrane-bounded organelle
OS02T0710900-01	4530.OS02T0710900-01	COMPARTMENTS	GOCC:0097708	Intracellular vesicle
OS02T0710900-01	4530.OS02T0710900-01	COMPARTMENTS	GOCC:0098588	Bounding membrane of organelle
OS02T0710900-01	4530.OS02T0710900-01	COMPARTMENTS	GOCC:0098805	Whole membrane
OS02T0710900-01	4530.OS02T0710900-01	COMPARTMENTS	GOCC:0099503	Secretory vesicle
OS02T0710900-01	4530.OS02T0710900-01	COMPARTMENTS	GOCC:0110165	Cellular anatomical entity
OS02T0710900-01	4530.OS02T0710900-01	Pfam	PF00012	Hsp70 protein
OS02T0710900-01	4530.OS02T0710900-01	Pfam	PF06723	MreB/Mbl protein
OS02T0710900-01	4530.OS02T0710900-01	InterPro	IPR013126	Heat shock protein 70 family
OS02T0710900-01	4530.OS02T0710900-01	InterPro	IPR018181	Heat shock protein 70, conserved site
OS02T0710900-01	4530.OS02T0710900-01	InterPro	IPR029047	Heat shock protein 70kD, peptide-binding domain superfamily
OS02T0710900-01	4530.OS02T0710900-01	InterPro	IPR029048	Heat shock protein 70kD, C-terminal domain superfamily
OS02T0710900-01	4530.OS02T0710900-01	InterPro	IPR043129	ATPase, nucleotide binding domain
OS04T0639200-01	4530.OS04T0639200-01	GO Process	GO:0006091	Generation of precursor metabolites and energy
OS04T0639200-01	4530.OS04T0639200-01	GO Process	GO:0006950	Response to stress
OS04T0639200-01	4530.OS04T0639200-01	GO Process	GO:0008152	Metabolic process
OS04T0639200-01	4530.OS04T0639200-01	GO Process	GO:0009314	Response to radiation
OS04T0639200-01	4530.OS04T0639200-01	GO Process	GO:0009411	Response to uv
OS04T0639200-01	4530.OS04T0639200-01	GO Process	GO:0009416	Response to light stimulus
OS04T0639200-01	4530.OS04T0639200-01	GO Process	GO:0009611	Response to wounding
OS04T0639200-01	4530.OS04T0639200-01	GO Process	GO:0009628	Response to abiotic stimulus
OS04T0639200-01	4530.OS04T0639200-01	GO Process	GO:0009642	Response to light intensity
OS04T0639200-01	4530.OS04T0639200-01	GO Process	GO:0009644	Response to high light intensity
OS04T0639200-01	4530.OS04T0639200-01	GO Process	GO:0009765	Photosynthesis, light harvesting
OS04T0639200-01	4530.OS04T0639200-01	GO Process	GO:0009987	Cellular process
OS04T0639200-01	4530.OS04T0639200-01	GO Process	GO:0015979	Photosynthesis
OS04T0639200-01	4530.OS04T0639200-01	GO Process	GO:0019684	Photosynthesis, light reaction
OS04T0639200-01	4530.OS04T0639200-01	GO Process	GO:0034644	Cellular response to uv
OS04T0639200-01	4530.OS04T0639200-01	GO Process	GO:0044237	Cellular metabolic process
OS04T0639200-01	4530.OS04T0639200-01	GO Process	GO:0050896	Response to stimulus
OS04T0639200-01	4530.OS04T0639200-01	GO Process	GO:0051716	Cellular response to stimulus
OS04T0639200-01	4530.OS04T0639200-01	GO Process	GO:0070141	Response to uv-a
OS04T0639200-01	4530.OS04T0639200-01	GO Process	GO:0071214	Cellular response to abiotic stimulus
OS04T0639200-01	4530.OS04T0639200-01	GO Process	GO:0071478	Cellular response to radiation
OS04T0639200-01	4530.OS04T0639200-01	GO Process	GO:0071482	Cellular response to light stimulus
OS04T0639200-01	4530.OS04T0639200-01	GO Process	GO:0071484	Cellular response to light intensity
OS04T0639200-01	4530.OS04T0639200-01	GO Process	GO:0071486	Cellular response to high light intensity
OS04T0639200-01	4530.OS04T0639200-01	GO Process	GO:0071492	Cellular response to uv-a
OS04T0639200-01	4530.OS04T0639200-01	GO Process	GO:0104004	Cellular response to environmental stimulus
OS04T0639200-01	4530.OS04T0639200-01	GO Function	GO:0005488	Binding
OS04T0639200-01	4530.OS04T0639200-01	GO Function	GO:0016168	Chlorophyll binding
OS04T0639200-01	4530.OS04T0639200-01	GO Function	GO:0043167	Ion binding
OS04T0639200-01	4530.OS04T0639200-01	GO Function	GO:0043168	Anion binding
OS04T0639200-01	4530.OS04T0639200-01	GO Function	GO:0046906	Tetrapyrrole binding
OS04T0639200-01	4530.OS04T0639200-01	GO Function	GO:0097159	Organic cyclic compound binding
OS04T0639200-01	4530.OS04T0639200-01	GO Function	GO:1901363	Heterocyclic compound binding
OS04T0639200-01	4530.OS04T0639200-01	GO Component	GO:0005622	Intracellular
OS04T0639200-01	4530.OS04T0639200-01	GO Component	GO:0005737	Cytoplasm
OS04T0639200-01	4530.OS04T0639200-01	GO Component	GO:0009507	Chloroplast
OS04T0639200-01	4530.OS04T0639200-01	GO Component	GO:0009521	Photosystem
OS04T0639200-01	4530.OS04T0639200-01	GO Component	GO:0009523	Photosystem ii
OS04T0639200-01	4530.OS04T0639200-01	GO Component	GO:0009534	Chloroplast thylakoid
OS04T0639200-01	4530.OS04T0639200-01	GO Component	GO:0009535	Chloroplast thylakoid membrane
OS04T0639200-01	4530.OS04T0639200-01	GO Component	GO:0009536	Plastid
OS04T0639200-01	4530.OS04T0639200-01	GO Component	GO:0009579	Thylakoid
OS04T0639200-01	4530.OS04T0639200-01	GO Component	GO:0016020	Membrane
OS04T0639200-01	4530.OS04T0639200-01	GO Component	GO:0016021	Integral component of membrane
OS04T0639200-01	4530.OS04T0639200-01	GO Component	GO:0031224	Intrinsic component of membrane
OS04T0639200-01	4530.OS04T0639200-01	GO Component	GO:0031976	Plastid thylakoid
OS04T0639200-01	4530.OS04T0639200-01	GO Component	GO:0031984	Organelle subcompartment
OS04T0639200-01	4530.OS04T0639200-01	GO Component	GO:0032991	Protein-containing complex
OS04T0639200-01	4530.OS04T0639200-01	GO Component	GO:0034357	Photosynthetic membrane
OS04T0639200-01	4530.OS04T0639200-01	GO Component	GO:0042651	Thylakoid membrane
OS04T0639200-01	4530.OS04T0639200-01	GO Component	GO:0043226	Organelle
OS04T0639200-01	4530.OS04T0639200-01	GO Component	GO:0043227	Membrane-bounded organelle
OS04T0639200-01	4530.OS04T0639200-01	GO Component	GO:0043229	Intracellular organelle
OS04T0639200-01	4530.OS04T0639200-01	GO Component	GO:0043231	Intracellular membrane-bounded organelle
OS04T0639200-01	4530.OS04T0639200-01	GO Component	GO:0055035	Plastid thylakoid membrane
OS04T0639200-01	4530.OS04T0639200-01	GO Component	GO:0098796	Membrane protein complex
OS04T0639200-01	4530.OS04T0639200-01	GO Component	GO:0110165	Cellular anatomical entity
OS04T0639200-01	4530.OS04T0639200-01	STRING clusters	CL:28130	Mixed, incl. myb-like dna-binding domain, and calmodulin binding protein-like
OS04T0639200-01	4530.OS04T0639200-01	STRING clusters	CL:28131	Mixed, incl. myb-like dna-binding domain, and calmodulin binding protein-like
OS04T0639200-01	4530.OS04T0639200-01	STRING clusters	CL:28132	Mixed, incl. myb-like dna-binding domain, and crc domain
OS04T0639200-01	4530.OS04T0639200-01	STRING clusters	CL:28133	Mixed, incl. calmodulin binding protein-like, and crc domain
OS04T0639200-01	4530.OS04T0639200-01	STRING clusters	CL:28134	Mixed, incl. calmodulin binding protein-like, and crc domain
OS04T0639200-01	4530.OS04T0639200-01	STRING clusters	CL:28135	Mixed, incl. calmodulin binding protein-like, and crc domain
OS04T0639200-01	4530.OS04T0639200-01	STRING clusters	CL:28199	Mixed, incl. sant domain, and molybdate transporter 1/2
OS04T0639200-01	4530.OS04T0639200-01	STRING clusters	CL:28200	Mixed, incl. molybdate transporter 1/2, and regulation of peroxidase activity
OS04T0639200-01	4530.OS04T0639200-01	STRING clusters	CL:28201	Mostly uncharacterized, incl. response to uv-a, and short internodes, c-terminal
OS04T0639200-01	4530.OS04T0639200-01	COMPARTMENTS	GOCC:0005622	Intracellular
OS04T0639200-01	4530.OS04T0639200-01	COMPARTMENTS	GOCC:0005737	Cytoplasm
OS04T0639200-01	4530.OS04T0639200-01	COMPARTMENTS	GOCC:0009507	Chloroplast
OS04T0639200-01	4530.OS04T0639200-01	COMPARTMENTS	GOCC:0009534	Chloroplast thylakoid
OS04T0639200-01	4530.OS04T0639200-01	COMPARTMENTS	GOCC:0009535	Chloroplast thylakoid membrane
OS04T0639200-01	4530.OS04T0639200-01	COMPARTMENTS	GOCC:0009536	Plastid
OS04T0639200-01	4530.OS04T0639200-01	COMPARTMENTS	GOCC:0009579	Thylakoid
OS04T0639200-01	4530.OS04T0639200-01	COMPARTMENTS	GOCC:0016020	Membrane
OS04T0639200-01	4530.OS04T0639200-01	COMPARTMENTS	GOCC:0031976	Plastid thylakoid
OS04T0639200-01	4530.OS04T0639200-01	COMPARTMENTS	GOCC:0031984	Organelle subcompartment
OS04T0639200-01	4530.OS04T0639200-01	COMPARTMENTS	GOCC:0034357	Photosynthetic membrane
OS04T0639200-01	4530.OS04T0639200-01	COMPARTMENTS	GOCC:0042651	Thylakoid membrane
OS04T0639200-01	4530.OS04T0639200-01	COMPARTMENTS	GOCC:0043226	Organelle
OS04T0639200-01	4530.OS04T0639200-01	COMPARTMENTS	GOCC:0043227	Membrane-bounded organelle
OS04T0639200-01	4530.OS04T0639200-01	COMPARTMENTS	GOCC:0043229	Intracellular organelle
OS04T0639200-01	4530.OS04T0639200-01	COMPARTMENTS	GOCC:0043231	Intracellular membrane-bounded organelle
OS04T0639200-01	4530.OS04T0639200-01	COMPARTMENTS	GOCC:0055035	Plastid thylakoid membrane
OS04T0639200-01	4530.OS04T0639200-01	COMPARTMENTS	GOCC:0110165	Cellular anatomical entity
OS04T0639200-01	4530.OS04T0639200-01	Pfam	PF00504	Chlorophyll A-B binding protein
OS04T0639200-01	4530.OS04T0639200-01	InterPro	IPR022796	Chlorophyll A-B binding protein
OS04T0639200-01	4530.OS04T0639200-01	InterPro	IPR023329	Chlorophyll a/b binding domain superfamily
OS06T0182300-01	4530.OS06T0182300-01	GO Process	GO:0000003	Reproduction
OS06T0182300-01	4530.OS06T0182300-01	GO Process	GO:0000271	Polysaccharide biosynthetic process
OS06T0182300-01	4530.OS06T0182300-01	GO Process	GO:0000902	Cell morphogenesis
OS06T0182300-01	4530.OS06T0182300-01	GO Process	GO:0000904	Cell morphogenesis involved in differentiation
OS06T0182300-01	4530.OS06T0182300-01	GO Process	GO:0001558	Regulation of cell growth
OS06T0182300-01	4530.OS06T0182300-01	GO Process	GO:0003006	Developmental process involved in reproduction
OS06T0182300-01	4530.OS06T0182300-01	GO Process	GO:0005975	Carbohydrate metabolic process
OS06T0182300-01	4530.OS06T0182300-01	GO Process	GO:0005976	Polysaccharide metabolic process
OS06T0182300-01	4530.OS06T0182300-01	GO Process	GO:0006073	Cellular glucan metabolic process
OS06T0182300-01	4530.OS06T0182300-01	GO Process	GO:0006074	(1->3)-beta-D-glucan metabolic process
OS06T0182300-01	4530.OS06T0182300-01	GO Process	GO:0006075	(1->3)-beta-D-glucan biosynthetic process
OS06T0182300-01	4530.OS06T0182300-01	GO Process	GO:0007049	Cell cycle
OS06T0182300-01	4530.OS06T0182300-01	GO Process	GO:0007275	Multicellular organism development
OS06T0182300-01	4530.OS06T0182300-01	GO Process	GO:0008152	Metabolic process
OS06T0182300-01	4530.OS06T0182300-01	GO Process	GO:0008360	Regulation of cell shape
OS06T0182300-01	4530.OS06T0182300-01	GO Process	GO:0009058	Biosynthetic process
OS06T0182300-01	4530.OS06T0182300-01	GO Process	GO:0009059	Macromolecule biosynthetic process
OS06T0182300-01	4530.OS06T0182300-01	GO Process	GO:0009250	Glucan biosynthetic process
OS06T0182300-01	4530.OS06T0182300-01	GO Process	GO:0009555	Pollen development
OS06T0182300-01	4530.OS06T0182300-01	GO Process	GO:0009556	Microsporogenesis
OS06T0182300-01	4530.OS06T0182300-01	GO Process	GO:0009653	Anatomical structure morphogenesis
OS06T0182300-01	4530.OS06T0182300-01	GO Process	GO:0009826	Unidimensional cell growth
OS06T0182300-01	4530.OS06T0182300-01	GO Process	GO:0009846	Pollen germination
OS06T0182300-01	4530.OS06T0182300-01	GO Process	GO:0009856	Pollination
OS06T0182300-01	4530.OS06T0182300-01	GO Process	GO:0009860	Pollen tube growth
OS06T0182300-01	4530.OS06T0182300-01	GO Process	GO:0009932	Cell tip growth
OS06T0182300-01	4530.OS06T0182300-01	GO Process	GO:0009987	Cellular process
OS06T0182300-01	4530.OS06T0182300-01	GO Process	GO:0010208	Pollen wall assembly
OS06T0182300-01	4530.OS06T0182300-01	GO Process	GO:0010769	Regulation of cell morphogenesis involved in differentiation
OS06T0182300-01	4530.OS06T0182300-01	GO Process	GO:0010927	Cellular component assembly involved in morphogenesis
OS06T0182300-01	4530.OS06T0182300-01	GO Process	GO:0016043	Cellular component organization
OS06T0182300-01	4530.OS06T0182300-01	GO Process	GO:0016049	Cell growth
OS06T0182300-01	4530.OS06T0182300-01	GO Process	GO:0016051	Carbohydrate biosynthetic process
OS06T0182300-01	4530.OS06T0182300-01	GO Process	GO:0019953	Sexual reproduction
OS06T0182300-01	4530.OS06T0182300-01	GO Process	GO:0022402	Cell cycle process
OS06T0182300-01	4530.OS06T0182300-01	GO Process	GO:0022414	Reproductive process
OS06T0182300-01	4530.OS06T0182300-01	GO Process	GO:0022603	Regulation of anatomical structure morphogenesis
OS06T0182300-01	4530.OS06T0182300-01	GO Process	GO:0022604	Regulation of cell morphogenesis
OS06T0182300-01	4530.OS06T0182300-01	GO Process	GO:0022607	Cellular component assembly
OS06T0182300-01	4530.OS06T0182300-01	GO Process	GO:0030154	Cell differentiation
OS06T0182300-01	4530.OS06T0182300-01	GO Process	GO:0032501	Multicellular organismal process
OS06T0182300-01	4530.OS06T0182300-01	GO Process	GO:0032502	Developmental process
OS06T0182300-01	4530.OS06T0182300-01	GO Process	GO:0032989	Cellular component morphogenesis
OS06T0182300-01	4530.OS06T0182300-01	GO Process	GO:0033692	Cellular polysaccharide biosynthetic process
OS06T0182300-01	4530.OS06T0182300-01	GO Process	GO:0034293	Sexual sporulation
OS06T0182300-01	4530.OS06T0182300-01	GO Process	GO:0034637	Cellular carbohydrate biosynthetic process
OS06T0182300-01	4530.OS06T0182300-01	GO Process	GO:0034645	Cellular macromolecule biosynthetic process
OS06T0182300-01	4530.OS06T0182300-01	GO Process	GO:0040007	Growth
OS06T0182300-01	4530.OS06T0182300-01	GO Process	GO:0040008	Regulation of growth
OS06T0182300-01	4530.OS06T0182300-01	GO Process	GO:0043170	Macromolecule metabolic process
OS06T0182300-01	4530.OS06T0182300-01	GO Process	GO:0043900	Regulation of multi-organism process
OS06T0182300-01	4530.OS06T0182300-01	GO Process	GO:0043934	Sporulation
OS06T0182300-01	4530.OS06T0182300-01	GO Process	GO:0044042	Glucan metabolic process
OS06T0182300-01	4530.OS06T0182300-01	GO Process	GO:0044085	Cellular component biogenesis
OS06T0182300-01	4530.OS06T0182300-01	GO Process	GO:0044237	Cellular metabolic process
OS06T0182300-01	4530.OS06T0182300-01	GO Process	GO:0044238	Primary metabolic process
OS06T0182300-01	4530.OS06T0182300-01	GO Process	GO:0044249	Cellular biosynthetic process
OS06T0182300-01	4530.OS06T0182300-01	GO Process	GO:0044260	Cellular macromolecule metabolic process
OS06T0182300-01	4530.OS06T0182300-01	GO Process	GO:0044262	Cellular carbohydrate metabolic process
OS06T0182300-01	4530.OS06T0182300-01	GO Process	GO:0044264	Cellular polysaccharide metabolic process
OS06T0182300-01	4530.OS06T0182300-01	GO Process	GO:0044703	Multi-organism reproductive process
OS06T0182300-01	4530.OS06T0182300-01	GO Process	GO:0044706	Multi-multicellular organism process
OS06T0182300-01	4530.OS06T0182300-01	GO Process	GO:0045229	External encapsulating structure organization
OS06T0182300-01	4530.OS06T0182300-01	GO Process	GO:0045595	Regulation of cell differentiation
OS06T0182300-01	4530.OS06T0182300-01	GO Process	GO:0048229	Gametophyte development
OS06T0182300-01	4530.OS06T0182300-01	GO Process	GO:0048236	Plant-type sporogenesis
OS06T0182300-01	4530.OS06T0182300-01	GO Process	GO:0048468	Cell development
OS06T0182300-01	4530.OS06T0182300-01	GO Process	GO:0048588	Developmental cell growth
OS06T0182300-01	4530.OS06T0182300-01	GO Process	GO:0048589	Developmental growth
OS06T0182300-01	4530.OS06T0182300-01	GO Process	GO:0048638	Regulation of developmental growth
OS06T0182300-01	4530.OS06T0182300-01	GO Process	GO:0048646	Anatomical structure formation involved in morphogenesis
OS06T0182300-01	4530.OS06T0182300-01	GO Process	GO:0048856	Anatomical structure development
OS06T0182300-01	4530.OS06T0182300-01	GO Process	GO:0048868	Pollen tube development
OS06T0182300-01	4530.OS06T0182300-01	GO Process	GO:0048869	Cellular developmental process
OS06T0182300-01	4530.OS06T0182300-01	GO Process	GO:0050789	Regulation of biological process
OS06T0182300-01	4530.OS06T0182300-01	GO Process	GO:0050793	Regulation of developmental process
OS06T0182300-01	4530.OS06T0182300-01	GO Process	GO:0050794	Regulation of cellular process
OS06T0182300-01	4530.OS06T0182300-01	GO Process	GO:0051128	Regulation of cellular component organization
OS06T0182300-01	4530.OS06T0182300-01	GO Process	GO:0051239	Regulation of multicellular organismal process
OS06T0182300-01	4530.OS06T0182300-01	GO Process	GO:0051273	Beta-glucan metabolic process
OS06T0182300-01	4530.OS06T0182300-01	GO Process	GO:0051274	Beta-glucan biosynthetic process
OS06T0182300-01	4530.OS06T0182300-01	GO Process	GO:0051321	Meiotic cell cycle
OS06T0182300-01	4530.OS06T0182300-01	GO Process	GO:0051510	Regulation of unidimensional cell growth
OS06T0182300-01	4530.OS06T0182300-01	GO Process	GO:0051704	Multi-organism process
OS06T0182300-01	4530.OS06T0182300-01	GO Process	GO:0060284	Regulation of cell development
OS06T0182300-01	4530.OS06T0182300-01	GO Process	GO:0060560	Developmental growth involved in morphogenesis
OS06T0182300-01	4530.OS06T0182300-01	GO Process	GO:0065007	Biological regulation
OS06T0182300-01	4530.OS06T0182300-01	GO Process	GO:0065008	Regulation of biological quality
OS06T0182300-01	4530.OS06T0182300-01	GO Process	GO:0071554	Cell wall organization or biogenesis
OS06T0182300-01	4530.OS06T0182300-01	GO Process	GO:0071555	Cell wall organization
OS06T0182300-01	4530.OS06T0182300-01	GO Process	GO:0071704	Organic substance metabolic process
OS06T0182300-01	4530.OS06T0182300-01	GO Process	GO:0071840	Cellular component organization or biogenesis
OS06T0182300-01	4530.OS06T0182300-01	GO Process	GO:0080092	Regulation of pollen tube growth
OS06T0182300-01	4530.OS06T0182300-01	GO Process	GO:1901576	Organic substance biosynthetic process
OS06T0182300-01	4530.OS06T0182300-01	GO Process	GO:1903046	Meiotic cell cycle process
OS06T0182300-01	4530.OS06T0182300-01	GO Process	GO:2000241	Regulation of reproductive process
OS06T0182300-01	4530.OS06T0182300-01	GO Function	GO:0003824	Catalytic activity
OS06T0182300-01	4530.OS06T0182300-01	GO Function	GO:0003843	1,3-beta-D-glucan synthase activity
OS06T0182300-01	4530.OS06T0182300-01	GO Function	GO:0008194	UDP-glycosyltransferase activity
OS06T0182300-01	4530.OS06T0182300-01	GO Function	GO:0016740	Transferase activity
OS06T0182300-01	4530.OS06T0182300-01	GO Function	GO:0016757	Transferase activity, transferring glycosyl groups
OS06T0182300-01	4530.OS06T0182300-01	GO Function	GO:0016758	Transferase activity, transferring hexosyl groups
OS06T0182300-01	4530.OS06T0182300-01	GO Function	GO:0035251	UDP-glucosyltransferase activity
OS06T0182300-01	4530.OS06T0182300-01	GO Function	GO:0046527	Glucosyltransferase activity
OS06T0182300-01	4530.OS06T0182300-01	GO Component	GO:0000148	1,3-beta-D-glucan synthase complex
OS06T0182300-01	4530.OS06T0182300-01	GO Component	GO:0005886	Plasma membrane
OS06T0182300-01	4530.OS06T0182300-01	GO Component	GO:0016020	Membrane
OS06T0182300-01	4530.OS06T0182300-01	GO Component	GO:0016021	Integral component of membrane
OS06T0182300-01	4530.OS06T0182300-01	GO Component	GO:0031224	Intrinsic component of membrane
OS06T0182300-01	4530.OS06T0182300-01	GO Component	GO:0032991	Protein-containing complex
OS06T0182300-01	4530.OS06T0182300-01	GO Component	GO:0071944	Cell periphery
OS06T0182300-01	4530.OS06T0182300-01	GO Component	GO:0098796	Membrane protein complex
OS06T0182300-01	4530.OS06T0182300-01	GO Component	GO:0098797	Plasma membrane protein complex
OS06T0182300-01	4530.OS06T0182300-01	GO Component	GO:0110165	Cellular anatomical entity
OS06T0182300-01	4530.OS06T0182300-01	GO Component	GO:1902494	Catalytic complex
OS06T0182300-01	4530.OS06T0182300-01	GO Component	GO:1990234	Transferase complex
OS06T0182300-01	4530.OS06T0182300-01	STRING clusters	CL:33915	Mostly uncharacterized, incl. pollen wall assembly, and anther wall tapetum development
OS06T0182300-01	4530.OS06T0182300-01	STRING clusters	CL:33916	Mostly uncharacterized, incl. pollen wall assembly, and anther wall tapetum development
OS06T0182300-01	4530.OS06T0182300-01	STRING clusters	CL:33918	Mixed, incl. anther wall tapetum development, and pollen wall assembly
OS06T0182300-01	4530.OS06T0182300-01	STRING clusters	CL:33919	Mixed, incl. pollen wall assembly, and anther wall tapetum development
OS06T0182300-01	4530.OS06T0182300-01	STRING clusters	CL:33921	Mixed, incl. sporopollenin biosynthetic process, and microsporogenesis
OS06T0182300-01	4530.OS06T0182300-01	STRING clusters	CL:33945	Anther wall tapetum cell fate specification, and 1,3-beta-glucan synthase component
OS06T0182300-01	4530.OS06T0182300-01	COMPARTMENTS	GOCC:0005886	Plasma membrane
OS06T0182300-01	4530.OS06T0182300-01	COMPARTMENTS	GOCC:0016020	Membrane
OS06T0182300-01	4530.OS06T0182300-01	COMPARTMENTS	GOCC:0071944	Cell periphery
OS06T0182300-01	4530.OS06T0182300-01	COMPARTMENTS	GOCC:0110165	Cellular anatomical entity
OS06T0182300-01	4530.OS06T0182300-01	Pfam	PF02364	1,3-beta-glucan synthase component
OS06T0182300-01	4530.OS06T0182300-01	InterPro	IPR003440	Glycosyl transferase, family 48
Os2R_MYB1	4530.OS01T0128000-01	GO Process	GO:0006355	Regulation of transcription, dna-templated
Os2R_MYB1	4530.OS01T0128000-01	GO Process	GO:0007154	Cell communication
Os2R_MYB1	4530.OS01T0128000-01	GO Process	GO:0007165	Signal transduction
Os2R_MYB1	4530.OS01T0128000-01	GO Process	GO:0007275	Multicellular organism development
Os2R_MYB1	4530.OS01T0128000-01	GO Process	GO:0009605	Response to external stimulus
Os2R_MYB1	4530.OS01T0128000-01	GO Process	GO:0009719	Response to endogenous stimulus
Os2R_MYB1	4530.OS01T0128000-01	GO Process	GO:0009725	Response to hormone
Os2R_MYB1	4530.OS01T0128000-01	GO Process	GO:0009739	Response to gibberellin
Os2R_MYB1	4530.OS01T0128000-01	GO Process	GO:0009740	Gibberellic acid mediated signaling pathway
Os2R_MYB1	4530.OS01T0128000-01	GO Process	GO:0009755	Hormone-mediated signaling pathway
Os2R_MYB1	4530.OS01T0128000-01	GO Process	GO:0009889	Regulation of biosynthetic process
Os2R_MYB1	4530.OS01T0128000-01	GO Process	GO:0009987	Cellular process
Os2R_MYB1	4530.OS01T0128000-01	GO Process	GO:0010033	Response to organic substance
Os2R_MYB1	4530.OS01T0128000-01	GO Process	GO:0010468	Regulation of gene expression
Os2R_MYB1	4530.OS01T0128000-01	GO Process	GO:0010476	Gibberellin mediated signaling pathway
Os2R_MYB1	4530.OS01T0128000-01	GO Process	GO:0010556	Regulation of macromolecule biosynthetic process
Os2R_MYB1	4530.OS01T0128000-01	GO Process	GO:0019219	Regulation of nucleobase-containing compound metabolic process
Os2R_MYB1	4530.OS01T0128000-01	GO Process	GO:0019222	Regulation of metabolic process
Os2R_MYB1	4530.OS01T0128000-01	GO Process	GO:0023052	Signaling
Os2R_MYB1	4530.OS01T0128000-01	GO Process	GO:0031323	Regulation of cellular metabolic process
Os2R_MYB1	4530.OS01T0128000-01	GO Process	GO:0031326	Regulation of cellular biosynthetic process
Os2R_MYB1	4530.OS01T0128000-01	GO Process	GO:0032501	Multicellular organismal process
Os2R_MYB1	4530.OS01T0128000-01	GO Process	GO:0032502	Developmental process
Os2R_MYB1	4530.OS01T0128000-01	GO Process	GO:0032870	Cellular response to hormone stimulus
Os2R_MYB1	4530.OS01T0128000-01	GO Process	GO:0033993	Response to lipid
Os2R_MYB1	4530.OS01T0128000-01	GO Process	GO:0042221	Response to chemical
Os2R_MYB1	4530.OS01T0128000-01	GO Process	GO:0048731	System development
Os2R_MYB1	4530.OS01T0128000-01	GO Process	GO:0048856	Anatomical structure development
Os2R_MYB1	4530.OS01T0128000-01	GO Process	GO:0050789	Regulation of biological process
Os2R_MYB1	4530.OS01T0128000-01	GO Process	GO:0050794	Regulation of cellular process
Os2R_MYB1	4530.OS01T0128000-01	GO Process	GO:0050896	Response to stimulus
Os2R_MYB1	4530.OS01T0128000-01	GO Process	GO:0051171	Regulation of nitrogen compound metabolic process
Os2R_MYB1	4530.OS01T0128000-01	GO Process	GO:0051252	Regulation of rna metabolic process
Os2R_MYB1	4530.OS01T0128000-01	GO Process	GO:0051716	Cellular response to stimulus
Os2R_MYB1	4530.OS01T0128000-01	GO Process	GO:0060255	Regulation of macromolecule metabolic process
Os2R_MYB1	4530.OS01T0128000-01	GO Process	GO:0065007	Biological regulation
Os2R_MYB1	4530.OS01T0128000-01	GO Process	GO:0070887	Cellular response to chemical stimulus
Os2R_MYB1	4530.OS01T0128000-01	GO Process	GO:0071310	Cellular response to organic substance
Os2R_MYB1	4530.OS01T0128000-01	GO Process	GO:0071370	Cellular response to gibberellin stimulus
Os2R_MYB1	4530.OS01T0128000-01	GO Process	GO:0071396	Cellular response to lipid
Os2R_MYB1	4530.OS01T0128000-01	GO Process	GO:0071495	Cellular response to endogenous stimulus
Os2R_MYB1	4530.OS01T0128000-01	GO Process	GO:0080090	Regulation of primary metabolic process
Os2R_MYB1	4530.OS01T0128000-01	GO Process	GO:0099402	Plant organ development
Os2R_MYB1	4530.OS01T0128000-01	GO Process	GO:1901700	Response to oxygen-containing compound
Os2R_MYB1	4530.OS01T0128000-01	GO Process	GO:1901701	Cellular response to oxygen-containing compound
Os2R_MYB1	4530.OS01T0128000-01	GO Process	GO:1903506	Regulation of nucleic acid-templated transcription
Os2R_MYB1	4530.OS01T0128000-01	GO Process	GO:2000112	Regulation of cellular macromolecule biosynthetic process
Os2R_MYB1	4530.OS01T0128000-01	GO Process	GO:2001141	Regulation of rna biosynthetic process
Os2R_MYB1	4530.OS01T0128000-01	GO Function	GO:0003676	Nucleic acid binding
Os2R_MYB1	4530.OS01T0128000-01	GO Function	GO:0003677	DNA binding
Os2R_MYB1	4530.OS01T0128000-01	GO Function	GO:0005488	Binding
Os2R_MYB1	4530.OS01T0128000-01	GO Function	GO:0043565	Sequence-specific dna binding
Os2R_MYB1	4530.OS01T0128000-01	GO Function	GO:0097159	Organic cyclic compound binding
Os2R_MYB1	4530.OS01T0128000-01	GO Function	GO:1901363	Heterocyclic compound binding
Os2R_MYB1	4530.OS01T0128000-01	GO Component	GO:0005622	Intracellular
Os2R_MYB1	4530.OS01T0128000-01	GO Component	GO:0005634	Nucleus
Os2R_MYB1	4530.OS01T0128000-01	GO Component	GO:0043226	Organelle
Os2R_MYB1	4530.OS01T0128000-01	GO Component	GO:0043227	Membrane-bounded organelle
Os2R_MYB1	4530.OS01T0128000-01	GO Component	GO:0043229	Intracellular organelle
Os2R_MYB1	4530.OS01T0128000-01	GO Component	GO:0043231	Intracellular membrane-bounded organelle
Os2R_MYB1	4530.OS01T0128000-01	GO Component	GO:0110165	Cellular anatomical entity
Os2R_MYB1	4530.OS01T0128000-01	STRING clusters	CL:31057	Mixed, incl. jasmonic acid signaling pathway, and stress response
Os2R_MYB1	4530.OS01T0128000-01	STRING clusters	CL:31058	Mixed, incl. jasmonic acid signaling pathway, and stress response
Os2R_MYB1	4530.OS01T0128000-01	STRING clusters	CL:31320	Mostly uncharacterized, incl. acetyltransferase (gnat) domain, and atrichoblast differentiation
Os2R_MYB1	4530.OS01T0128000-01	COMPARTMENTS	GOCC:0005622	Intracellular
Os2R_MYB1	4530.OS01T0128000-01	COMPARTMENTS	GOCC:0005634	Nucleus
Os2R_MYB1	4530.OS01T0128000-01	COMPARTMENTS	GOCC:0043226	Organelle
Os2R_MYB1	4530.OS01T0128000-01	COMPARTMENTS	GOCC:0043227	Membrane-bounded organelle
Os2R_MYB1	4530.OS01T0128000-01	COMPARTMENTS	GOCC:0043229	Intracellular organelle
Os2R_MYB1	4530.OS01T0128000-01	COMPARTMENTS	GOCC:0043231	Intracellular membrane-bounded organelle
Os2R_MYB1	4530.OS01T0128000-01	COMPARTMENTS	GOCC:0110165	Cellular anatomical entity
Os2R_MYB1	4530.OS01T0128000-01	Pfam	PF00249	Myb-like DNA-binding domain
Os2R_MYB1	4530.OS01T0128000-01	Pfam	PF13921	Myb-like DNA-binding domain
Os2R_MYB1	4530.OS01T0128000-01	InterPro	IPR001005	SANT/Myb domain
Os2R_MYB1	4530.OS01T0128000-01	InterPro	IPR009057	Homeobox-like domain superfamily
Os2R_MYB1	4530.OS01T0128000-01	InterPro	IPR017930	Myb domain
Os2R_MYB1	4530.OS01T0128000-01	SMART	SM00717	SANT SWI3, ADA2, N-CoR and TFIIIB DNA-binding domains
Os2R_MYB11	4530.OS01T0695900-01	GO Process	GO:0000003	Reproduction
Os2R_MYB11	4530.OS01T0695900-01	GO Process	GO:0000902	Cell morphogenesis
Os2R_MYB11	4530.OS01T0695900-01	GO Process	GO:0000904	Cell morphogenesis involved in differentiation
Os2R_MYB11	4530.OS01T0695900-01	GO Process	GO:0003006	Developmental process involved in reproduction
Os2R_MYB11	4530.OS01T0695900-01	GO Process	GO:0006355	Regulation of transcription, dna-templated
Os2R_MYB11	4530.OS01T0695900-01	GO Process	GO:0007275	Multicellular organism development
Os2R_MYB11	4530.OS01T0695900-01	GO Process	GO:0008152	Metabolic process
Os2R_MYB11	4530.OS01T0695900-01	GO Process	GO:0009058	Biosynthetic process
Os2R_MYB11	4530.OS01T0695900-01	GO Process	GO:0009653	Anatomical structure morphogenesis
Os2R_MYB11	4530.OS01T0695900-01	GO Process	GO:0009791	Post-embryonic development
Os2R_MYB11	4530.OS01T0695900-01	GO Process	GO:0009888	Tissue development
Os2R_MYB11	4530.OS01T0695900-01	GO Process	GO:0009889	Regulation of biosynthetic process
Os2R_MYB11	4530.OS01T0695900-01	GO Process	GO:0009987	Cellular process
Os2R_MYB11	4530.OS01T0695900-01	GO Process	GO:0010026	Trichome differentiation
Os2R_MYB11	4530.OS01T0695900-01	GO Process	GO:0010090	Trichome morphogenesis
Os2R_MYB11	4530.OS01T0695900-01	GO Process	GO:0010154	Fruit development
Os2R_MYB11	4530.OS01T0695900-01	GO Process	GO:0010191	Mucilage metabolic process
Os2R_MYB11	4530.OS01T0695900-01	GO Process	GO:0010192	Mucilage biosynthetic process
Os2R_MYB11	4530.OS01T0695900-01	GO Process	GO:0010214	Seed coat development
Os2R_MYB11	4530.OS01T0695900-01	GO Process	GO:0010468	Regulation of gene expression
Os2R_MYB11	4530.OS01T0695900-01	GO Process	GO:0010556	Regulation of macromolecule biosynthetic process
Os2R_MYB11	4530.OS01T0695900-01	GO Process	GO:0019219	Regulation of nucleobase-containing compound metabolic process
Os2R_MYB11	4530.OS01T0695900-01	GO Process	GO:0019222	Regulation of metabolic process
Os2R_MYB11	4530.OS01T0695900-01	GO Process	GO:0022414	Reproductive process
Os2R_MYB11	4530.OS01T0695900-01	GO Process	GO:0030154	Cell differentiation
Os2R_MYB11	4530.OS01T0695900-01	GO Process	GO:0031323	Regulation of cellular metabolic process
Os2R_MYB11	4530.OS01T0695900-01	GO Process	GO:0031326	Regulation of cellular biosynthetic process
Os2R_MYB11	4530.OS01T0695900-01	GO Process	GO:0032501	Multicellular organismal process
Os2R_MYB11	4530.OS01T0695900-01	GO Process	GO:0032502	Developmental process
Os2R_MYB11	4530.OS01T0695900-01	GO Process	GO:0044237	Cellular metabolic process
Os2R_MYB11	4530.OS01T0695900-01	GO Process	GO:0044249	Cellular biosynthetic process
Os2R_MYB11	4530.OS01T0695900-01	GO Process	GO:0048316	Seed development
Os2R_MYB11	4530.OS01T0695900-01	GO Process	GO:0048354	Mucilage biosynthetic process involved in seed coat development
Os2R_MYB11	4530.OS01T0695900-01	GO Process	GO:0048359	Mucilage metabolic process involved in seed coat development
Os2R_MYB11	4530.OS01T0695900-01	GO Process	GO:0048468	Cell development
Os2R_MYB11	4530.OS01T0695900-01	GO Process	GO:0048608	Reproductive structure development
Os2R_MYB11	4530.OS01T0695900-01	GO Process	GO:0048731	System development
Os2R_MYB11	4530.OS01T0695900-01	GO Process	GO:0048856	Anatomical structure development
Os2R_MYB11	4530.OS01T0695900-01	GO Process	GO:0048869	Cellular developmental process
Os2R_MYB11	4530.OS01T0695900-01	GO Process	GO:0050789	Regulation of biological process
Os2R_MYB11	4530.OS01T0695900-01	GO Process	GO:0050794	Regulation of cellular process
Os2R_MYB11	4530.OS01T0695900-01	GO Process	GO:0051171	Regulation of nitrogen compound metabolic process
Os2R_MYB11	4530.OS01T0695900-01	GO Process	GO:0051252	Regulation of rna metabolic process
Os2R_MYB11	4530.OS01T0695900-01	GO Process	GO:0060255	Regulation of macromolecule metabolic process
Os2R_MYB11	4530.OS01T0695900-01	GO Process	GO:0061458	Reproductive system development
Os2R_MYB11	4530.OS01T0695900-01	GO Process	GO:0065007	Biological regulation
Os2R_MYB11	4530.OS01T0695900-01	GO Process	GO:0065009	Regulation of molecular function
Os2R_MYB11	4530.OS01T0695900-01	GO Process	GO:0080090	Regulation of primary metabolic process
Os2R_MYB11	4530.OS01T0695900-01	GO Process	GO:0090558	Plant epidermis development
Os2R_MYB11	4530.OS01T0695900-01	GO Process	GO:0090626	Plant epidermis morphogenesis
Os2R_MYB11	4530.OS01T0695900-01	GO Process	GO:1903506	Regulation of nucleic acid-templated transcription
Os2R_MYB11	4530.OS01T0695900-01	GO Process	GO:2000112	Regulation of cellular macromolecule biosynthetic process
Os2R_MYB11	4530.OS01T0695900-01	GO Process	GO:2001141	Regulation of rna biosynthetic process
Os2R_MYB11	4530.OS01T0695900-01	GO Function	GO:0000976	Transcription regulatory region sequence-specific dna binding
Os2R_MYB11	4530.OS01T0695900-01	GO Function	GO:0001067	Regulatory region nucleic acid binding
Os2R_MYB11	4530.OS01T0695900-01	GO Function	GO:0003676	Nucleic acid binding
Os2R_MYB11	4530.OS01T0695900-01	GO Function	GO:0003677	DNA binding
Os2R_MYB11	4530.OS01T0695900-01	GO Function	GO:0003690	Double-stranded dna binding
Os2R_MYB11	4530.OS01T0695900-01	GO Function	GO:0003700	DNA-binding transcription factor activity
Os2R_MYB11	4530.OS01T0695900-01	GO Function	GO:0005488	Binding
Os2R_MYB11	4530.OS01T0695900-01	GO Function	GO:0043565	Sequence-specific dna binding
Os2R_MYB11	4530.OS01T0695900-01	GO Function	GO:0097159	Organic cyclic compound binding
Os2R_MYB11	4530.OS01T0695900-01	GO Function	GO:0098772	Molecular function regulator
Os2R_MYB11	4530.OS01T0695900-01	GO Function	GO:0140110	Transcription regulator activity
Os2R_MYB11	4530.OS01T0695900-01	GO Function	GO:1901363	Heterocyclic compound binding
Os2R_MYB11	4530.OS01T0695900-01	GO Function	GO:1990837	Sequence-specific double-stranded dna binding
Os2R_MYB11	4530.OS01T0695900-01	GO Component	GO:0005622	Intracellular
Os2R_MYB11	4530.OS01T0695900-01	GO Component	GO:0005634	Nucleus
Os2R_MYB11	4530.OS01T0695900-01	GO Component	GO:0043226	Organelle
Os2R_MYB11	4530.OS01T0695900-01	GO Component	GO:0043227	Membrane-bounded organelle
Os2R_MYB11	4530.OS01T0695900-01	GO Component	GO:0043229	Intracellular organelle
Os2R_MYB11	4530.OS01T0695900-01	GO Component	GO:0043231	Intracellular membrane-bounded organelle
Os2R_MYB11	4530.OS01T0695900-01	GO Component	GO:0110165	Cellular anatomical entity
Os2R_MYB11	4530.OS01T0695900-01	STRING clusters	CL:33314	Mixed, incl. flavonoid biosynthesis, and phenylpropanoid metabolic process
Os2R_MYB11	4530.OS01T0695900-01	STRING clusters	CL:33658	Mixed, incl. epidermal cell fate specification, and cell cortex of cell tip
Os2R_MYB11	4530.OS01T0695900-01	STRING clusters	CL:33685	Mixed, incl. epidermal cell fate specification, and cell cortex of cell tip
Os2R_MYB11	4530.OS01T0695900-01	COMPARTMENTS	GOCC:0005622	Intracellular
Os2R_MYB11	4530.OS01T0695900-01	COMPARTMENTS	GOCC:0005634	Nucleus
Os2R_MYB11	4530.OS01T0695900-01	COMPARTMENTS	GOCC:0043226	Organelle
Os2R_MYB11	4530.OS01T0695900-01	COMPARTMENTS	GOCC:0043227	Membrane-bounded organelle
Os2R_MYB11	4530.OS01T0695900-01	COMPARTMENTS	GOCC:0043229	Intracellular organelle
Os2R_MYB11	4530.OS01T0695900-01	COMPARTMENTS	GOCC:0043231	Intracellular membrane-bounded organelle
Os2R_MYB11	4530.OS01T0695900-01	COMPARTMENTS	GOCC:0110165	Cellular anatomical entity
Os2R_MYB11	4530.OS01T0695900-01	UniProt Keywords	KW-0238	DNA-binding
Os2R_MYB11	4530.OS01T0695900-01	UniProt Keywords	KW-0539	Nucleus
Os2R_MYB11	4530.OS01T0695900-01	UniProt Keywords	KW-0804	Transcription
Os2R_MYB11	4530.OS01T0695900-01	UniProt Keywords	KW-0805	Transcription regulation
Os2R_MYB11	4530.OS01T0695900-01	Pfam	PF00249	Myb-like DNA-binding domain
Os2R_MYB11	4530.OS01T0695900-01	Pfam	PF13921	Myb-like DNA-binding domain
Os2R_MYB11	4530.OS01T0695900-01	InterPro	IPR001005	SANT/Myb domain
Os2R_MYB11	4530.OS01T0695900-01	InterPro	IPR009057	Homeobox-like domain superfamily
Os2R_MYB11	4530.OS01T0695900-01	InterPro	IPR017930	Myb domain
Os2R_MYB11	4530.OS01T0695900-01	SMART	SM00717	SANT SWI3, ADA2, N-CoR and TFIIIB DNA-binding domains
Os2R_MYB12	4530.OS01T0702700-01	GO Process	GO:0006355	Regulation of transcription, dna-templated
Os2R_MYB12	4530.OS01T0702700-01	GO Process	GO:0009889	Regulation of biosynthetic process
Os2R_MYB12	4530.OS01T0702700-01	GO Process	GO:0009987	Cellular process
Os2R_MYB12	4530.OS01T0702700-01	GO Process	GO:0010119	Regulation of stomatal movement
Os2R_MYB12	4530.OS01T0702700-01	GO Process	GO:0010468	Regulation of gene expression
Os2R_MYB12	4530.OS01T0702700-01	GO Process	GO:0010556	Regulation of macromolecule biosynthetic process
Os2R_MYB12	4530.OS01T0702700-01	GO Process	GO:0019219	Regulation of nucleobase-containing compound metabolic process
Os2R_MYB12	4530.OS01T0702700-01	GO Process	GO:0019222	Regulation of metabolic process
Os2R_MYB12	4530.OS01T0702700-01	GO Process	GO:0030154	Cell differentiation
Os2R_MYB12	4530.OS01T0702700-01	GO Process	GO:0031323	Regulation of cellular metabolic process
Os2R_MYB12	4530.OS01T0702700-01	GO Process	GO:0031326	Regulation of cellular biosynthetic process
Os2R_MYB12	4530.OS01T0702700-01	GO Process	GO:0032502	Developmental process
Os2R_MYB12	4530.OS01T0702700-01	GO Process	GO:0048869	Cellular developmental process
Os2R_MYB12	4530.OS01T0702700-01	GO Process	GO:0050789	Regulation of biological process
Os2R_MYB12	4530.OS01T0702700-01	GO Process	GO:0050794	Regulation of cellular process
Os2R_MYB12	4530.OS01T0702700-01	GO Process	GO:0051171	Regulation of nitrogen compound metabolic process
Os2R_MYB12	4530.OS01T0702700-01	GO Process	GO:0051252	Regulation of rna metabolic process
Os2R_MYB12	4530.OS01T0702700-01	GO Process	GO:0060255	Regulation of macromolecule metabolic process
Os2R_MYB12	4530.OS01T0702700-01	GO Process	GO:0065007	Biological regulation
Os2R_MYB12	4530.OS01T0702700-01	GO Process	GO:0065009	Regulation of molecular function
Os2R_MYB12	4530.OS01T0702700-01	GO Process	GO:0080090	Regulation of primary metabolic process
Os2R_MYB12	4530.OS01T0702700-01	GO Process	GO:1903506	Regulation of nucleic acid-templated transcription
Os2R_MYB12	4530.OS01T0702700-01	GO Process	GO:2000112	Regulation of cellular macromolecule biosynthetic process
Os2R_MYB12	4530.OS01T0702700-01	GO Process	GO:2001141	Regulation of rna biosynthetic process
Os2R_MYB12	4530.OS01T0702700-01	GO Function	GO:0000976	Transcription regulatory region sequence-specific dna binding
Os2R_MYB12	4530.OS01T0702700-01	GO Function	GO:0001067	Regulatory region nucleic acid binding
Os2R_MYB12	4530.OS01T0702700-01	GO Function	GO:0003676	Nucleic acid binding
Os2R_MYB12	4530.OS01T0702700-01	GO Function	GO:0003677	DNA binding
Os2R_MYB12	4530.OS01T0702700-01	GO Function	GO:0003690	Double-stranded dna binding
Os2R_MYB12	4530.OS01T0702700-01	GO Function	GO:0003700	DNA-binding transcription factor activity
Os2R_MYB12	4530.OS01T0702700-01	GO Function	GO:0005488	Binding
Os2R_MYB12	4530.OS01T0702700-01	GO Function	GO:0043565	Sequence-specific dna binding
Os2R_MYB12	4530.OS01T0702700-01	GO Function	GO:0097159	Organic cyclic compound binding
Os2R_MYB12	4530.OS01T0702700-01	GO Function	GO:0098772	Molecular function regulator
Os2R_MYB12	4530.OS01T0702700-01	GO Function	GO:0140110	Transcription regulator activity
Os2R_MYB12	4530.OS01T0702700-01	GO Function	GO:1901363	Heterocyclic compound binding
Os2R_MYB12	4530.OS01T0702700-01	GO Function	GO:1990837	Sequence-specific double-stranded dna binding
Os2R_MYB12	4530.OS01T0702700-01	GO Component	GO:0005622	Intracellular
Os2R_MYB12	4530.OS01T0702700-01	GO Component	GO:0005634	Nucleus
Os2R_MYB12	4530.OS01T0702700-01	GO Component	GO:0043226	Organelle
Os2R_MYB12	4530.OS01T0702700-01	GO Component	GO:0043227	Membrane-bounded organelle
Os2R_MYB12	4530.OS01T0702700-01	GO Component	GO:0043229	Intracellular organelle
Os2R_MYB12	4530.OS01T0702700-01	GO Component	GO:0043231	Intracellular membrane-bounded organelle
Os2R_MYB12	4530.OS01T0702700-01	GO Component	GO:0110165	Cellular anatomical entity
Os2R_MYB12	4530.OS01T0702700-01	STRING clusters	CL:30342	Mostly uncharacterized, incl. protein of unknown function (duf1677), and domain of unknown function duf632
Os2R_MYB12	4530.OS01T0702700-01	STRING clusters	CL:30343	Mostly uncharacterized, incl. domain of unknown function duf632, and tub family
Os2R_MYB12	4530.OS01T0702700-01	STRING clusters	CL:30344	Mixed, incl. domain of unknown function duf632, and tub family
Os2R_MYB12	4530.OS01T0702700-01	STRING clusters	CL:30346	Mixed, incl. domain of unknown function duf632, and pan domain
Os2R_MYB12	4530.OS01T0702700-01	STRING clusters	CL:30349	Mixed, incl. pan domain, and response to lithium ion
Os2R_MYB12	4530.OS01T0702700-01	STRING clusters	CL:30352	Mixed, incl. response to lithium ion, and cytoplasmic dynein complex
Os2R_MYB12	4530.OS01T0702700-01	COMPARTMENTS	GOCC:0005622	Intracellular
Os2R_MYB12	4530.OS01T0702700-01	COMPARTMENTS	GOCC:0005634	Nucleus
Os2R_MYB12	4530.OS01T0702700-01	COMPARTMENTS	GOCC:0043226	Organelle
Os2R_MYB12	4530.OS01T0702700-01	COMPARTMENTS	GOCC:0043227	Membrane-bounded organelle
Os2R_MYB12	4530.OS01T0702700-01	COMPARTMENTS	GOCC:0043229	Intracellular organelle
Os2R_MYB12	4530.OS01T0702700-01	COMPARTMENTS	GOCC:0043231	Intracellular membrane-bounded organelle
Os2R_MYB12	4530.OS01T0702700-01	COMPARTMENTS	GOCC:0110165	Cellular anatomical entity
Os2R_MYB12	4530.OS01T0702700-01	UniProt Keywords	KW-0238	DNA-binding
Os2R_MYB12	4530.OS01T0702700-01	UniProt Keywords	KW-0539	Nucleus
Os2R_MYB12	4530.OS01T0702700-01	UniProt Keywords	KW-0804	Transcription
Os2R_MYB12	4530.OS01T0702700-01	UniProt Keywords	KW-0805	Transcription regulation
Os2R_MYB12	4530.OS01T0702700-01	Pfam	PF00249	Myb-like DNA-binding domain
Os2R_MYB12	4530.OS01T0702700-01	Pfam	PF13921	Myb-like DNA-binding domain
Os2R_MYB12	4530.OS01T0702700-01	InterPro	IPR001005	SANT/Myb domain
Os2R_MYB12	4530.OS01T0702700-01	InterPro	IPR009057	Homeobox-like domain superfamily
Os2R_MYB12	4530.OS01T0702700-01	InterPro	IPR017930	Myb domain
Os2R_MYB12	4530.OS01T0702700-01	SMART	SM00717	SANT SWI3, ADA2, N-CoR and TFIIIB DNA-binding domains
Os2R_MYB13	4530.OS01T0709000-01	GO Process	GO:0006355	Regulation of transcription, dna-templated
Os2R_MYB13	4530.OS01T0709000-01	GO Process	GO:0009889	Regulation of biosynthetic process
Os2R_MYB13	4530.OS01T0709000-01	GO Process	GO:0009987	Cellular process
Os2R_MYB13	4530.OS01T0709000-01	GO Process	GO:0010468	Regulation of gene expression
Os2R_MYB13	4530.OS01T0709000-01	GO Process	GO:0010556	Regulation of macromolecule biosynthetic process
Os2R_MYB13	4530.OS01T0709000-01	GO Process	GO:0019219	Regulation of nucleobase-containing compound metabolic process
Os2R_MYB13	4530.OS01T0709000-01	GO Process	GO:0019222	Regulation of metabolic process
Os2R_MYB13	4530.OS01T0709000-01	GO Process	GO:0030154	Cell differentiation
Os2R_MYB13	4530.OS01T0709000-01	GO Process	GO:0031323	Regulation of cellular metabolic process
Os2R_MYB13	4530.OS01T0709000-01	GO Process	GO:0031326	Regulation of cellular biosynthetic process
Os2R_MYB13	4530.OS01T0709000-01	GO Process	GO:0032502	Developmental process
Os2R_MYB13	4530.OS01T0709000-01	GO Process	GO:0048869	Cellular developmental process
Os2R_MYB13	4530.OS01T0709000-01	GO Process	GO:0050789	Regulation of biological process
Os2R_MYB13	4530.OS01T0709000-01	GO Process	GO:0050794	Regulation of cellular process
Os2R_MYB13	4530.OS01T0709000-01	GO Process	GO:0051171	Regulation of nitrogen compound metabolic process
Os2R_MYB13	4530.OS01T0709000-01	GO Process	GO:0051252	Regulation of rna metabolic process
Os2R_MYB13	4530.OS01T0709000-01	GO Process	GO:0060255	Regulation of macromolecule metabolic process
Os2R_MYB13	4530.OS01T0709000-01	GO Process	GO:0065007	Biological regulation
Os2R_MYB13	4530.OS01T0709000-01	GO Process	GO:0065009	Regulation of molecular function
Os2R_MYB13	4530.OS01T0709000-01	GO Process	GO:0080090	Regulation of primary metabolic process
Os2R_MYB13	4530.OS01T0709000-01	GO Process	GO:1903506	Regulation of nucleic acid-templated transcription
Os2R_MYB13	4530.OS01T0709000-01	GO Process	GO:2000112	Regulation of cellular macromolecule biosynthetic process
Os2R_MYB13	4530.OS01T0709000-01	GO Process	GO:2001141	Regulation of rna biosynthetic process
Os2R_MYB13	4530.OS01T0709000-01	GO Function	GO:0000976	Transcription regulatory region sequence-specific dna binding
Os2R_MYB13	4530.OS01T0709000-01	GO Function	GO:0001067	Regulatory region nucleic acid binding
Os2R_MYB13	4530.OS01T0709000-01	GO Function	GO:0003676	Nucleic acid binding
Os2R_MYB13	4530.OS01T0709000-01	GO Function	GO:0003677	DNA binding
Os2R_MYB13	4530.OS01T0709000-01	GO Function	GO:0003690	Double-stranded dna binding
Os2R_MYB13	4530.OS01T0709000-01	GO Function	GO:0003700	DNA-binding transcription factor activity
Os2R_MYB13	4530.OS01T0709000-01	GO Function	GO:0005488	Binding
Os2R_MYB13	4530.OS01T0709000-01	GO Function	GO:0043565	Sequence-specific dna binding
Os2R_MYB13	4530.OS01T0709000-01	GO Function	GO:0097159	Organic cyclic compound binding
Os2R_MYB13	4530.OS01T0709000-01	GO Function	GO:0098772	Molecular function regulator
Os2R_MYB13	4530.OS01T0709000-01	GO Function	GO:0140110	Transcription regulator activity
Os2R_MYB13	4530.OS01T0709000-01	GO Function	GO:1901363	Heterocyclic compound binding
Os2R_MYB13	4530.OS01T0709000-01	GO Function	GO:1990837	Sequence-specific double-stranded dna binding
Os2R_MYB13	4530.OS01T0709000-01	GO Component	GO:0005622	Intracellular
Os2R_MYB13	4530.OS01T0709000-01	GO Component	GO:0005634	Nucleus
Os2R_MYB13	4530.OS01T0709000-01	GO Component	GO:0043226	Organelle
Os2R_MYB13	4530.OS01T0709000-01	GO Component	GO:0043227	Membrane-bounded organelle
Os2R_MYB13	4530.OS01T0709000-01	GO Component	GO:0043229	Intracellular organelle
Os2R_MYB13	4530.OS01T0709000-01	GO Component	GO:0043231	Intracellular membrane-bounded organelle
Os2R_MYB13	4530.OS01T0709000-01	GO Component	GO:0110165	Cellular anatomical entity
Os2R_MYB13	4530.OS01T0709000-01	STRING clusters	CL:33915	Mostly uncharacterized, incl. pollen wall assembly, and anther wall tapetum development
Os2R_MYB13	4530.OS01T0709000-01	STRING clusters	CL:33916	Mostly uncharacterized, incl. pollen wall assembly, and anther wall tapetum development
Os2R_MYB13	4530.OS01T0709000-01	STRING clusters	CL:33918	Mixed, incl. anther wall tapetum development, and pollen wall assembly
Os2R_MYB13	4530.OS01T0709000-01	STRING clusters	CL:33919	Mixed, incl. pollen wall assembly, and anther wall tapetum development
Os2R_MYB13	4530.OS01T0709000-01	STRING clusters	CL:33921	Mixed, incl. sporopollenin biosynthetic process, and microsporogenesis
Os2R_MYB13	4530.OS01T0709000-01	STRING clusters	CL:33945	Anther wall tapetum cell fate specification, and 1,3-beta-glucan synthase component
Os2R_MYB13	4530.OS01T0709000-01	COMPARTMENTS	GOCC:0005622	Intracellular
Os2R_MYB13	4530.OS01T0709000-01	COMPARTMENTS	GOCC:0005634	Nucleus
Os2R_MYB13	4530.OS01T0709000-01	COMPARTMENTS	GOCC:0043226	Organelle
Os2R_MYB13	4530.OS01T0709000-01	COMPARTMENTS	GOCC:0043227	Membrane-bounded organelle
Os2R_MYB13	4530.OS01T0709000-01	COMPARTMENTS	GOCC:0043229	Intracellular organelle
Os2R_MYB13	4530.OS01T0709000-01	COMPARTMENTS	GOCC:0043231	Intracellular membrane-bounded organelle
Os2R_MYB13	4530.OS01T0709000-01	COMPARTMENTS	GOCC:0110165	Cellular anatomical entity
Os2R_MYB13	4530.OS01T0709000-01	UniProt Keywords	KW-0238	DNA-binding
Os2R_MYB13	4530.OS01T0709000-01	UniProt Keywords	KW-0539	Nucleus
Os2R_MYB13	4530.OS01T0709000-01	UniProt Keywords	KW-0804	Transcription
Os2R_MYB13	4530.OS01T0709000-01	UniProt Keywords	KW-0805	Transcription regulation
Os2R_MYB13	4530.OS01T0709000-01	Pfam	PF00249	Myb-like DNA-binding domain
Os2R_MYB13	4530.OS01T0709000-01	Pfam	PF13921	Myb-like DNA-binding domain
Os2R_MYB13	4530.OS01T0709000-01	InterPro	IPR001005	SANT/Myb domain
Os2R_MYB13	4530.OS01T0709000-01	InterPro	IPR009057	Homeobox-like domain superfamily
Os2R_MYB13	4530.OS01T0709000-01	InterPro	IPR017930	Myb domain
Os2R_MYB13	4530.OS01T0709000-01	SMART	SM00717	SANT SWI3, ADA2, N-CoR and TFIIIB DNA-binding domains
Os2R_MYB14	4530.OS01T0722300-01	GO Process	GO:0006355	Regulation of transcription, dna-templated
Os2R_MYB14	4530.OS01T0722300-01	GO Process	GO:0007275	Multicellular organism development
Os2R_MYB14	4530.OS01T0722300-01	GO Process	GO:0009889	Regulation of biosynthetic process
Os2R_MYB14	4530.OS01T0722300-01	GO Process	GO:0009987	Cellular process
Os2R_MYB14	4530.OS01T0722300-01	GO Process	GO:0010468	Regulation of gene expression
Os2R_MYB14	4530.OS01T0722300-01	GO Process	GO:0010556	Regulation of macromolecule biosynthetic process
Os2R_MYB14	4530.OS01T0722300-01	GO Process	GO:0019219	Regulation of nucleobase-containing compound metabolic process
Os2R_MYB14	4530.OS01T0722300-01	GO Process	GO:0019222	Regulation of metabolic process
Os2R_MYB14	4530.OS01T0722300-01	GO Process	GO:0030154	Cell differentiation
Os2R_MYB14	4530.OS01T0722300-01	GO Process	GO:0031323	Regulation of cellular metabolic process
Os2R_MYB14	4530.OS01T0722300-01	GO Process	GO:0031326	Regulation of cellular biosynthetic process
Os2R_MYB14	4530.OS01T0722300-01	GO Process	GO:0032501	Multicellular organismal process
Os2R_MYB14	4530.OS01T0722300-01	GO Process	GO:0032502	Developmental process
Os2R_MYB14	4530.OS01T0722300-01	GO Process	GO:0048856	Anatomical structure development
Os2R_MYB14	4530.OS01T0722300-01	GO Process	GO:0048869	Cellular developmental process
Os2R_MYB14	4530.OS01T0722300-01	GO Process	GO:0050789	Regulation of biological process
Os2R_MYB14	4530.OS01T0722300-01	GO Process	GO:0050794	Regulation of cellular process
Os2R_MYB14	4530.OS01T0722300-01	GO Process	GO:0051171	Regulation of nitrogen compound metabolic process
Os2R_MYB14	4530.OS01T0722300-01	GO Process	GO:0051252	Regulation of rna metabolic process
Os2R_MYB14	4530.OS01T0722300-01	GO Process	GO:0060255	Regulation of macromolecule metabolic process
Os2R_MYB14	4530.OS01T0722300-01	GO Process	GO:0065007	Biological regulation
Os2R_MYB14	4530.OS01T0722300-01	GO Process	GO:0065009	Regulation of molecular function
Os2R_MYB14	4530.OS01T0722300-01	GO Process	GO:0080090	Regulation of primary metabolic process
Os2R_MYB14	4530.OS01T0722300-01	GO Process	GO:1903506	Regulation of nucleic acid-templated transcription
Os2R_MYB14	4530.OS01T0722300-01	GO Process	GO:2000112	Regulation of cellular macromolecule biosynthetic process
Os2R_MYB14	4530.OS01T0722300-01	GO Process	GO:2001141	Regulation of rna biosynthetic process
Os2R_MYB14	4530.OS01T0722300-01	GO Function	GO:0000976	Transcription regulatory region sequence-specific dna binding
Os2R_MYB14	4530.OS01T0722300-01	GO Function	GO:0001067	Regulatory region nucleic acid binding
Os2R_MYB14	4530.OS01T0722300-01	GO Function	GO:0003676	Nucleic acid binding
Os2R_MYB14	4530.OS01T0722300-01	GO Function	GO:0003677	DNA binding
Os2R_MYB14	4530.OS01T0722300-01	GO Function	GO:0003690	Double-stranded dna binding
Os2R_MYB14	4530.OS01T0722300-01	GO Function	GO:0003700	DNA-binding transcription factor activity
Os2R_MYB14	4530.OS01T0722300-01	GO Function	GO:0005488	Binding
Os2R_MYB14	4530.OS01T0722300-01	GO Function	GO:0043565	Sequence-specific dna binding
Os2R_MYB14	4530.OS01T0722300-01	GO Function	GO:0097159	Organic cyclic compound binding
Os2R_MYB14	4530.OS01T0722300-01	GO Function	GO:0098772	Molecular function regulator
Os2R_MYB14	4530.OS01T0722300-01	GO Function	GO:0140110	Transcription regulator activity
Os2R_MYB14	4530.OS01T0722300-01	GO Function	GO:1901363	Heterocyclic compound binding
Os2R_MYB14	4530.OS01T0722300-01	GO Function	GO:1990837	Sequence-specific double-stranded dna binding
Os2R_MYB14	4530.OS01T0722300-01	GO Component	GO:0005622	Intracellular
Os2R_MYB14	4530.OS01T0722300-01	GO Component	GO:0005634	Nucleus
Os2R_MYB14	4530.OS01T0722300-01	GO Component	GO:0043226	Organelle
Os2R_MYB14	4530.OS01T0722300-01	GO Component	GO:0043227	Membrane-bounded organelle
Os2R_MYB14	4530.OS01T0722300-01	GO Component	GO:0043229	Intracellular organelle
Os2R_MYB14	4530.OS01T0722300-01	GO Component	GO:0043231	Intracellular membrane-bounded organelle
Os2R_MYB14	4530.OS01T0722300-01	GO Component	GO:0110165	Cellular anatomical entity
Os2R_MYB14	4530.OS01T0722300-01	STRING clusters	CL:28130	Mixed, incl. myb-like dna-binding domain, and calmodulin binding protein-like
Os2R_MYB14	4530.OS01T0722300-01	STRING clusters	CL:28131	Mixed, incl. myb-like dna-binding domain, and calmodulin binding protein-like
Os2R_MYB14	4530.OS01T0722300-01	STRING clusters	CL:28305	Mostly uncharacterized, incl. acetyltransferase (gnat) family, and zinc-ribbon
Os2R_MYB14	4530.OS01T0722300-01	STRING clusters	CL:28306	Mostly uncharacterized, incl. zinc-ribbon, and protein early flowering 4
Os2R_MYB14	4530.OS01T0722300-01	STRING clusters	CL:28308	Mixed, incl. zinc-ribbon, and protein early flowering 4
Os2R_MYB14	4530.OS01T0722300-01	STRING clusters	CL:28309	Mixed, incl. protein early flowering 4, and stamen filament development
Os2R_MYB14	4530.OS01T0722300-01	COMPARTMENTS	GOCC:0005622	Intracellular
Os2R_MYB14	4530.OS01T0722300-01	COMPARTMENTS	GOCC:0005634	Nucleus
Os2R_MYB14	4530.OS01T0722300-01	COMPARTMENTS	GOCC:0043226	Organelle
Os2R_MYB14	4530.OS01T0722300-01	COMPARTMENTS	GOCC:0043227	Membrane-bounded organelle
Os2R_MYB14	4530.OS01T0722300-01	COMPARTMENTS	GOCC:0043229	Intracellular organelle
Os2R_MYB14	4530.OS01T0722300-01	COMPARTMENTS	GOCC:0043231	Intracellular membrane-bounded organelle
Os2R_MYB14	4530.OS01T0722300-01	COMPARTMENTS	GOCC:0110165	Cellular anatomical entity
Os2R_MYB14	4530.OS01T0722300-01	UniProt Keywords	KW-0238	DNA-binding
Os2R_MYB14	4530.OS01T0722300-01	UniProt Keywords	KW-0539	Nucleus
Os2R_MYB14	4530.OS01T0722300-01	UniProt Keywords	KW-0804	Transcription
Os2R_MYB14	4530.OS01T0722300-01	UniProt Keywords	KW-0805	Transcription regulation
Os2R_MYB14	4530.OS01T0722300-01	Pfam	PF00249	Myb-like DNA-binding domain
Os2R_MYB14	4530.OS01T0722300-01	Pfam	PF13921	Myb-like DNA-binding domain
Os2R_MYB14	4530.OS01T0722300-01	InterPro	IPR001005	SANT/Myb domain
Os2R_MYB14	4530.OS01T0722300-01	InterPro	IPR009057	Homeobox-like domain superfamily
Os2R_MYB14	4530.OS01T0722300-01	InterPro	IPR017930	Myb domain
Os2R_MYB14	4530.OS01T0722300-01	SMART	SM00717	SANT SWI3, ADA2, N-CoR and TFIIIB DNA-binding domains
Os2R_MYB15	4530.OS01T0812000-02	GO Process	GO:0000003	Reproduction
Os2R_MYB15	4530.OS01T0812000-02	GO Process	GO:0003006	Developmental process involved in reproduction
Os2R_MYB15	4530.OS01T0812000-02	GO Process	GO:0006355	Regulation of transcription, dna-templated
Os2R_MYB15	4530.OS01T0812000-02	GO Process	GO:0007275	Multicellular organism development
Os2R_MYB15	4530.OS01T0812000-02	GO Process	GO:0009555	Pollen development
Os2R_MYB15	4530.OS01T0812000-02	GO Process	GO:0009791	Post-embryonic development
Os2R_MYB15	4530.OS01T0812000-02	GO Process	GO:0009889	Regulation of biosynthetic process
Os2R_MYB15	4530.OS01T0812000-02	GO Process	GO:0009908	Flower development
Os2R_MYB15	4530.OS01T0812000-02	GO Process	GO:0009987	Cellular process
Os2R_MYB15	4530.OS01T0812000-02	GO Process	GO:0010468	Regulation of gene expression
Os2R_MYB15	4530.OS01T0812000-02	GO Process	GO:0010556	Regulation of macromolecule biosynthetic process
Os2R_MYB15	4530.OS01T0812000-02	GO Process	GO:0019219	Regulation of nucleobase-containing compound metabolic process
Os2R_MYB15	4530.OS01T0812000-02	GO Process	GO:0019222	Regulation of metabolic process
Os2R_MYB15	4530.OS01T0812000-02	GO Process	GO:0022414	Reproductive process
Os2R_MYB15	4530.OS01T0812000-02	GO Process	GO:0030154	Cell differentiation
Os2R_MYB15	4530.OS01T0812000-02	GO Process	GO:0031323	Regulation of cellular metabolic process
Os2R_MYB15	4530.OS01T0812000-02	GO Process	GO:0031326	Regulation of cellular biosynthetic process
Os2R_MYB15	4530.OS01T0812000-02	GO Process	GO:0032501	Multicellular organismal process
Os2R_MYB15	4530.OS01T0812000-02	GO Process	GO:0032502	Developmental process
Os2R_MYB15	4530.OS01T0812000-02	GO Process	GO:0048229	Gametophyte development
Os2R_MYB15	4530.OS01T0812000-02	GO Process	GO:0048367	Shoot system development
Os2R_MYB15	4530.OS01T0812000-02	GO Process	GO:0048437	Floral organ development
Os2R_MYB15	4530.OS01T0812000-02	GO Process	GO:0048438	Floral whorl development
Os2R_MYB15	4530.OS01T0812000-02	GO Process	GO:0048443	Stamen development
Os2R_MYB15	4530.OS01T0812000-02	GO Process	GO:0048466	Androecium development
Os2R_MYB15	4530.OS01T0812000-02	GO Process	GO:0048608	Reproductive structure development
Os2R_MYB15	4530.OS01T0812000-02	GO Process	GO:0048653	Anther development
Os2R_MYB15	4530.OS01T0812000-02	GO Process	GO:0048731	System development
Os2R_MYB15	4530.OS01T0812000-02	GO Process	GO:0048827	Phyllome development
Os2R_MYB15	4530.OS01T0812000-02	GO Process	GO:0048856	Anatomical structure development
Os2R_MYB15	4530.OS01T0812000-02	GO Process	GO:0048869	Cellular developmental process
Os2R_MYB15	4530.OS01T0812000-02	GO Process	GO:0050789	Regulation of biological process
Os2R_MYB15	4530.OS01T0812000-02	GO Process	GO:0050794	Regulation of cellular process
Os2R_MYB15	4530.OS01T0812000-02	GO Process	GO:0051171	Regulation of nitrogen compound metabolic process
Os2R_MYB15	4530.OS01T0812000-02	GO Process	GO:0051252	Regulation of rna metabolic process
Os2R_MYB15	4530.OS01T0812000-02	GO Process	GO:0060255	Regulation of macromolecule metabolic process
Os2R_MYB15	4530.OS01T0812000-02	GO Process	GO:0061458	Reproductive system development
Os2R_MYB15	4530.OS01T0812000-02	GO Process	GO:0065007	Biological regulation
Os2R_MYB15	4530.OS01T0812000-02	GO Process	GO:0065009	Regulation of molecular function
Os2R_MYB15	4530.OS01T0812000-02	GO Process	GO:0080090	Regulation of primary metabolic process
Os2R_MYB15	4530.OS01T0812000-02	GO Process	GO:0090567	Reproductive shoot system development
Os2R_MYB15	4530.OS01T0812000-02	GO Process	GO:0099402	Plant organ development
Os2R_MYB15	4530.OS01T0812000-02	GO Process	GO:1903506	Regulation of nucleic acid-templated transcription
Os2R_MYB15	4530.OS01T0812000-02	GO Process	GO:2000112	Regulation of cellular macromolecule biosynthetic process
Os2R_MYB15	4530.OS01T0812000-02	GO Process	GO:2001141	Regulation of rna biosynthetic process
Os2R_MYB15	4530.OS01T0812000-02	GO Function	GO:0000976	Transcription regulatory region sequence-specific dna binding
Os2R_MYB15	4530.OS01T0812000-02	GO Function	GO:0001067	Regulatory region nucleic acid binding
Os2R_MYB15	4530.OS01T0812000-02	GO Function	GO:0003676	Nucleic acid binding
Os2R_MYB15	4530.OS01T0812000-02	GO Function	GO:0003677	DNA binding
Os2R_MYB15	4530.OS01T0812000-02	GO Function	GO:0003690	Double-stranded dna binding
Os2R_MYB15	4530.OS01T0812000-02	GO Function	GO:0003700	DNA-binding transcription factor activity
Os2R_MYB15	4530.OS01T0812000-02	GO Function	GO:0005488	Binding
Os2R_MYB15	4530.OS01T0812000-02	GO Function	GO:0043565	Sequence-specific dna binding
Os2R_MYB15	4530.OS01T0812000-02	GO Function	GO:0097159	Organic cyclic compound binding
Os2R_MYB15	4530.OS01T0812000-02	GO Function	GO:0098772	Molecular function regulator
Os2R_MYB15	4530.OS01T0812000-02	GO Function	GO:0140110	Transcription regulator activity
Os2R_MYB15	4530.OS01T0812000-02	GO Function	GO:1901363	Heterocyclic compound binding
Os2R_MYB15	4530.OS01T0812000-02	GO Function	GO:1990837	Sequence-specific double-stranded dna binding
Os2R_MYB15	4530.OS01T0812000-02	GO Component	GO:0005622	Intracellular
Os2R_MYB15	4530.OS01T0812000-02	GO Component	GO:0005634	Nucleus
Os2R_MYB15	4530.OS01T0812000-02	GO Component	GO:0043226	Organelle
Os2R_MYB15	4530.OS01T0812000-02	GO Component	GO:0043227	Membrane-bounded organelle
Os2R_MYB15	4530.OS01T0812000-02	GO Component	GO:0043229	Intracellular organelle
Os2R_MYB15	4530.OS01T0812000-02	GO Component	GO:0043231	Intracellular membrane-bounded organelle
Os2R_MYB15	4530.OS01T0812000-02	GO Component	GO:0110165	Cellular anatomical entity
Os2R_MYB15	4530.OS01T0812000-02	STRING clusters	CL:33915	Mostly uncharacterized, incl. pollen wall assembly, and anther wall tapetum development
Os2R_MYB15	4530.OS01T0812000-02	STRING clusters	CL:33916	Mostly uncharacterized, incl. pollen wall assembly, and anther wall tapetum development
Os2R_MYB15	4530.OS01T0812000-02	STRING clusters	CL:33918	Mixed, incl. anther wall tapetum development, and pollen wall assembly
Os2R_MYB15	4530.OS01T0812000-02	STRING clusters	CL:33973	Mixed, incl. anther wall tapetum development, and transcription factor gamyb-like
Os2R_MYB15	4530.OS01T0812000-02	STRING clusters	CL:33976	Anther wall tapetum development, and transcription factor gamyb-like
Os2R_MYB15	4530.OS01T0812000-02	COMPARTMENTS	GOCC:0005622	Intracellular
Os2R_MYB15	4530.OS01T0812000-02	COMPARTMENTS	GOCC:0005634	Nucleus
Os2R_MYB15	4530.OS01T0812000-02	COMPARTMENTS	GOCC:0043226	Organelle
Os2R_MYB15	4530.OS01T0812000-02	COMPARTMENTS	GOCC:0043227	Membrane-bounded organelle
Os2R_MYB15	4530.OS01T0812000-02	COMPARTMENTS	GOCC:0043229	Intracellular organelle
Os2R_MYB15	4530.OS01T0812000-02	COMPARTMENTS	GOCC:0043231	Intracellular membrane-bounded organelle
Os2R_MYB15	4530.OS01T0812000-02	COMPARTMENTS	GOCC:0110165	Cellular anatomical entity
Os2R_MYB15	4530.OS01T0812000-02	UniProt Keywords	KW-0010	Activator
Os2R_MYB15	4530.OS01T0812000-02	UniProt Keywords	KW-0025	Alternative splicing
Os2R_MYB15	4530.OS01T0812000-02	UniProt Keywords	KW-0217	Developmental protein
Os2R_MYB15	4530.OS01T0812000-02	UniProt Keywords	KW-0221	Differentiation
Os2R_MYB15	4530.OS01T0812000-02	UniProt Keywords	KW-0238	DNA-binding
Os2R_MYB15	4530.OS01T0812000-02	UniProt Keywords	KW-0287	Flowering
Os2R_MYB15	4530.OS01T0812000-02	UniProt Keywords	KW-0539	Nucleus
Os2R_MYB15	4530.OS01T0812000-02	UniProt Keywords	KW-0677	Repeat
Os2R_MYB15	4530.OS01T0812000-02	UniProt Keywords	KW-0804	Transcription
Os2R_MYB15	4530.OS01T0812000-02	UniProt Keywords	KW-0805	Transcription regulation
Os2R_MYB15	4530.OS01T0812000-02	Pfam	PF00249	Myb-like DNA-binding domain
Os2R_MYB15	4530.OS01T0812000-02	Pfam	PF13921	Myb-like DNA-binding domain
Os2R_MYB15	4530.OS01T0812000-02	InterPro	IPR001005	SANT/Myb domain
Os2R_MYB15	4530.OS01T0812000-02	InterPro	IPR009057	Homeobox-like domain superfamily
Os2R_MYB15	4530.OS01T0812000-02	InterPro	IPR016310	Transcription factor GAMYB-like
Os2R_MYB15	4530.OS01T0812000-02	InterPro	IPR017930	Myb domain
Os2R_MYB15	4530.OS01T0812000-02	SMART	SM00717	SANT SWI3, ADA2, N-CoR and TFIIIB DNA-binding domains
Os2R_MYB16	4530.OS01T0850400-01	GO Process	GO:0006355	Regulation of transcription, dna-templated
Os2R_MYB16	4530.OS01T0850400-01	GO Process	GO:0009889	Regulation of biosynthetic process
Os2R_MYB16	4530.OS01T0850400-01	GO Process	GO:0010468	Regulation of gene expression
Os2R_MYB16	4530.OS01T0850400-01	GO Process	GO:0010556	Regulation of macromolecule biosynthetic process
Os2R_MYB16	4530.OS01T0850400-01	GO Process	GO:0019219	Regulation of nucleobase-containing compound metabolic process
Os2R_MYB16	4530.OS01T0850400-01	GO Process	GO:0019222	Regulation of metabolic process
Os2R_MYB16	4530.OS01T0850400-01	GO Process	GO:0031323	Regulation of cellular metabolic process
Os2R_MYB16	4530.OS01T0850400-01	GO Process	GO:0031326	Regulation of cellular biosynthetic process
Os2R_MYB16	4530.OS01T0850400-01	GO Process	GO:0050789	Regulation of biological process
Os2R_MYB16	4530.OS01T0850400-01	GO Process	GO:0050794	Regulation of cellular process
Os2R_MYB16	4530.OS01T0850400-01	GO Process	GO:0051171	Regulation of nitrogen compound metabolic process
Os2R_MYB16	4530.OS01T0850400-01	GO Process	GO:0051252	Regulation of rna metabolic process
Os2R_MYB16	4530.OS01T0850400-01	GO Process	GO:0060255	Regulation of macromolecule metabolic process
Os2R_MYB16	4530.OS01T0850400-01	GO Process	GO:0065007	Biological regulation
Os2R_MYB16	4530.OS01T0850400-01	GO Process	GO:0065009	Regulation of molecular function
Os2R_MYB16	4530.OS01T0850400-01	GO Process	GO:0080090	Regulation of primary metabolic process
Os2R_MYB16	4530.OS01T0850400-01	GO Process	GO:1903506	Regulation of nucleic acid-templated transcription
Os2R_MYB16	4530.OS01T0850400-01	GO Process	GO:2000112	Regulation of cellular macromolecule biosynthetic process
Os2R_MYB16	4530.OS01T0850400-01	GO Process	GO:2001141	Regulation of rna biosynthetic process
Os2R_MYB16	4530.OS01T0850400-01	GO Function	GO:0000976	Transcription regulatory region sequence-specific dna binding
Os2R_MYB16	4530.OS01T0850400-01	GO Function	GO:0001067	Regulatory region nucleic acid binding
Os2R_MYB16	4530.OS01T0850400-01	GO Function	GO:0003676	Nucleic acid binding
Os2R_MYB16	4530.OS01T0850400-01	GO Function	GO:0003677	DNA binding
Os2R_MYB16	4530.OS01T0850400-01	GO Function	GO:0003690	Double-stranded dna binding
Os2R_MYB16	4530.OS01T0850400-01	GO Function	GO:0003700	DNA-binding transcription factor activity
Os2R_MYB16	4530.OS01T0850400-01	GO Function	GO:0003712	Transcription coregulator activity
Os2R_MYB16	4530.OS01T0850400-01	GO Function	GO:0005488	Binding
Os2R_MYB16	4530.OS01T0850400-01	GO Function	GO:0043565	Sequence-specific dna binding
Os2R_MYB16	4530.OS01T0850400-01	GO Function	GO:0097159	Organic cyclic compound binding
Os2R_MYB16	4530.OS01T0850400-01	GO Function	GO:0098772	Molecular function regulator
Os2R_MYB16	4530.OS01T0850400-01	GO Function	GO:0140110	Transcription regulator activity
Os2R_MYB16	4530.OS01T0850400-01	GO Function	GO:1901363	Heterocyclic compound binding
Os2R_MYB16	4530.OS01T0850400-01	GO Function	GO:1990837	Sequence-specific double-stranded dna binding
Os2R_MYB16	4530.OS01T0850400-01	GO Component	GO:0005622	Intracellular
Os2R_MYB16	4530.OS01T0850400-01	GO Component	GO:0005634	Nucleus
Os2R_MYB16	4530.OS01T0850400-01	GO Component	GO:0043226	Organelle
Os2R_MYB16	4530.OS01T0850400-01	GO Component	GO:0043227	Membrane-bounded organelle
Os2R_MYB16	4530.OS01T0850400-01	GO Component	GO:0043229	Intracellular organelle
Os2R_MYB16	4530.OS01T0850400-01	GO Component	GO:0043231	Intracellular membrane-bounded organelle
Os2R_MYB16	4530.OS01T0850400-01	GO Component	GO:0110165	Cellular anatomical entity
Os2R_MYB16	4530.OS01T0850400-01	STRING clusters	CL:46035	Mixed, incl. other glycan degradation, and magnesium transporter mrs2-like
Os2R_MYB16	4530.OS01T0850400-01	STRING clusters	CL:46040	Mostly uncharacterized, incl. magnesium transporter mrs2-like, and glycoside hydrolase, family 79
Os2R_MYB16	4530.OS01T0850400-01	STRING clusters	CL:46045	Mostly uncharacterized, incl. magnesium transporter mrs2-like, and glycoside hydrolase, family 79
Os2R_MYB16	4530.OS01T0850400-01	STRING clusters	CL:46050	Mostly uncharacterized, incl. magnesium transporter mrs2-like, and glycoside hydrolase, family 79
Os2R_MYB16	4530.OS01T0850400-01	STRING clusters	CL:46051	Mixed, incl. magnesium transporter mrs2-like, and transferase
Os2R_MYB16	4530.OS01T0850400-01	COMPARTMENTS	GOCC:0005622	Intracellular
Os2R_MYB16	4530.OS01T0850400-01	COMPARTMENTS	GOCC:0005634	Nucleus
Os2R_MYB16	4530.OS01T0850400-01	COMPARTMENTS	GOCC:0043226	Organelle
Os2R_MYB16	4530.OS01T0850400-01	COMPARTMENTS	GOCC:0043227	Membrane-bounded organelle
Os2R_MYB16	4530.OS01T0850400-01	COMPARTMENTS	GOCC:0043229	Intracellular organelle
Os2R_MYB16	4530.OS01T0850400-01	COMPARTMENTS	GOCC:0043231	Intracellular membrane-bounded organelle
Os2R_MYB16	4530.OS01T0850400-01	COMPARTMENTS	GOCC:0110165	Cellular anatomical entity
Os2R_MYB16	4530.OS01T0850400-01	UniProt Keywords	KW-0238	DNA-binding
Os2R_MYB16	4530.OS01T0850400-01	UniProt Keywords	KW-0539	Nucleus
Os2R_MYB16	4530.OS01T0850400-01	UniProt Keywords	KW-0804	Transcription
Os2R_MYB16	4530.OS01T0850400-01	UniProt Keywords	KW-0805	Transcription regulation
Os2R_MYB16	4530.OS01T0850400-01	Pfam	PF00249	Myb-like DNA-binding domain
Os2R_MYB16	4530.OS01T0850400-01	Pfam	PF13921	Myb-like DNA-binding domain
Os2R_MYB16	4530.OS01T0850400-01	InterPro	IPR001005	SANT/Myb domain
Os2R_MYB16	4530.OS01T0850400-01	InterPro	IPR009057	Homeobox-like domain superfamily
Os2R_MYB16	4530.OS01T0850400-01	InterPro	IPR017930	Myb domain
Os2R_MYB16	4530.OS01T0850400-01	SMART	SM00717	SANT SWI3, ADA2, N-CoR and TFIIIB DNA-binding domains
Os2R_MYB19	4530.OS01T0975300-02	GO Process	GO:0006355	Regulation of transcription, dna-templated
Os2R_MYB19	4530.OS01T0975300-02	GO Process	GO:0009889	Regulation of biosynthetic process
Os2R_MYB19	4530.OS01T0975300-02	GO Process	GO:0010468	Regulation of gene expression
Os2R_MYB19	4530.OS01T0975300-02	GO Process	GO:0010556	Regulation of macromolecule biosynthetic process
Os2R_MYB19	4530.OS01T0975300-02	GO Process	GO:0019219	Regulation of nucleobase-containing compound metabolic process
Os2R_MYB19	4530.OS01T0975300-02	GO Process	GO:0019222	Regulation of metabolic process
Os2R_MYB19	4530.OS01T0975300-02	GO Process	GO:0031323	Regulation of cellular metabolic process
Os2R_MYB19	4530.OS01T0975300-02	GO Process	GO:0031326	Regulation of cellular biosynthetic process
Os2R_MYB19	4530.OS01T0975300-02	GO Process	GO:0050789	Regulation of biological process
Os2R_MYB19	4530.OS01T0975300-02	GO Process	GO:0050794	Regulation of cellular process
Os2R_MYB19	4530.OS01T0975300-02	GO Process	GO:0051171	Regulation of nitrogen compound metabolic process
Os2R_MYB19	4530.OS01T0975300-02	GO Process	GO:0051252	Regulation of rna metabolic process
Os2R_MYB19	4530.OS01T0975300-02	GO Process	GO:0060255	Regulation of macromolecule metabolic process
Os2R_MYB19	4530.OS01T0975300-02	GO Process	GO:0065007	Biological regulation
Os2R_MYB19	4530.OS01T0975300-02	GO Process	GO:0080090	Regulation of primary metabolic process
Os2R_MYB19	4530.OS01T0975300-02	GO Process	GO:1903506	Regulation of nucleic acid-templated transcription
Os2R_MYB19	4530.OS01T0975300-02	GO Process	GO:2000112	Regulation of cellular macromolecule biosynthetic process
Os2R_MYB19	4530.OS01T0975300-02	GO Process	GO:2001141	Regulation of rna biosynthetic process
Os2R_MYB19	4530.OS01T0975300-02	GO Function	GO:0003676	Nucleic acid binding
Os2R_MYB19	4530.OS01T0975300-02	GO Function	GO:0003677	DNA binding
Os2R_MYB19	4530.OS01T0975300-02	GO Function	GO:0005488	Binding
Os2R_MYB19	4530.OS01T0975300-02	GO Function	GO:0043565	Sequence-specific dna binding
Os2R_MYB19	4530.OS01T0975300-02	GO Function	GO:0097159	Organic cyclic compound binding
Os2R_MYB19	4530.OS01T0975300-02	GO Function	GO:1901363	Heterocyclic compound binding
Os2R_MYB19	4530.OS01T0975300-02	GO Component	GO:0005622	Intracellular
Os2R_MYB19	4530.OS01T0975300-02	GO Component	GO:0005634	Nucleus
Os2R_MYB19	4530.OS01T0975300-02	GO Component	GO:0043226	Organelle
Os2R_MYB19	4530.OS01T0975300-02	GO Component	GO:0043227	Membrane-bounded organelle
Os2R_MYB19	4530.OS01T0975300-02	GO Component	GO:0043229	Intracellular organelle
Os2R_MYB19	4530.OS01T0975300-02	GO Component	GO:0043231	Intracellular membrane-bounded organelle
Os2R_MYB19	4530.OS01T0975300-02	GO Component	GO:0110165	Cellular anatomical entity
Os2R_MYB19	4530.OS01T0975300-02	STRING clusters	CL:42252	Mostly uncharacterized, incl. late embryogenesis abundant protein, lea_2 subgroup, and lipid droplet
Os2R_MYB19	4530.OS01T0975300-02	STRING clusters	CL:42253	Mostly uncharacterized, incl. late embryogenesis abundant protein, lea_2 subgroup, and lipid droplet
Os2R_MYB19	4530.OS01T0975300-02	STRING clusters	CL:42254	Mostly uncharacterized, incl. late embryogenesis abundant protein, lea_2 subgroup, and dehydrin
Os2R_MYB19	4530.OS01T0975300-02	STRING clusters	CL:42256	Mostly uncharacterized, incl. late embryogenesis abundant protein, lea_2 subgroup, and dehydrin
Os2R_MYB19	4530.OS01T0975300-02	STRING clusters	CL:42366	Mixed, incl. late embryogenesis abundant protein 18, and positive regulation of alcohol biosynthetic process
Os2R_MYB19	4530.OS01T0975300-02	STRING clusters	CL:42367	Mixed, incl. cysteine-rich secretory protein family, and plasmodesmata-mediated intercellular transport
Os2R_MYB19	4530.OS01T0975300-02	STRING clusters	CL:42371	Mixed, incl. anaphase-promoting complex subunit 11 ring-h2 finger, and myb-like dna-binding domain
Os2R_MYB19	4530.OS01T0975300-02	COMPARTMENTS	GOCC:0005622	Intracellular
Os2R_MYB19	4530.OS01T0975300-02	COMPARTMENTS	GOCC:0005634	Nucleus
Os2R_MYB19	4530.OS01T0975300-02	COMPARTMENTS	GOCC:0043226	Organelle
Os2R_MYB19	4530.OS01T0975300-02	COMPARTMENTS	GOCC:0043227	Membrane-bounded organelle
Os2R_MYB19	4530.OS01T0975300-02	COMPARTMENTS	GOCC:0043229	Intracellular organelle
Os2R_MYB19	4530.OS01T0975300-02	COMPARTMENTS	GOCC:0043231	Intracellular membrane-bounded organelle
Os2R_MYB19	4530.OS01T0975300-02	COMPARTMENTS	GOCC:0110165	Cellular anatomical entity
Os2R_MYB19	4530.OS01T0975300-02	Pfam	PF00249	Myb-like DNA-binding domain
Os2R_MYB19	4530.OS01T0975300-02	Pfam	PF13921	Myb-like DNA-binding domain
Os2R_MYB19	4530.OS01T0975300-02	InterPro	IPR001005	SANT/Myb domain
Os2R_MYB19	4530.OS01T0975300-02	InterPro	IPR009057	Homeobox-like domain superfamily
Os2R_MYB19	4530.OS01T0975300-02	InterPro	IPR017930	Myb domain
Os2R_MYB19	4530.OS01T0975300-02	SMART	SM00717	SANT SWI3, ADA2, N-CoR and TFIIIB DNA-binding domains
Os2R_MYB2	4530.OS01T0142500-01	GO Process	GO:0009889	Regulation of biosynthetic process
Os2R_MYB2	4530.OS01T0142500-01	GO Process	GO:0010468	Regulation of gene expression
Os2R_MYB2	4530.OS01T0142500-01	GO Process	GO:0010556	Regulation of macromolecule biosynthetic process
Os2R_MYB2	4530.OS01T0142500-01	GO Process	GO:0019222	Regulation of metabolic process
Os2R_MYB2	4530.OS01T0142500-01	GO Process	GO:0031323	Regulation of cellular metabolic process
Os2R_MYB2	4530.OS01T0142500-01	GO Process	GO:0031326	Regulation of cellular biosynthetic process
Os2R_MYB2	4530.OS01T0142500-01	GO Process	GO:0050789	Regulation of biological process
Os2R_MYB2	4530.OS01T0142500-01	GO Process	GO:0050794	Regulation of cellular process
Os2R_MYB2	4530.OS01T0142500-01	GO Process	GO:0051171	Regulation of nitrogen compound metabolic process
Os2R_MYB2	4530.OS01T0142500-01	GO Process	GO:0060255	Regulation of macromolecule metabolic process
Os2R_MYB2	4530.OS01T0142500-01	GO Process	GO:0065007	Biological regulation
Os2R_MYB2	4530.OS01T0142500-01	GO Process	GO:0080090	Regulation of primary metabolic process
Os2R_MYB2	4530.OS01T0142500-01	GO Process	GO:2000112	Regulation of cellular macromolecule biosynthetic process
Os2R_MYB2	4530.OS01T0142500-01	GO Function	GO:0003676	Nucleic acid binding
Os2R_MYB2	4530.OS01T0142500-01	GO Function	GO:0003677	DNA binding
Os2R_MYB2	4530.OS01T0142500-01	GO Function	GO:0005488	Binding
Os2R_MYB2	4530.OS01T0142500-01	GO Function	GO:0097159	Organic cyclic compound binding
Os2R_MYB2	4530.OS01T0142500-01	GO Function	GO:1901363	Heterocyclic compound binding
Os2R_MYB2	4530.OS01T0142500-01	GO Component	GO:0005622	Intracellular
Os2R_MYB2	4530.OS01T0142500-01	GO Component	GO:0005634	Nucleus
Os2R_MYB2	4530.OS01T0142500-01	GO Component	GO:0005737	Cytoplasm
Os2R_MYB2	4530.OS01T0142500-01	GO Component	GO:0005829	Cytosol
Os2R_MYB2	4530.OS01T0142500-01	GO Component	GO:0043226	Organelle
Os2R_MYB2	4530.OS01T0142500-01	GO Component	GO:0043227	Membrane-bounded organelle
Os2R_MYB2	4530.OS01T0142500-01	GO Component	GO:0043229	Intracellular organelle
Os2R_MYB2	4530.OS01T0142500-01	GO Component	GO:0043231	Intracellular membrane-bounded organelle
Os2R_MYB2	4530.OS01T0142500-01	GO Component	GO:0110165	Cellular anatomical entity
Os2R_MYB2	4530.OS01T0142500-01	STRING clusters	CL:35026	Mixed, incl. homeobox, and ovate protein family
Os2R_MYB2	4530.OS01T0142500-01	STRING clusters	CL:35233	Mixed, incl. tracheary element differentiation, and zf-hd protein dimerisation region
Os2R_MYB2	4530.OS01T0142500-01	STRING clusters	CL:35293	Mixed, incl. protein scai, and zf-hd protein dimerisation region
Os2R_MYB2	4530.OS01T0142500-01	STRING clusters	CL:35297	Mixed, incl. protein scai, and protein of unknown function (duf1674)
Os2R_MYB2	4530.OS01T0142500-01	STRING clusters	CL:35301	Mixed, incl. protein of unknown function (duf1674), and sulfation
Os2R_MYB2	4530.OS01T0142500-01	COMPARTMENTS	GOCC:0005622	Intracellular
Os2R_MYB2	4530.OS01T0142500-01	COMPARTMENTS	GOCC:0043226	Organelle
Os2R_MYB2	4530.OS01T0142500-01	COMPARTMENTS	GOCC:0043227	Membrane-bounded organelle
Os2R_MYB2	4530.OS01T0142500-01	COMPARTMENTS	GOCC:0043229	Intracellular organelle
Os2R_MYB2	4530.OS01T0142500-01	COMPARTMENTS	GOCC:0043231	Intracellular membrane-bounded organelle
Os2R_MYB2	4530.OS01T0142500-01	COMPARTMENTS	GOCC:0110165	Cellular anatomical entity
Os2R_MYB2	4530.OS01T0142500-01	UniProt Keywords	KW-0238	DNA-binding
Os2R_MYB2	4530.OS01T0142500-01	UniProt Keywords	KW-0539	Nucleus
Os2R_MYB2	4530.OS01T0142500-01	UniProt Keywords	KW-0804	Transcription
Os2R_MYB2	4530.OS01T0142500-01	UniProt Keywords	KW-0805	Transcription regulation
Os2R_MYB2	4530.OS01T0142500-01	Pfam	PF00249	Myb-like DNA-binding domain
Os2R_MYB2	4530.OS01T0142500-01	Pfam	PF13921	Myb-like DNA-binding domain
Os2R_MYB2	4530.OS01T0142500-01	InterPro	IPR001005	SANT/Myb domain
Os2R_MYB2	4530.OS01T0142500-01	InterPro	IPR006447	Myb domain, plants
Os2R_MYB2	4530.OS01T0142500-01	InterPro	IPR009057	Homeobox-like domain superfamily
Os2R_MYB2	4530.OS01T0142500-01	InterPro	IPR017884	SANT domain
Os2R_MYB2	4530.OS01T0142500-01	InterPro	IPR017930	Myb domain
Os2R_MYB2	4530.OS01T0142500-01	InterPro	IPR043363	Transcription factor DIVARICATA-like
Os2R_MYB2	4530.OS01T0142500-01	SMART	SM00717	SANT SWI3, ADA2, N-CoR and TFIIIB DNA-binding domains
Os2R_MYB20	4530.OS01T0977300-01	GO Process	GO:0001101	Response to acid chemical
Os2R_MYB20	4530.OS01T0977300-01	GO Process	GO:0002831	Regulation of response to biotic stimulus
Os2R_MYB20	4530.OS01T0977300-01	GO Process	GO:0006355	Regulation of transcription, dna-templated
Os2R_MYB20	4530.OS01T0977300-01	GO Process	GO:0006950	Response to stress
Os2R_MYB20	4530.OS01T0977300-01	GO Process	GO:0006952	Defense response
Os2R_MYB20	4530.OS01T0977300-01	GO Process	GO:0006970	Response to osmotic stress
Os2R_MYB20	4530.OS01T0977300-01	GO Process	GO:0007154	Cell communication
Os2R_MYB20	4530.OS01T0977300-01	GO Process	GO:0007165	Signal transduction
Os2R_MYB20	4530.OS01T0977300-01	GO Process	GO:0009414	Response to water deprivation
Os2R_MYB20	4530.OS01T0977300-01	GO Process	GO:0009415	Response to water
Os2R_MYB20	4530.OS01T0977300-01	GO Process	GO:0009605	Response to external stimulus
Os2R_MYB20	4530.OS01T0977300-01	GO Process	GO:0009607	Response to biotic stimulus
Os2R_MYB20	4530.OS01T0977300-01	GO Process	GO:0009617	Response to bacterium
Os2R_MYB20	4530.OS01T0977300-01	GO Process	GO:0009620	Response to fungus
Os2R_MYB20	4530.OS01T0977300-01	GO Process	GO:0009628	Response to abiotic stimulus
Os2R_MYB20	4530.OS01T0977300-01	GO Process	GO:0009651	Response to salt stress
Os2R_MYB20	4530.OS01T0977300-01	GO Process	GO:0009719	Response to endogenous stimulus
Os2R_MYB20	4530.OS01T0977300-01	GO Process	GO:0009725	Response to hormone
Os2R_MYB20	4530.OS01T0977300-01	GO Process	GO:0009737	Response to abscisic acid
Os2R_MYB20	4530.OS01T0977300-01	GO Process	GO:0009738	Abscisic acid-activated signaling pathway
Os2R_MYB20	4530.OS01T0977300-01	GO Process	GO:0009751	Response to salicylic acid
Os2R_MYB20	4530.OS01T0977300-01	GO Process	GO:0009753	Response to jasmonic acid
Os2R_MYB20	4530.OS01T0977300-01	GO Process	GO:0009755	Hormone-mediated signaling pathway
Os2R_MYB20	4530.OS01T0977300-01	GO Process	GO:0009889	Regulation of biosynthetic process
Os2R_MYB20	4530.OS01T0977300-01	GO Process	GO:0009966	Regulation of signal transduction
Os2R_MYB20	4530.OS01T0977300-01	GO Process	GO:0009967	Positive regulation of signal transduction
Os2R_MYB20	4530.OS01T0977300-01	GO Process	GO:0009987	Cellular process
Os2R_MYB20	4530.OS01T0977300-01	GO Process	GO:0010033	Response to organic substance
Os2R_MYB20	4530.OS01T0977300-01	GO Process	GO:0010035	Response to inorganic substance
Os2R_MYB20	4530.OS01T0977300-01	GO Process	GO:0010200	Response to chitin
Os2R_MYB20	4530.OS01T0977300-01	GO Process	GO:0010243	Response to organonitrogen compound
Os2R_MYB20	4530.OS01T0977300-01	GO Process	GO:0010468	Regulation of gene expression
Os2R_MYB20	4530.OS01T0977300-01	GO Process	GO:0010556	Regulation of macromolecule biosynthetic process
Os2R_MYB20	4530.OS01T0977300-01	GO Process	GO:0010646	Regulation of cell communication
Os2R_MYB20	4530.OS01T0977300-01	GO Process	GO:0010647	Positive regulation of cell communication
Os2R_MYB20	4530.OS01T0977300-01	GO Process	GO:0010928	Regulation of auxin mediated signaling pathway
Os2R_MYB20	4530.OS01T0977300-01	GO Process	GO:0010929	Positive regulation of auxin mediated signaling pathway
Os2R_MYB20	4530.OS01T0977300-01	GO Process	GO:0014070	Response to organic cyclic compound
Os2R_MYB20	4530.OS01T0977300-01	GO Process	GO:0019219	Regulation of nucleobase-containing compound metabolic process
Os2R_MYB20	4530.OS01T0977300-01	GO Process	GO:0019222	Regulation of metabolic process
Os2R_MYB20	4530.OS01T0977300-01	GO Process	GO:0023051	Regulation of signaling
Os2R_MYB20	4530.OS01T0977300-01	GO Process	GO:0023052	Signaling
Os2R_MYB20	4530.OS01T0977300-01	GO Process	GO:0023056	Positive regulation of signaling
Os2R_MYB20	4530.OS01T0977300-01	GO Process	GO:0031323	Regulation of cellular metabolic process
Os2R_MYB20	4530.OS01T0977300-01	GO Process	GO:0031326	Regulation of cellular biosynthetic process
Os2R_MYB20	4530.OS01T0977300-01	GO Process	GO:0031347	Regulation of defense response
Os2R_MYB20	4530.OS01T0977300-01	GO Process	GO:0032101	Regulation of response to external stimulus
Os2R_MYB20	4530.OS01T0977300-01	GO Process	GO:0032870	Cellular response to hormone stimulus
Os2R_MYB20	4530.OS01T0977300-01	GO Process	GO:0033993	Response to lipid
Os2R_MYB20	4530.OS01T0977300-01	GO Process	GO:0042221	Response to chemical
Os2R_MYB20	4530.OS01T0977300-01	GO Process	GO:0042742	Defense response to bacterium
Os2R_MYB20	4530.OS01T0977300-01	GO Process	GO:0043207	Response to external biotic stimulus
Os2R_MYB20	4530.OS01T0977300-01	GO Process	GO:0044419	Interspecies interaction between organisms
Os2R_MYB20	4530.OS01T0977300-01	GO Process	GO:0048518	Positive regulation of biological process
Os2R_MYB20	4530.OS01T0977300-01	GO Process	GO:0048522	Positive regulation of cellular process
Os2R_MYB20	4530.OS01T0977300-01	GO Process	GO:0048583	Regulation of response to stimulus
Os2R_MYB20	4530.OS01T0977300-01	GO Process	GO:0048584	Positive regulation of response to stimulus
Os2R_MYB20	4530.OS01T0977300-01	GO Process	GO:0050789	Regulation of biological process
Os2R_MYB20	4530.OS01T0977300-01	GO Process	GO:0050794	Regulation of cellular process
Os2R_MYB20	4530.OS01T0977300-01	GO Process	GO:0050832	Defense response to fungus
Os2R_MYB20	4530.OS01T0977300-01	GO Process	GO:0050896	Response to stimulus
Os2R_MYB20	4530.OS01T0977300-01	GO Process	GO:0051171	Regulation of nitrogen compound metabolic process
Os2R_MYB20	4530.OS01T0977300-01	GO Process	GO:0051252	Regulation of rna metabolic process
Os2R_MYB20	4530.OS01T0977300-01	GO Process	GO:0051707	Response to other organism
Os2R_MYB20	4530.OS01T0977300-01	GO Process	GO:0051716	Cellular response to stimulus
Os2R_MYB20	4530.OS01T0977300-01	GO Process	GO:0060255	Regulation of macromolecule metabolic process
Os2R_MYB20	4530.OS01T0977300-01	GO Process	GO:0065007	Biological regulation
Os2R_MYB20	4530.OS01T0977300-01	GO Process	GO:0065009	Regulation of molecular function
Os2R_MYB20	4530.OS01T0977300-01	GO Process	GO:0070887	Cellular response to chemical stimulus
Os2R_MYB20	4530.OS01T0977300-01	GO Process	GO:0071215	Cellular response to abscisic acid stimulus
Os2R_MYB20	4530.OS01T0977300-01	GO Process	GO:0071310	Cellular response to organic substance
Os2R_MYB20	4530.OS01T0977300-01	GO Process	GO:0071396	Cellular response to lipid
Os2R_MYB20	4530.OS01T0977300-01	GO Process	GO:0071495	Cellular response to endogenous stimulus
Os2R_MYB20	4530.OS01T0977300-01	GO Process	GO:0080090	Regulation of primary metabolic process
Os2R_MYB20	4530.OS01T0977300-01	GO Process	GO:0080134	Regulation of response to stress
Os2R_MYB20	4530.OS01T0977300-01	GO Process	GO:0097305	Response to alcohol
Os2R_MYB20	4530.OS01T0977300-01	GO Process	GO:0097306	Cellular response to alcohol
Os2R_MYB20	4530.OS01T0977300-01	GO Process	GO:0098542	Defense response to other organism
Os2R_MYB20	4530.OS01T0977300-01	GO Process	GO:1900150	Regulation of defense response to fungus
Os2R_MYB20	4530.OS01T0977300-01	GO Process	GO:1901698	Response to nitrogen compound
Os2R_MYB20	4530.OS01T0977300-01	GO Process	GO:1901700	Response to oxygen-containing compound
Os2R_MYB20	4530.OS01T0977300-01	GO Process	GO:1901701	Cellular response to oxygen-containing compound
Os2R_MYB20	4530.OS01T0977300-01	GO Process	GO:1903506	Regulation of nucleic acid-templated transcription
Os2R_MYB20	4530.OS01T0977300-01	GO Process	GO:2000022	Regulation of jasmonic acid mediated signaling pathway
Os2R_MYB20	4530.OS01T0977300-01	GO Process	GO:2000031	Regulation of salicylic acid mediated signaling pathway
Os2R_MYB20	4530.OS01T0977300-01	GO Process	GO:2000112	Regulation of cellular macromolecule biosynthetic process
Os2R_MYB20	4530.OS01T0977300-01	GO Process	GO:2001141	Regulation of rna biosynthetic process
Os2R_MYB20	4530.OS01T0977300-01	GO Function	GO:0000976	Transcription regulatory region sequence-specific dna binding
Os2R_MYB20	4530.OS01T0977300-01	GO Function	GO:0001067	Regulatory region nucleic acid binding
Os2R_MYB20	4530.OS01T0977300-01	GO Function	GO:0003676	Nucleic acid binding
Os2R_MYB20	4530.OS01T0977300-01	GO Function	GO:0003677	DNA binding
Os2R_MYB20	4530.OS01T0977300-01	GO Function	GO:0003690	Double-stranded dna binding
Os2R_MYB20	4530.OS01T0977300-01	GO Function	GO:0003700	DNA-binding transcription factor activity
Os2R_MYB20	4530.OS01T0977300-01	GO Function	GO:0003712	Transcription coregulator activity
Os2R_MYB20	4530.OS01T0977300-01	GO Function	GO:0005488	Binding
Os2R_MYB20	4530.OS01T0977300-01	GO Function	GO:0043565	Sequence-specific dna binding
Os2R_MYB20	4530.OS01T0977300-01	GO Function	GO:0097159	Organic cyclic compound binding
Os2R_MYB20	4530.OS01T0977300-01	GO Function	GO:0098772	Molecular function regulator
Os2R_MYB20	4530.OS01T0977300-01	GO Function	GO:0140110	Transcription regulator activity
Os2R_MYB20	4530.OS01T0977300-01	GO Function	GO:1901363	Heterocyclic compound binding
Os2R_MYB20	4530.OS01T0977300-01	GO Function	GO:1990837	Sequence-specific double-stranded dna binding
Os2R_MYB20	4530.OS01T0977300-01	GO Component	GO:0005622	Intracellular
Os2R_MYB20	4530.OS01T0977300-01	GO Component	GO:0005634	Nucleus
Os2R_MYB20	4530.OS01T0977300-01	GO Component	GO:0043226	Organelle
Os2R_MYB20	4530.OS01T0977300-01	GO Component	GO:0043227	Membrane-bounded organelle
Os2R_MYB20	4530.OS01T0977300-01	GO Component	GO:0043229	Intracellular organelle
Os2R_MYB20	4530.OS01T0977300-01	GO Component	GO:0043231	Intracellular membrane-bounded organelle
Os2R_MYB20	4530.OS01T0977300-01	GO Component	GO:0110165	Cellular anatomical entity
Os2R_MYB20	4530.OS01T0977300-01	STRING clusters	CL:41441	Mostly uncharacterized, incl. carbohydrate transmembrane transporter activity, and c2 domain
Os2R_MYB20	4530.OS01T0977300-01	STRING clusters	CL:41442	Mostly uncharacterized, incl. c2 domain, and myb-like dna-binding domain
Os2R_MYB20	4530.OS01T0977300-01	STRING clusters	CL:41582	Mostly uncharacterized, incl. protein storage vacuole membrane, and anthocyanin biosynthesis
Os2R_MYB20	4530.OS01T0977300-01	STRING clusters	CL:41586	Mostly uncharacterized, incl. anthocyanin biosynthesis, and response to uv-a
Os2R_MYB20	4530.OS01T0977300-01	STRING clusters	CL:41587	Mixed, incl. anthocyanin biosynthesis, and response to uv-a
Os2R_MYB20	4530.OS01T0977300-01	STRING clusters	CL:41589	Mixed, incl. anthocyanin biosynthesis, and response to uv-a
Os2R_MYB20	4530.OS01T0977300-01	STRING clusters	CL:41591	Mixed, incl. anthocyanin biosynthesis, and low-affinity nitrate transmembrane transporter activity
Os2R_MYB20	4530.OS01T0977300-01	STRING clusters	CL:41595	Mixed, incl. anthocyanin biosynthesis, and low-affinity nitrate transmembrane transporter activity
Os2R_MYB20	4530.OS01T0977300-01	COMPARTMENTS	GOCC:0005622	Intracellular
Os2R_MYB20	4530.OS01T0977300-01	COMPARTMENTS	GOCC:0005634	Nucleus
Os2R_MYB20	4530.OS01T0977300-01	COMPARTMENTS	GOCC:0043226	Organelle
Os2R_MYB20	4530.OS01T0977300-01	COMPARTMENTS	GOCC:0043227	Membrane-bounded organelle
Os2R_MYB20	4530.OS01T0977300-01	COMPARTMENTS	GOCC:0043229	Intracellular organelle
Os2R_MYB20	4530.OS01T0977300-01	COMPARTMENTS	GOCC:0043231	Intracellular membrane-bounded organelle
Os2R_MYB20	4530.OS01T0977300-01	COMPARTMENTS	GOCC:0110165	Cellular anatomical entity
Os2R_MYB20	4530.OS01T0977300-01	UniProt Keywords	KW-0238	DNA-binding
Os2R_MYB20	4530.OS01T0977300-01	UniProt Keywords	KW-0539	Nucleus
Os2R_MYB20	4530.OS01T0977300-01	UniProt Keywords	KW-0804	Transcription
Os2R_MYB20	4530.OS01T0977300-01	UniProt Keywords	KW-0805	Transcription regulation
Os2R_MYB20	4530.OS01T0977300-01	Pfam	PF00249	Myb-like DNA-binding domain
Os2R_MYB20	4530.OS01T0977300-01	Pfam	PF13921	Myb-like DNA-binding domain
Os2R_MYB20	4530.OS01T0977300-01	InterPro	IPR001005	SANT/Myb domain
Os2R_MYB20	4530.OS01T0977300-01	InterPro	IPR009057	Homeobox-like domain superfamily
Os2R_MYB20	4530.OS01T0977300-01	InterPro	IPR017930	Myb domain
Os2R_MYB20	4530.OS01T0977300-01	SMART	SM00717	SANT SWI3, ADA2, N-CoR and TFIIIB DNA-binding domains
Os2R_MYB22	4530.OS02T0187700-00	GO Process	GO:0006355	Regulation of transcription, dna-templated
Os2R_MYB22	4530.OS02T0187700-00	GO Process	GO:0009889	Regulation of biosynthetic process
Os2R_MYB22	4530.OS02T0187700-00	GO Process	GO:0009987	Cellular process
Os2R_MYB22	4530.OS02T0187700-00	GO Process	GO:0010468	Regulation of gene expression
Os2R_MYB22	4530.OS02T0187700-00	GO Process	GO:0010556	Regulation of macromolecule biosynthetic process
Os2R_MYB22	4530.OS02T0187700-00	GO Process	GO:0019219	Regulation of nucleobase-containing compound metabolic process
Os2R_MYB22	4530.OS02T0187700-00	GO Process	GO:0019222	Regulation of metabolic process
Os2R_MYB22	4530.OS02T0187700-00	GO Process	GO:0031323	Regulation of cellular metabolic process
Os2R_MYB22	4530.OS02T0187700-00	GO Process	GO:0031326	Regulation of cellular biosynthetic process
Os2R_MYB22	4530.OS02T0187700-00	GO Process	GO:0050789	Regulation of biological process
Os2R_MYB22	4530.OS02T0187700-00	GO Process	GO:0050794	Regulation of cellular process
Os2R_MYB22	4530.OS02T0187700-00	GO Process	GO:0051171	Regulation of nitrogen compound metabolic process
Os2R_MYB22	4530.OS02T0187700-00	GO Process	GO:0051252	Regulation of rna metabolic process
Os2R_MYB22	4530.OS02T0187700-00	GO Process	GO:0060255	Regulation of macromolecule metabolic process
Os2R_MYB22	4530.OS02T0187700-00	GO Process	GO:0065007	Biological regulation
Os2R_MYB22	4530.OS02T0187700-00	GO Process	GO:0065009	Regulation of molecular function
Os2R_MYB22	4530.OS02T0187700-00	GO Process	GO:0080090	Regulation of primary metabolic process
Os2R_MYB22	4530.OS02T0187700-00	GO Process	GO:1903506	Regulation of nucleic acid-templated transcription
Os2R_MYB22	4530.OS02T0187700-00	GO Process	GO:2000112	Regulation of cellular macromolecule biosynthetic process
Os2R_MYB22	4530.OS02T0187700-00	GO Process	GO:2001141	Regulation of rna biosynthetic process
Os2R_MYB22	4530.OS02T0187700-00	GO Function	GO:0000976	Transcription regulatory region sequence-specific dna binding
Os2R_MYB22	4530.OS02T0187700-00	GO Function	GO:0001067	Regulatory region nucleic acid binding
Os2R_MYB22	4530.OS02T0187700-00	GO Function	GO:0003676	Nucleic acid binding
Os2R_MYB22	4530.OS02T0187700-00	GO Function	GO:0003677	DNA binding
Os2R_MYB22	4530.OS02T0187700-00	GO Function	GO:0003690	Double-stranded dna binding
Os2R_MYB22	4530.OS02T0187700-00	GO Function	GO:0003700	DNA-binding transcription factor activity
Os2R_MYB22	4530.OS02T0187700-00	GO Function	GO:0005488	Binding
Os2R_MYB22	4530.OS02T0187700-00	GO Function	GO:0043565	Sequence-specific dna binding
Os2R_MYB22	4530.OS02T0187700-00	GO Function	GO:0097159	Organic cyclic compound binding
Os2R_MYB22	4530.OS02T0187700-00	GO Function	GO:0098772	Molecular function regulator
Os2R_MYB22	4530.OS02T0187700-00	GO Function	GO:0140110	Transcription regulator activity
Os2R_MYB22	4530.OS02T0187700-00	GO Function	GO:1901363	Heterocyclic compound binding
Os2R_MYB22	4530.OS02T0187700-00	GO Function	GO:1990837	Sequence-specific double-stranded dna binding
Os2R_MYB22	4530.OS02T0187700-00	GO Component	GO:0005622	Intracellular
Os2R_MYB22	4530.OS02T0187700-00	GO Component	GO:0005634	Nucleus
Os2R_MYB22	4530.OS02T0187700-00	GO Component	GO:0043226	Organelle
Os2R_MYB22	4530.OS02T0187700-00	GO Component	GO:0043227	Membrane-bounded organelle
Os2R_MYB22	4530.OS02T0187700-00	GO Component	GO:0043229	Intracellular organelle
Os2R_MYB22	4530.OS02T0187700-00	GO Component	GO:0043231	Intracellular membrane-bounded organelle
Os2R_MYB22	4530.OS02T0187700-00	GO Component	GO:0110165	Cellular anatomical entity
Os2R_MYB22	4530.OS02T0187700-00	STRING clusters	CL:41441	Mostly uncharacterized, incl. carbohydrate transmembrane transporter activity, and c2 domain
Os2R_MYB22	4530.OS02T0187700-00	STRING clusters	CL:41442	Mostly uncharacterized, incl. c2 domain, and myb-like dna-binding domain
Os2R_MYB22	4530.OS02T0187700-00	STRING clusters	CL:41582	Mostly uncharacterized, incl. protein storage vacuole membrane, and anthocyanin biosynthesis
Os2R_MYB22	4530.OS02T0187700-00	STRING clusters	CL:41586	Mostly uncharacterized, incl. anthocyanin biosynthesis, and response to uv-a
Os2R_MYB22	4530.OS02T0187700-00	STRING clusters	CL:41587	Mixed, incl. anthocyanin biosynthesis, and response to uv-a
Os2R_MYB22	4530.OS02T0187700-00	STRING clusters	CL:41589	Mixed, incl. anthocyanin biosynthesis, and response to uv-a
Os2R_MYB22	4530.OS02T0187700-00	STRING clusters	CL:41591	Mixed, incl. anthocyanin biosynthesis, and low-affinity nitrate transmembrane transporter activity
Os2R_MYB22	4530.OS02T0187700-00	STRING clusters	CL:41595	Mixed, incl. anthocyanin biosynthesis, and low-affinity nitrate transmembrane transporter activity
Os2R_MYB22	4530.OS02T0187700-00	COMPARTMENTS	GOCC:0005622	Intracellular
Os2R_MYB22	4530.OS02T0187700-00	COMPARTMENTS	GOCC:0005634	Nucleus
Os2R_MYB22	4530.OS02T0187700-00	COMPARTMENTS	GOCC:0043226	Organelle
Os2R_MYB22	4530.OS02T0187700-00	COMPARTMENTS	GOCC:0043227	Membrane-bounded organelle
Os2R_MYB22	4530.OS02T0187700-00	COMPARTMENTS	GOCC:0043229	Intracellular organelle
Os2R_MYB22	4530.OS02T0187700-00	COMPARTMENTS	GOCC:0043231	Intracellular membrane-bounded organelle
Os2R_MYB22	4530.OS02T0187700-00	COMPARTMENTS	GOCC:0110165	Cellular anatomical entity
Os2R_MYB22	4530.OS02T0187700-00	UniProt Keywords	KW-0238	DNA-binding
Os2R_MYB22	4530.OS02T0187700-00	UniProt Keywords	KW-0539	Nucleus
Os2R_MYB22	4530.OS02T0187700-00	UniProt Keywords	KW-0804	Transcription
Os2R_MYB22	4530.OS02T0187700-00	UniProt Keywords	KW-0805	Transcription regulation
Os2R_MYB22	4530.OS02T0187700-00	Pfam	PF00249	Myb-like DNA-binding domain
Os2R_MYB22	4530.OS02T0187700-00	Pfam	PF13921	Myb-like DNA-binding domain
Os2R_MYB22	4530.OS02T0187700-00	InterPro	IPR001005	SANT/Myb domain
Os2R_MYB22	4530.OS02T0187700-00	InterPro	IPR009057	Homeobox-like domain superfamily
Os2R_MYB22	4530.OS02T0187700-00	InterPro	IPR017930	Myb domain
Os2R_MYB23	4530.OS02T0271900-01	GO Process	GO:0006355	Regulation of transcription, dna-templated
Os2R_MYB23	4530.OS02T0271900-01	GO Process	GO:0009889	Regulation of biosynthetic process
Os2R_MYB23	4530.OS02T0271900-01	GO Process	GO:0009891	Positive regulation of biosynthetic process
Os2R_MYB23	4530.OS02T0271900-01	GO Process	GO:0009893	Positive regulation of metabolic process
Os2R_MYB23	4530.OS02T0271900-01	GO Process	GO:0010468	Regulation of gene expression
Os2R_MYB23	4530.OS02T0271900-01	GO Process	GO:0010556	Regulation of macromolecule biosynthetic process
Os2R_MYB23	4530.OS02T0271900-01	GO Process	GO:0010557	Positive regulation of macromolecule biosynthetic process
Os2R_MYB23	4530.OS02T0271900-01	GO Process	GO:0010564	Regulation of cell cycle process
Os2R_MYB23	4530.OS02T0271900-01	GO Process	GO:0010604	Positive regulation of macromolecule metabolic process
Os2R_MYB23	4530.OS02T0271900-01	GO Process	GO:0010628	Positive regulation of gene expression
Os2R_MYB23	4530.OS02T0271900-01	GO Process	GO:0019219	Regulation of nucleobase-containing compound metabolic process
Os2R_MYB23	4530.OS02T0271900-01	GO Process	GO:0019222	Regulation of metabolic process
Os2R_MYB23	4530.OS02T0271900-01	GO Process	GO:0031323	Regulation of cellular metabolic process
Os2R_MYB23	4530.OS02T0271900-01	GO Process	GO:0031325	Positive regulation of cellular metabolic process
Os2R_MYB23	4530.OS02T0271900-01	GO Process	GO:0031326	Regulation of cellular biosynthetic process
Os2R_MYB23	4530.OS02T0271900-01	GO Process	GO:0031328	Positive regulation of cellular biosynthetic process
Os2R_MYB23	4530.OS02T0271900-01	GO Process	GO:0032465	Regulation of cytokinesis
Os2R_MYB23	4530.OS02T0271900-01	GO Process	GO:0045893	Positive regulation of transcription, dna-templated
Os2R_MYB23	4530.OS02T0271900-01	GO Process	GO:0045935	Positive regulation of nucleobase-containing compound metabolic process
Os2R_MYB23	4530.OS02T0271900-01	GO Process	GO:0048518	Positive regulation of biological process
Os2R_MYB23	4530.OS02T0271900-01	GO Process	GO:0048519	Negative regulation of biological process
Os2R_MYB23	4530.OS02T0271900-01	GO Process	GO:0048522	Positive regulation of cellular process
Os2R_MYB23	4530.OS02T0271900-01	GO Process	GO:0048523	Negative regulation of cellular process
Os2R_MYB23	4530.OS02T0271900-01	GO Process	GO:0048583	Regulation of response to stimulus
Os2R_MYB23	4530.OS02T0271900-01	GO Process	GO:0048585	Negative regulation of response to stimulus
Os2R_MYB23	4530.OS02T0271900-01	GO Process	GO:0050789	Regulation of biological process
Os2R_MYB23	4530.OS02T0271900-01	GO Process	GO:0050794	Regulation of cellular process
Os2R_MYB23	4530.OS02T0271900-01	GO Process	GO:0051171	Regulation of nitrogen compound metabolic process
Os2R_MYB23	4530.OS02T0271900-01	GO Process	GO:0051173	Positive regulation of nitrogen compound metabolic process
Os2R_MYB23	4530.OS02T0271900-01	GO Process	GO:0051252	Regulation of rna metabolic process
Os2R_MYB23	4530.OS02T0271900-01	GO Process	GO:0051254	Positive regulation of rna metabolic process
Os2R_MYB23	4530.OS02T0271900-01	GO Process	GO:0051302	Regulation of cell division
Os2R_MYB23	4530.OS02T0271900-01	GO Process	GO:0051726	Regulation of cell cycle
Os2R_MYB23	4530.OS02T0271900-01	GO Process	GO:0060255	Regulation of macromolecule metabolic process
Os2R_MYB23	4530.OS02T0271900-01	GO Process	GO:0065007	Biological regulation
Os2R_MYB23	4530.OS02T0271900-01	GO Process	GO:0065009	Regulation of molecular function
Os2R_MYB23	4530.OS02T0271900-01	GO Process	GO:0080090	Regulation of primary metabolic process
Os2R_MYB23	4530.OS02T0271900-01	GO Process	GO:1901181	Negative regulation of cellular response to caffeine
Os2R_MYB23	4530.OS02T0271900-01	GO Process	GO:1902680	Positive regulation of rna biosynthetic process
Os2R_MYB23	4530.OS02T0271900-01	GO Process	GO:1903506	Regulation of nucleic acid-templated transcription
Os2R_MYB23	4530.OS02T0271900-01	GO Process	GO:1903508	Positive regulation of nucleic acid-templated transcription
Os2R_MYB23	4530.OS02T0271900-01	GO Process	GO:2000112	Regulation of cellular macromolecule biosynthetic process
Os2R_MYB23	4530.OS02T0271900-01	GO Process	GO:2001141	Regulation of rna biosynthetic process
Os2R_MYB23	4530.OS02T0271900-01	GO Function	GO:0000976	Transcription regulatory region sequence-specific dna binding
Os2R_MYB23	4530.OS02T0271900-01	GO Function	GO:0001067	Regulatory region nucleic acid binding
Os2R_MYB23	4530.OS02T0271900-01	GO Function	GO:0003676	Nucleic acid binding
Os2R_MYB23	4530.OS02T0271900-01	GO Function	GO:0003677	DNA binding
Os2R_MYB23	4530.OS02T0271900-01	GO Function	GO:0003690	Double-stranded dna binding
Os2R_MYB23	4530.OS02T0271900-01	GO Function	GO:0003700	DNA-binding transcription factor activity
Os2R_MYB23	4530.OS02T0271900-01	GO Function	GO:0003712	Transcription coregulator activity
Os2R_MYB23	4530.OS02T0271900-01	GO Function	GO:0005488	Binding
Os2R_MYB23	4530.OS02T0271900-01	GO Function	GO:0043565	Sequence-specific dna binding
Os2R_MYB23	4530.OS02T0271900-01	GO Function	GO:0097159	Organic cyclic compound binding
Os2R_MYB23	4530.OS02T0271900-01	GO Function	GO:0098772	Molecular function regulator
Os2R_MYB23	4530.OS02T0271900-01	GO Function	GO:0140110	Transcription regulator activity
Os2R_MYB23	4530.OS02T0271900-01	GO Function	GO:1901363	Heterocyclic compound binding
Os2R_MYB23	4530.OS02T0271900-01	GO Function	GO:1990837	Sequence-specific double-stranded dna binding
Os2R_MYB23	4530.OS02T0271900-01	GO Component	GO:0005622	Intracellular
Os2R_MYB23	4530.OS02T0271900-01	GO Component	GO:0005634	Nucleus
Os2R_MYB23	4530.OS02T0271900-01	GO Component	GO:0043226	Organelle
Os2R_MYB23	4530.OS02T0271900-01	GO Component	GO:0043227	Membrane-bounded organelle
Os2R_MYB23	4530.OS02T0271900-01	GO Component	GO:0043229	Intracellular organelle
Os2R_MYB23	4530.OS02T0271900-01	GO Component	GO:0043231	Intracellular membrane-bounded organelle
Os2R_MYB23	4530.OS02T0271900-01	GO Component	GO:0110165	Cellular anatomical entity
Os2R_MYB23	4530.OS02T0271900-01	STRING clusters	CL:7578	Mostly uncharacterized, incl. gata zinc finger, and egf domain
Os2R_MYB23	4530.OS02T0271900-01	STRING clusters	CL:7629	Mixed, incl. negative regulation of cellular response to caffeine, and seed maturation protein
Os2R_MYB23	4530.OS02T0271900-01	COMPARTMENTS	GOCC:0005622	Intracellular
Os2R_MYB23	4530.OS02T0271900-01	COMPARTMENTS	GOCC:0005634	Nucleus
Os2R_MYB23	4530.OS02T0271900-01	COMPARTMENTS	GOCC:0043226	Organelle
Os2R_MYB23	4530.OS02T0271900-01	COMPARTMENTS	GOCC:0043227	Membrane-bounded organelle
Os2R_MYB23	4530.OS02T0271900-01	COMPARTMENTS	GOCC:0043229	Intracellular organelle
Os2R_MYB23	4530.OS02T0271900-01	COMPARTMENTS	GOCC:0043231	Intracellular membrane-bounded organelle
Os2R_MYB23	4530.OS02T0271900-01	COMPARTMENTS	GOCC:0110165	Cellular anatomical entity
Os2R_MYB23	4530.OS02T0271900-01	UniProt Keywords	KW-0238	DNA-binding
Os2R_MYB23	4530.OS02T0271900-01	UniProt Keywords	KW-0539	Nucleus
Os2R_MYB23	4530.OS02T0271900-01	UniProt Keywords	KW-0804	Transcription
Os2R_MYB23	4530.OS02T0271900-01	UniProt Keywords	KW-0805	Transcription regulation
Os2R_MYB23	4530.OS02T0271900-01	Pfam	PF00249	Myb-like DNA-binding domain
Os2R_MYB23	4530.OS02T0271900-01	Pfam	PF13921	Myb-like DNA-binding domain
Os2R_MYB23	4530.OS02T0271900-01	InterPro	IPR001005	SANT/Myb domain
Os2R_MYB23	4530.OS02T0271900-01	InterPro	IPR009057	Homeobox-like domain superfamily
Os2R_MYB23	4530.OS02T0271900-01	InterPro	IPR017930	Myb domain
Os2R_MYB23	4530.OS02T0271900-01	SMART	SM00717	SANT SWI3, ADA2, N-CoR and TFIIIB DNA-binding domains
Os2R_MYB24	4530.OS02T0579300-00	GO Process	GO:0006355	Regulation of transcription, dna-templated
Os2R_MYB24	4530.OS02T0579300-00	GO Process	GO:0009889	Regulation of biosynthetic process
Os2R_MYB24	4530.OS02T0579300-00	GO Process	GO:0009987	Cellular process
Os2R_MYB24	4530.OS02T0579300-00	GO Process	GO:0010468	Regulation of gene expression
Os2R_MYB24	4530.OS02T0579300-00	GO Process	GO:0010556	Regulation of macromolecule biosynthetic process
Os2R_MYB24	4530.OS02T0579300-00	GO Process	GO:0019219	Regulation of nucleobase-containing compound metabolic process
Os2R_MYB24	4530.OS02T0579300-00	GO Process	GO:0019222	Regulation of metabolic process
Os2R_MYB24	4530.OS02T0579300-00	GO Process	GO:0030154	Cell differentiation
Os2R_MYB24	4530.OS02T0579300-00	GO Process	GO:0031323	Regulation of cellular metabolic process
Os2R_MYB24	4530.OS02T0579300-00	GO Process	GO:0031326	Regulation of cellular biosynthetic process
Os2R_MYB24	4530.OS02T0579300-00	GO Process	GO:0032502	Developmental process
Os2R_MYB24	4530.OS02T0579300-00	GO Process	GO:0048869	Cellular developmental process
Os2R_MYB24	4530.OS02T0579300-00	GO Process	GO:0050789	Regulation of biological process
Os2R_MYB24	4530.OS02T0579300-00	GO Process	GO:0050794	Regulation of cellular process
Os2R_MYB24	4530.OS02T0579300-00	GO Process	GO:0051171	Regulation of nitrogen compound metabolic process
Os2R_MYB24	4530.OS02T0579300-00	GO Process	GO:0051252	Regulation of rna metabolic process
Os2R_MYB24	4530.OS02T0579300-00	GO Process	GO:0060255	Regulation of macromolecule metabolic process
Os2R_MYB24	4530.OS02T0579300-00	GO Process	GO:0065007	Biological regulation
Os2R_MYB24	4530.OS02T0579300-00	GO Process	GO:0065009	Regulation of molecular function
Os2R_MYB24	4530.OS02T0579300-00	GO Process	GO:0080090	Regulation of primary metabolic process
Os2R_MYB24	4530.OS02T0579300-00	GO Process	GO:1903506	Regulation of nucleic acid-templated transcription
Os2R_MYB24	4530.OS02T0579300-00	GO Process	GO:2000112	Regulation of cellular macromolecule biosynthetic process
Os2R_MYB24	4530.OS02T0579300-00	GO Process	GO:2001141	Regulation of rna biosynthetic process
Os2R_MYB24	4530.OS02T0579300-00	GO Function	GO:0000976	Transcription regulatory region sequence-specific dna binding
Os2R_MYB24	4530.OS02T0579300-00	GO Function	GO:0001067	Regulatory region nucleic acid binding
Os2R_MYB24	4530.OS02T0579300-00	GO Function	GO:0003676	Nucleic acid binding
Os2R_MYB24	4530.OS02T0579300-00	GO Function	GO:0003677	DNA binding
Os2R_MYB24	4530.OS02T0579300-00	GO Function	GO:0003690	Double-stranded dna binding
Os2R_MYB24	4530.OS02T0579300-00	GO Function	GO:0003700	DNA-binding transcription factor activity
Os2R_MYB24	4530.OS02T0579300-00	GO Function	GO:0005488	Binding
Os2R_MYB24	4530.OS02T0579300-00	GO Function	GO:0043565	Sequence-specific dna binding
Os2R_MYB24	4530.OS02T0579300-00	GO Function	GO:0097159	Organic cyclic compound binding
Os2R_MYB24	4530.OS02T0579300-00	GO Function	GO:0098772	Molecular function regulator
Os2R_MYB24	4530.OS02T0579300-00	GO Function	GO:0140110	Transcription regulator activity
Os2R_MYB24	4530.OS02T0579300-00	GO Function	GO:1901363	Heterocyclic compound binding
Os2R_MYB24	4530.OS02T0579300-00	GO Function	GO:1990837	Sequence-specific double-stranded dna binding
Os2R_MYB24	4530.OS02T0579300-00	GO Component	GO:0005622	Intracellular
Os2R_MYB24	4530.OS02T0579300-00	GO Component	GO:0005634	Nucleus
Os2R_MYB24	4530.OS02T0579300-00	GO Component	GO:0043226	Organelle
Os2R_MYB24	4530.OS02T0579300-00	GO Component	GO:0043227	Membrane-bounded organelle
Os2R_MYB24	4530.OS02T0579300-00	GO Component	GO:0043229	Intracellular organelle
Os2R_MYB24	4530.OS02T0579300-00	GO Component	GO:0043231	Intracellular membrane-bounded organelle
Os2R_MYB24	4530.OS02T0579300-00	GO Component	GO:0110165	Cellular anatomical entity
Os2R_MYB24	4530.OS02T0579300-00	STRING clusters	CL:41441	Mostly uncharacterized, incl. carbohydrate transmembrane transporter activity, and c2 domain
Os2R_MYB24	4530.OS02T0579300-00	STRING clusters	CL:41442	Mostly uncharacterized, incl. c2 domain, and myb-like dna-binding domain
Os2R_MYB24	4530.OS02T0579300-00	STRING clusters	CL:41582	Mostly uncharacterized, incl. protein storage vacuole membrane, and anthocyanin biosynthesis
Os2R_MYB24	4530.OS02T0579300-00	STRING clusters	CL:41586	Mostly uncharacterized, incl. anthocyanin biosynthesis, and response to uv-a
Os2R_MYB24	4530.OS02T0579300-00	STRING clusters	CL:41638	Mixed, incl. basic helix-loop-helix leucine zipper transcription factor, and positive regulation of auxin mediated signaling pathway
Os2R_MYB24	4530.OS02T0579300-00	STRING clusters	CL:41640	Mixed, incl. basic helix-loop-helix leucine zipper transcription factor, and positive regulation of auxin mediated signaling pathway
Os2R_MYB24	4530.OS02T0579300-00	STRING clusters	CL:41642	Basic helix-loop-helix leucine zipper transcription factor, and DNA-binding transcription activator activity, RNA polymerase II-specific
Os2R_MYB24	4530.OS02T0579300-00	COMPARTMENTS	GOCC:0005622	Intracellular
Os2R_MYB24	4530.OS02T0579300-00	COMPARTMENTS	GOCC:0005634	Nucleus
Os2R_MYB24	4530.OS02T0579300-00	COMPARTMENTS	GOCC:0043226	Organelle
Os2R_MYB24	4530.OS02T0579300-00	COMPARTMENTS	GOCC:0043227	Membrane-bounded organelle
Os2R_MYB24	4530.OS02T0579300-00	COMPARTMENTS	GOCC:0043229	Intracellular organelle
Os2R_MYB24	4530.OS02T0579300-00	COMPARTMENTS	GOCC:0043231	Intracellular membrane-bounded organelle
Os2R_MYB24	4530.OS02T0579300-00	COMPARTMENTS	GOCC:0110165	Cellular anatomical entity
Os2R_MYB24	4530.OS02T0579300-00	UniProt Keywords	KW-0238	DNA-binding
Os2R_MYB24	4530.OS02T0579300-00	UniProt Keywords	KW-0539	Nucleus
Os2R_MYB24	4530.OS02T0579300-00	UniProt Keywords	KW-0804	Transcription
Os2R_MYB24	4530.OS02T0579300-00	UniProt Keywords	KW-0805	Transcription regulation
Os2R_MYB24	4530.OS02T0579300-00	Pfam	PF00249	Myb-like DNA-binding domain
Os2R_MYB24	4530.OS02T0579300-00	InterPro	IPR001005	SANT/Myb domain
Os2R_MYB24	4530.OS02T0579300-00	InterPro	IPR009057	Homeobox-like domain superfamily
Os2R_MYB24	4530.OS02T0579300-00	InterPro	IPR017930	Myb domain
Os2R_MYB24	4530.OS02T0579300-00	SMART	SM00717	SANT SWI3, ADA2, N-CoR and TFIIIB DNA-binding domains
Os2R_MYB25	4530.OS02T0618400-02	GO Process	GO:0006355	Regulation of transcription, dna-templated
Os2R_MYB25	4530.OS02T0618400-02	GO Process	GO:0009889	Regulation of biosynthetic process
Os2R_MYB25	4530.OS02T0618400-02	GO Process	GO:0009987	Cellular process
Os2R_MYB25	4530.OS02T0618400-02	GO Process	GO:0010468	Regulation of gene expression
Os2R_MYB25	4530.OS02T0618400-02	GO Process	GO:0010556	Regulation of macromolecule biosynthetic process
Os2R_MYB25	4530.OS02T0618400-02	GO Process	GO:0019219	Regulation of nucleobase-containing compound metabolic process
Os2R_MYB25	4530.OS02T0618400-02	GO Process	GO:0019222	Regulation of metabolic process
Os2R_MYB25	4530.OS02T0618400-02	GO Process	GO:0031323	Regulation of cellular metabolic process
Os2R_MYB25	4530.OS02T0618400-02	GO Process	GO:0031326	Regulation of cellular biosynthetic process
Os2R_MYB25	4530.OS02T0618400-02	GO Process	GO:0050789	Regulation of biological process
Os2R_MYB25	4530.OS02T0618400-02	GO Process	GO:0050794	Regulation of cellular process
Os2R_MYB25	4530.OS02T0618400-02	GO Process	GO:0051171	Regulation of nitrogen compound metabolic process
Os2R_MYB25	4530.OS02T0618400-02	GO Process	GO:0051252	Regulation of rna metabolic process
Os2R_MYB25	4530.OS02T0618400-02	GO Process	GO:0060255	Regulation of macromolecule metabolic process
Os2R_MYB25	4530.OS02T0618400-02	GO Process	GO:0065007	Biological regulation
Os2R_MYB25	4530.OS02T0618400-02	GO Process	GO:0065009	Regulation of molecular function
Os2R_MYB25	4530.OS02T0618400-02	GO Process	GO:0080090	Regulation of primary metabolic process
Os2R_MYB25	4530.OS02T0618400-02	GO Process	GO:1903506	Regulation of nucleic acid-templated transcription
Os2R_MYB25	4530.OS02T0618400-02	GO Process	GO:2000112	Regulation of cellular macromolecule biosynthetic process
Os2R_MYB25	4530.OS02T0618400-02	GO Process	GO:2001141	Regulation of rna biosynthetic process
Os2R_MYB25	4530.OS02T0618400-02	GO Function	GO:0003676	Nucleic acid binding
Os2R_MYB25	4530.OS02T0618400-02	GO Function	GO:0003677	DNA binding
Os2R_MYB25	4530.OS02T0618400-02	GO Function	GO:0005488	Binding
Os2R_MYB25	4530.OS02T0618400-02	GO Function	GO:0097159	Organic cyclic compound binding
Os2R_MYB25	4530.OS02T0618400-02	GO Function	GO:1901363	Heterocyclic compound binding
Os2R_MYB25	4530.OS02T0618400-02	GO Component	GO:0005622	Intracellular
Os2R_MYB25	4530.OS02T0618400-02	GO Component	GO:0005634	Nucleus
Os2R_MYB25	4530.OS02T0618400-02	GO Component	GO:0043226	Organelle
Os2R_MYB25	4530.OS02T0618400-02	GO Component	GO:0043227	Membrane-bounded organelle
Os2R_MYB25	4530.OS02T0618400-02	GO Component	GO:0043229	Intracellular organelle
Os2R_MYB25	4530.OS02T0618400-02	GO Component	GO:0043231	Intracellular membrane-bounded organelle
Os2R_MYB25	4530.OS02T0618400-02	GO Component	GO:0110165	Cellular anatomical entity
Os2R_MYB25	4530.OS02T0618400-02	STRING clusters	CL:37450	Mixed, incl. glycoprotein biosynthetic process, and glycosyltransferase 61
Os2R_MYB25	4530.OS02T0618400-02	STRING clusters	CL:37656	Mixed, incl. prolyl 4-hydroxylase, alpha subunit, and cellulose degradation
Os2R_MYB25	4530.OS02T0618400-02	STRING clusters	CL:37706	Frizzled binding, and transcriptional repressor, ovate
Os2R_MYB25	4530.OS02T0618400-02	COMPARTMENTS	GOCC:0005622	Intracellular
Os2R_MYB25	4530.OS02T0618400-02	COMPARTMENTS	GOCC:0005634	Nucleus
Os2R_MYB25	4530.OS02T0618400-02	COMPARTMENTS	GOCC:0043226	Organelle
Os2R_MYB25	4530.OS02T0618400-02	COMPARTMENTS	GOCC:0043227	Membrane-bounded organelle
Os2R_MYB25	4530.OS02T0618400-02	COMPARTMENTS	GOCC:0043229	Intracellular organelle
Os2R_MYB25	4530.OS02T0618400-02	COMPARTMENTS	GOCC:0043231	Intracellular membrane-bounded organelle
Os2R_MYB25	4530.OS02T0618400-02	COMPARTMENTS	GOCC:0110165	Cellular anatomical entity
Os2R_MYB25	4530.OS02T0618400-02	Pfam	PF00249	Myb-like DNA-binding domain
Os2R_MYB25	4530.OS02T0618400-02	Pfam	PF13921	Myb-like DNA-binding domain
Os2R_MYB25	4530.OS02T0618400-02	InterPro	IPR001005	SANT/Myb domain
Os2R_MYB25	4530.OS02T0618400-02	InterPro	IPR009057	Homeobox-like domain superfamily
Os2R_MYB25	4530.OS02T0618400-02	InterPro	IPR017930	Myb domain
Os2R_MYB25	4530.OS02T0618400-02	SMART	SM00717	SANT SWI3, ADA2, N-CoR and TFIIIB DNA-binding domains
Os2R_MYB29	4530.OS02T0695200-01	GO Process	GO:0006355	Regulation of transcription, dna-templated
Os2R_MYB29	4530.OS02T0695200-01	GO Process	GO:0009889	Regulation of biosynthetic process
Os2R_MYB29	4530.OS02T0695200-01	GO Process	GO:0009987	Cellular process
Os2R_MYB29	4530.OS02T0695200-01	GO Process	GO:0010468	Regulation of gene expression
Os2R_MYB29	4530.OS02T0695200-01	GO Process	GO:0010556	Regulation of macromolecule biosynthetic process
Os2R_MYB29	4530.OS02T0695200-01	GO Process	GO:0019219	Regulation of nucleobase-containing compound metabolic process
Os2R_MYB29	4530.OS02T0695200-01	GO Process	GO:0019222	Regulation of metabolic process
Os2R_MYB29	4530.OS02T0695200-01	GO Process	GO:0030154	Cell differentiation
Os2R_MYB29	4530.OS02T0695200-01	GO Process	GO:0031323	Regulation of cellular metabolic process
Os2R_MYB29	4530.OS02T0695200-01	GO Process	GO:0031326	Regulation of cellular biosynthetic process
Os2R_MYB29	4530.OS02T0695200-01	GO Process	GO:0032502	Developmental process
Os2R_MYB29	4530.OS02T0695200-01	GO Process	GO:0048869	Cellular developmental process
Os2R_MYB29	4530.OS02T0695200-01	GO Process	GO:0050789	Regulation of biological process
Os2R_MYB29	4530.OS02T0695200-01	GO Process	GO:0050794	Regulation of cellular process
Os2R_MYB29	4530.OS02T0695200-01	GO Process	GO:0051171	Regulation of nitrogen compound metabolic process
Os2R_MYB29	4530.OS02T0695200-01	GO Process	GO:0051252	Regulation of rna metabolic process
Os2R_MYB29	4530.OS02T0695200-01	GO Process	GO:0060255	Regulation of macromolecule metabolic process
Os2R_MYB29	4530.OS02T0695200-01	GO Process	GO:0065007	Biological regulation
Os2R_MYB29	4530.OS02T0695200-01	GO Process	GO:0065009	Regulation of molecular function
Os2R_MYB29	4530.OS02T0695200-01	GO Process	GO:0080090	Regulation of primary metabolic process
Os2R_MYB29	4530.OS02T0695200-01	GO Process	GO:1903506	Regulation of nucleic acid-templated transcription
Os2R_MYB29	4530.OS02T0695200-01	GO Process	GO:2000112	Regulation of cellular macromolecule biosynthetic process
Os2R_MYB29	4530.OS02T0695200-01	GO Process	GO:2001141	Regulation of rna biosynthetic process
Os2R_MYB29	4530.OS02T0695200-01	GO Function	GO:0000976	Transcription regulatory region sequence-specific dna binding
Os2R_MYB29	4530.OS02T0695200-01	GO Function	GO:0001067	Regulatory region nucleic acid binding
Os2R_MYB29	4530.OS02T0695200-01	GO Function	GO:0003676	Nucleic acid binding
Os2R_MYB29	4530.OS02T0695200-01	GO Function	GO:0003677	DNA binding
Os2R_MYB29	4530.OS02T0695200-01	GO Function	GO:0003690	Double-stranded dna binding
Os2R_MYB29	4530.OS02T0695200-01	GO Function	GO:0003700	DNA-binding transcription factor activity
Os2R_MYB29	4530.OS02T0695200-01	GO Function	GO:0005488	Binding
Os2R_MYB29	4530.OS02T0695200-01	GO Function	GO:0043565	Sequence-specific dna binding
Os2R_MYB29	4530.OS02T0695200-01	GO Function	GO:0097159	Organic cyclic compound binding
Os2R_MYB29	4530.OS02T0695200-01	GO Function	GO:0098772	Molecular function regulator
Os2R_MYB29	4530.OS02T0695200-01	GO Function	GO:0140110	Transcription regulator activity
Os2R_MYB29	4530.OS02T0695200-01	GO Function	GO:1901363	Heterocyclic compound binding
Os2R_MYB29	4530.OS02T0695200-01	GO Function	GO:1990837	Sequence-specific double-stranded dna binding
Os2R_MYB29	4530.OS02T0695200-01	GO Component	GO:0005622	Intracellular
Os2R_MYB29	4530.OS02T0695200-01	GO Component	GO:0005634	Nucleus
Os2R_MYB29	4530.OS02T0695200-01	GO Component	GO:0043226	Organelle
Os2R_MYB29	4530.OS02T0695200-01	GO Component	GO:0043227	Membrane-bounded organelle
Os2R_MYB29	4530.OS02T0695200-01	GO Component	GO:0043229	Intracellular organelle
Os2R_MYB29	4530.OS02T0695200-01	GO Component	GO:0043231	Intracellular membrane-bounded organelle
Os2R_MYB29	4530.OS02T0695200-01	GO Component	GO:0110165	Cellular anatomical entity
Os2R_MYB29	4530.OS02T0695200-01	STRING clusters	CL:11688	Mixed, incl. cyclophilin-like domain superfamily, and protein peptidyl-prolyl isomerization
Os2R_MYB29	4530.OS02T0695200-01	COMPARTMENTS	GOCC:0005622	Intracellular
Os2R_MYB29	4530.OS02T0695200-01	COMPARTMENTS	GOCC:0005634	Nucleus
Os2R_MYB29	4530.OS02T0695200-01	COMPARTMENTS	GOCC:0043226	Organelle
Os2R_MYB29	4530.OS02T0695200-01	COMPARTMENTS	GOCC:0043227	Membrane-bounded organelle
Os2R_MYB29	4530.OS02T0695200-01	COMPARTMENTS	GOCC:0043229	Intracellular organelle
Os2R_MYB29	4530.OS02T0695200-01	COMPARTMENTS	GOCC:0043231	Intracellular membrane-bounded organelle
Os2R_MYB29	4530.OS02T0695200-01	COMPARTMENTS	GOCC:0110165	Cellular anatomical entity
Os2R_MYB29	4530.OS02T0695200-01	UniProt Keywords	KW-0238	DNA-binding
Os2R_MYB29	4530.OS02T0695200-01	UniProt Keywords	KW-0539	Nucleus
Os2R_MYB29	4530.OS02T0695200-01	UniProt Keywords	KW-0804	Transcription
Os2R_MYB29	4530.OS02T0695200-01	UniProt Keywords	KW-0805	Transcription regulation
Os2R_MYB29	4530.OS02T0695200-01	Pfam	PF00249	Myb-like DNA-binding domain
Os2R_MYB29	4530.OS02T0695200-01	Pfam	PF13921	Myb-like DNA-binding domain
Os2R_MYB29	4530.OS02T0695200-01	InterPro	IPR001005	SANT/Myb domain
Os2R_MYB29	4530.OS02T0695200-01	InterPro	IPR009057	Homeobox-like domain superfamily
Os2R_MYB29	4530.OS02T0695200-01	InterPro	IPR017930	Myb domain
Os2R_MYB29	4530.OS02T0695200-01	SMART	SM00717	SANT SWI3, ADA2, N-CoR and TFIIIB DNA-binding domains
Os2R_MYB30	4530.OS02T0732600-01	GO Process	GO:0006355	Regulation of transcription, dna-templated
Os2R_MYB30	4530.OS02T0732600-01	GO Process	GO:0009889	Regulation of biosynthetic process
Os2R_MYB30	4530.OS02T0732600-01	GO Process	GO:0009890	Negative regulation of biosynthetic process
Os2R_MYB30	4530.OS02T0732600-01	GO Process	GO:0009892	Negative regulation of metabolic process
Os2R_MYB30	4530.OS02T0732600-01	GO Process	GO:0009987	Cellular process
Os2R_MYB30	4530.OS02T0732600-01	GO Process	GO:0010468	Regulation of gene expression
Os2R_MYB30	4530.OS02T0732600-01	GO Process	GO:0010556	Regulation of macromolecule biosynthetic process
Os2R_MYB30	4530.OS02T0732600-01	GO Process	GO:0010558	Negative regulation of macromolecule biosynthetic process
Os2R_MYB30	4530.OS02T0732600-01	GO Process	GO:0010605	Negative regulation of macromolecule metabolic process
Os2R_MYB30	4530.OS02T0732600-01	GO Process	GO:0010629	Negative regulation of gene expression
Os2R_MYB30	4530.OS02T0732600-01	GO Process	GO:0019219	Regulation of nucleobase-containing compound metabolic process
Os2R_MYB30	4530.OS02T0732600-01	GO Process	GO:0019222	Regulation of metabolic process
Os2R_MYB30	4530.OS02T0732600-01	GO Process	GO:0030154	Cell differentiation
Os2R_MYB30	4530.OS02T0732600-01	GO Process	GO:0031323	Regulation of cellular metabolic process
Os2R_MYB30	4530.OS02T0732600-01	GO Process	GO:0031324	Negative regulation of cellular metabolic process
Os2R_MYB30	4530.OS02T0732600-01	GO Process	GO:0031326	Regulation of cellular biosynthetic process
Os2R_MYB30	4530.OS02T0732600-01	GO Process	GO:0031327	Negative regulation of cellular biosynthetic process
Os2R_MYB30	4530.OS02T0732600-01	GO Process	GO:0032502	Developmental process
Os2R_MYB30	4530.OS02T0732600-01	GO Process	GO:0044087	Regulation of cellular component biogenesis
Os2R_MYB30	4530.OS02T0732600-01	GO Process	GO:0045892	Negative regulation of transcription, dna-templated
Os2R_MYB30	4530.OS02T0732600-01	GO Process	GO:0045934	Negative regulation of nucleobase-containing compound metabolic process
Os2R_MYB30	4530.OS02T0732600-01	GO Process	GO:0047484	Regulation of response to osmotic stress
Os2R_MYB30	4530.OS02T0732600-01	GO Process	GO:0048518	Positive regulation of biological process
Os2R_MYB30	4530.OS02T0732600-01	GO Process	GO:0048519	Negative regulation of biological process
Os2R_MYB30	4530.OS02T0732600-01	GO Process	GO:0048523	Negative regulation of cellular process
Os2R_MYB30	4530.OS02T0732600-01	GO Process	GO:0048583	Regulation of response to stimulus
Os2R_MYB30	4530.OS02T0732600-01	GO Process	GO:0048584	Positive regulation of response to stimulus
Os2R_MYB30	4530.OS02T0732600-01	GO Process	GO:0048869	Cellular developmental process
Os2R_MYB30	4530.OS02T0732600-01	GO Process	GO:0050789	Regulation of biological process
Os2R_MYB30	4530.OS02T0732600-01	GO Process	GO:0050794	Regulation of cellular process
Os2R_MYB30	4530.OS02T0732600-01	GO Process	GO:0051171	Regulation of nitrogen compound metabolic process
Os2R_MYB30	4530.OS02T0732600-01	GO Process	GO:0051172	Negative regulation of nitrogen compound metabolic process
Os2R_MYB30	4530.OS02T0732600-01	GO Process	GO:0051252	Regulation of rna metabolic process
Os2R_MYB30	4530.OS02T0732600-01	GO Process	GO:0051253	Negative regulation of rna metabolic process
Os2R_MYB30	4530.OS02T0732600-01	GO Process	GO:0060255	Regulation of macromolecule metabolic process
Os2R_MYB30	4530.OS02T0732600-01	GO Process	GO:0065007	Biological regulation
Os2R_MYB30	4530.OS02T0732600-01	GO Process	GO:0065009	Regulation of molecular function
Os2R_MYB30	4530.OS02T0732600-01	GO Process	GO:0080090	Regulation of primary metabolic process
Os2R_MYB30	4530.OS02T0732600-01	GO Process	GO:0080134	Regulation of response to stress
Os2R_MYB30	4530.OS02T0732600-01	GO Process	GO:1901000	Regulation of response to salt stress
Os2R_MYB30	4530.OS02T0732600-01	GO Process	GO:1901002	Positive regulation of response to salt stress
Os2R_MYB30	4530.OS02T0732600-01	GO Process	GO:1902679	Negative regulation of rna biosynthetic process
Os2R_MYB30	4530.OS02T0732600-01	GO Process	GO:1903338	Regulation of cell wall organization or biogenesis
Os2R_MYB30	4530.OS02T0732600-01	GO Process	GO:1903506	Regulation of nucleic acid-templated transcription
Os2R_MYB30	4530.OS02T0732600-01	GO Process	GO:1903507	Negative regulation of nucleic acid-templated transcription
Os2R_MYB30	4530.OS02T0732600-01	GO Process	GO:2000112	Regulation of cellular macromolecule biosynthetic process
Os2R_MYB30	4530.OS02T0732600-01	GO Process	GO:2000113	Negative regulation of cellular macromolecule biosynthetic process
Os2R_MYB30	4530.OS02T0732600-01	GO Process	GO:2000652	Regulation of secondary cell wall biogenesis
Os2R_MYB30	4530.OS02T0732600-01	GO Process	GO:2001141	Regulation of rna biosynthetic process
Os2R_MYB30	4530.OS02T0732600-01	GO Function	GO:0003676	Nucleic acid binding
Os2R_MYB30	4530.OS02T0732600-01	GO Function	GO:0003677	DNA binding
Os2R_MYB30	4530.OS02T0732600-01	GO Function	GO:0005488	Binding
Os2R_MYB30	4530.OS02T0732600-01	GO Function	GO:0097159	Organic cyclic compound binding
Os2R_MYB30	4530.OS02T0732600-01	GO Function	GO:1901363	Heterocyclic compound binding
Os2R_MYB30	4530.OS02T0732600-01	GO Component	GO:0005622	Intracellular
Os2R_MYB30	4530.OS02T0732600-01	GO Component	GO:0005634	Nucleus
Os2R_MYB30	4530.OS02T0732600-01	GO Component	GO:0043226	Organelle
Os2R_MYB30	4530.OS02T0732600-01	GO Component	GO:0043227	Membrane-bounded organelle
Os2R_MYB30	4530.OS02T0732600-01	GO Component	GO:0043229	Intracellular organelle
Os2R_MYB30	4530.OS02T0732600-01	GO Component	GO:0043231	Intracellular membrane-bounded organelle
Os2R_MYB30	4530.OS02T0732600-01	GO Component	GO:0110165	Cellular anatomical entity
Os2R_MYB30	4530.OS02T0732600-01	STRING clusters	CL:30190	Mixed, incl. carbonate dehydratase activity, and slc26a/sulp transporter
Os2R_MYB30	4530.OS02T0732600-01	STRING clusters	CL:30191	Mixed, incl. carbonate dehydratase activity, and slc26a/sulp transporter
Os2R_MYB30	4530.OS02T0732600-01	STRING clusters	CL:30192	Mixed, incl. wax2 c-terminal domain, and gdsl lipase/esterase-like, plant
Os2R_MYB30	4530.OS02T0732600-01	STRING clusters	CL:30194	Mixed, incl. wax2 c-terminal domain, and sulfation
Os2R_MYB30	4530.OS02T0732600-01	COMPARTMENTS	GOCC:0005622	Intracellular
Os2R_MYB30	4530.OS02T0732600-01	COMPARTMENTS	GOCC:0005634	Nucleus
Os2R_MYB30	4530.OS02T0732600-01	COMPARTMENTS	GOCC:0043226	Organelle
Os2R_MYB30	4530.OS02T0732600-01	COMPARTMENTS	GOCC:0043227	Membrane-bounded organelle
Os2R_MYB30	4530.OS02T0732600-01	COMPARTMENTS	GOCC:0043229	Intracellular organelle
Os2R_MYB30	4530.OS02T0732600-01	COMPARTMENTS	GOCC:0043231	Intracellular membrane-bounded organelle
Os2R_MYB30	4530.OS02T0732600-01	COMPARTMENTS	GOCC:0110165	Cellular anatomical entity
Os2R_MYB30	4530.OS02T0732600-01	UniProt Keywords	KW-0238	DNA-binding
Os2R_MYB30	4530.OS02T0732600-01	UniProt Keywords	KW-0539	Nucleus
Os2R_MYB30	4530.OS02T0732600-01	UniProt Keywords	KW-0804	Transcription
Os2R_MYB30	4530.OS02T0732600-01	UniProt Keywords	KW-0805	Transcription regulation
Os2R_MYB30	4530.OS02T0732600-01	Pfam	PF00249	Myb-like DNA-binding domain
Os2R_MYB30	4530.OS02T0732600-01	Pfam	PF13921	Myb-like DNA-binding domain
Os2R_MYB30	4530.OS02T0732600-01	InterPro	IPR001005	SANT/Myb domain
Os2R_MYB30	4530.OS02T0732600-01	InterPro	IPR009057	Homeobox-like domain superfamily
Os2R_MYB30	4530.OS02T0732600-01	InterPro	IPR017930	Myb domain
Os2R_MYB30	4530.OS02T0732600-01	SMART	SM00717	SANT SWI3, ADA2, N-CoR and TFIIIB DNA-binding domains
Os2R_MYB32	4530.OS02T0786400-00	GO Process	GO:0006355	Regulation of transcription, dna-templated
Os2R_MYB32	4530.OS02T0786400-00	GO Process	GO:0007275	Multicellular organism development
Os2R_MYB32	4530.OS02T0786400-00	GO Process	GO:0009889	Regulation of biosynthetic process
Os2R_MYB32	4530.OS02T0786400-00	GO Process	GO:0009987	Cellular process
Os2R_MYB32	4530.OS02T0786400-00	GO Process	GO:0010468	Regulation of gene expression
Os2R_MYB32	4530.OS02T0786400-00	GO Process	GO:0010556	Regulation of macromolecule biosynthetic process
Os2R_MYB32	4530.OS02T0786400-00	GO Process	GO:0019219	Regulation of nucleobase-containing compound metabolic process
Os2R_MYB32	4530.OS02T0786400-00	GO Process	GO:0019222	Regulation of metabolic process
Os2R_MYB32	4530.OS02T0786400-00	GO Process	GO:0030154	Cell differentiation
Os2R_MYB32	4530.OS02T0786400-00	GO Process	GO:0031323	Regulation of cellular metabolic process
Os2R_MYB32	4530.OS02T0786400-00	GO Process	GO:0031326	Regulation of cellular biosynthetic process
Os2R_MYB32	4530.OS02T0786400-00	GO Process	GO:0032501	Multicellular organismal process
Os2R_MYB32	4530.OS02T0786400-00	GO Process	GO:0032502	Developmental process
Os2R_MYB32	4530.OS02T0786400-00	GO Process	GO:0048856	Anatomical structure development
Os2R_MYB32	4530.OS02T0786400-00	GO Process	GO:0048869	Cellular developmental process
Os2R_MYB32	4530.OS02T0786400-00	GO Process	GO:0050789	Regulation of biological process
Os2R_MYB32	4530.OS02T0786400-00	GO Process	GO:0050794	Regulation of cellular process
Os2R_MYB32	4530.OS02T0786400-00	GO Process	GO:0051171	Regulation of nitrogen compound metabolic process
Os2R_MYB32	4530.OS02T0786400-00	GO Process	GO:0051252	Regulation of rna metabolic process
Os2R_MYB32	4530.OS02T0786400-00	GO Process	GO:0060255	Regulation of macromolecule metabolic process
Os2R_MYB32	4530.OS02T0786400-00	GO Process	GO:0065007	Biological regulation
Os2R_MYB32	4530.OS02T0786400-00	GO Process	GO:0065009	Regulation of molecular function
Os2R_MYB32	4530.OS02T0786400-00	GO Process	GO:0080090	Regulation of primary metabolic process
Os2R_MYB32	4530.OS02T0786400-00	GO Process	GO:1903506	Regulation of nucleic acid-templated transcription
Os2R_MYB32	4530.OS02T0786400-00	GO Process	GO:2000112	Regulation of cellular macromolecule biosynthetic process
Os2R_MYB32	4530.OS02T0786400-00	GO Process	GO:2001141	Regulation of rna biosynthetic process
Os2R_MYB32	4530.OS02T0786400-00	GO Function	GO:0000976	Transcription regulatory region sequence-specific dna binding
Os2R_MYB32	4530.OS02T0786400-00	GO Function	GO:0001067	Regulatory region nucleic acid binding
Os2R_MYB32	4530.OS02T0786400-00	GO Function	GO:0003676	Nucleic acid binding
Os2R_MYB32	4530.OS02T0786400-00	GO Function	GO:0003677	DNA binding
Os2R_MYB32	4530.OS02T0786400-00	GO Function	GO:0003690	Double-stranded dna binding
Os2R_MYB32	4530.OS02T0786400-00	GO Function	GO:0003700	DNA-binding transcription factor activity
Os2R_MYB32	4530.OS02T0786400-00	GO Function	GO:0005488	Binding
Os2R_MYB32	4530.OS02T0786400-00	GO Function	GO:0043565	Sequence-specific dna binding
Os2R_MYB32	4530.OS02T0786400-00	GO Function	GO:0097159	Organic cyclic compound binding
Os2R_MYB32	4530.OS02T0786400-00	GO Function	GO:0098772	Molecular function regulator
Os2R_MYB32	4530.OS02T0786400-00	GO Function	GO:0140110	Transcription regulator activity
Os2R_MYB32	4530.OS02T0786400-00	GO Function	GO:1901363	Heterocyclic compound binding
[truncated: 4,546 more rows]
