# Supplementary figures and images for: Genome-Wide Identification of R2R3-MYB Transcription Factor and Expression Analysis under Abiotic Stress in Rice
Source: MDPI journal article supplement (doi:10.3390/plants11151928), 2022-07-25

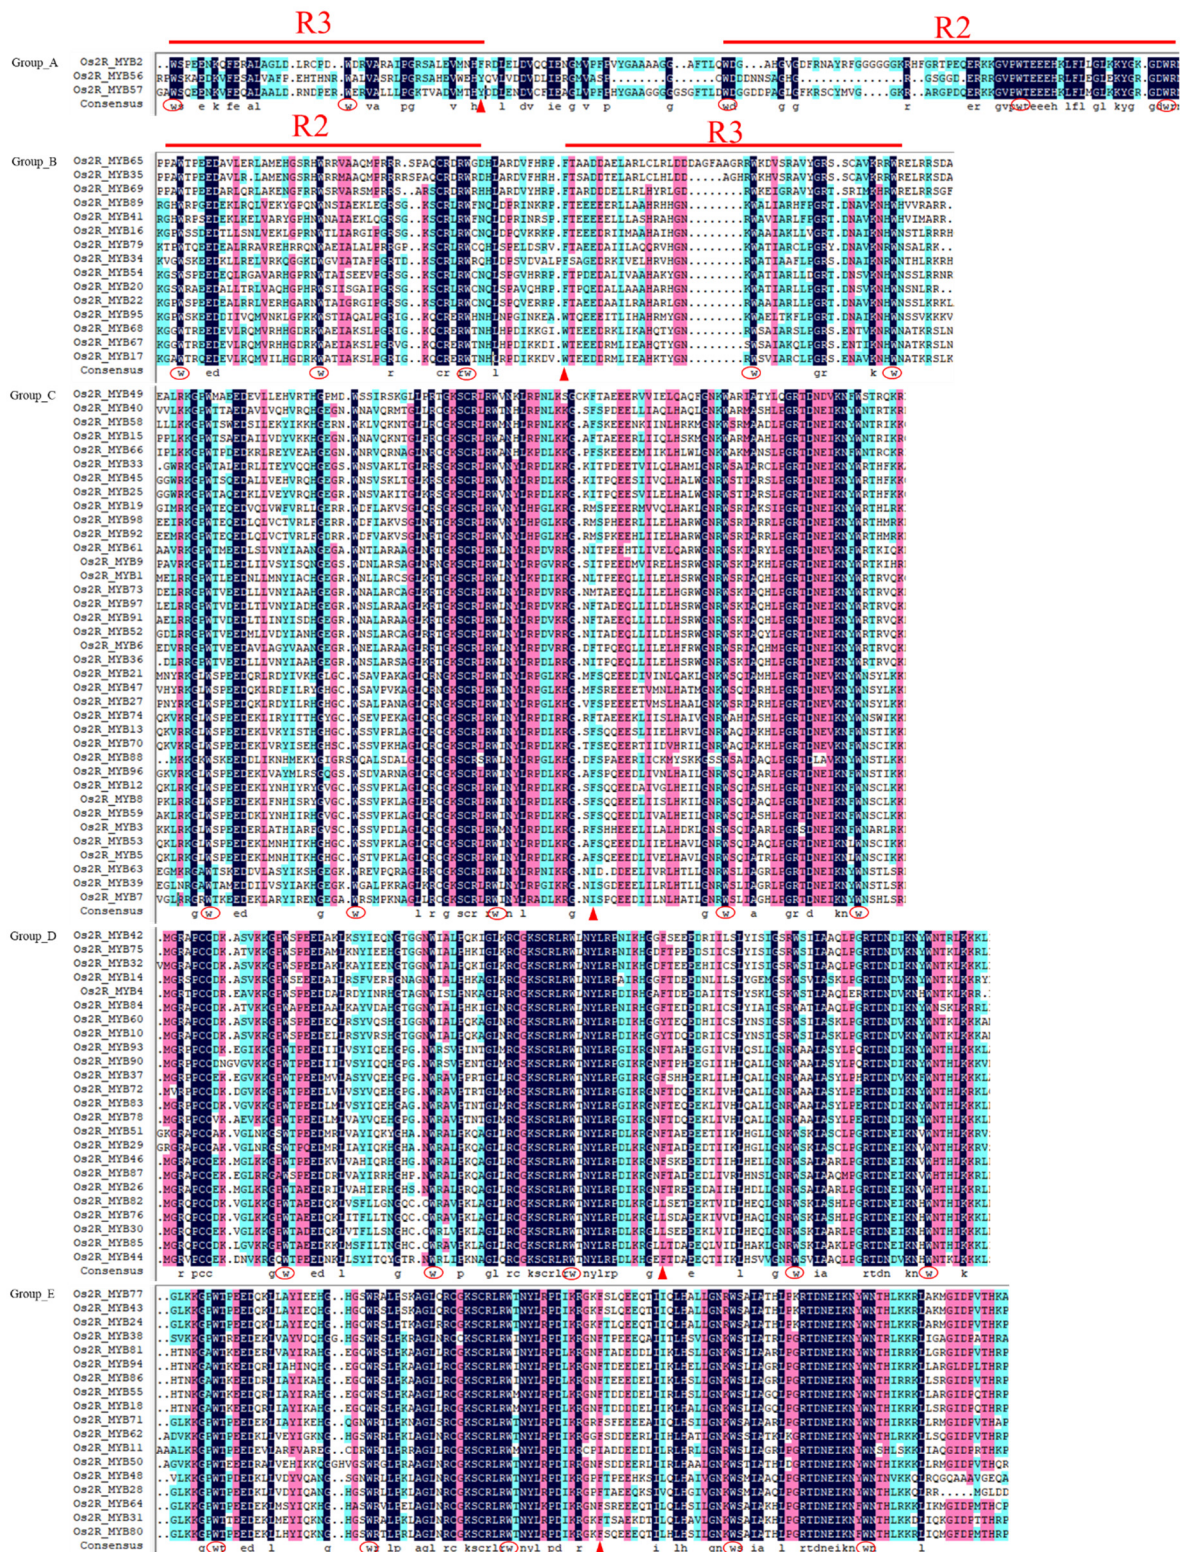

Supplement: s1 [file s1]
